# Supplementary material for: Reversible carbon–boron bond formation at platinum centers through σ-BH complexes
Source: Royal Society of Chemistry journal article supplement (doi:10.1039/d0sc05522k), 2020-11-10
Supplement: d0sc05522k1.pdf [file d0sc05522k1.pdf]

## Supporting Information

### **Reversible Carbon-Boron Bond Formation at Platinum Centers Through $\sigma$ -BH Complexes**

Pablo Ríos, Rocío Martín-de la Calle, Pietro Vidossich, Francisco José Fernández-de-Córdova, Agustí Lledós\* and Salvador Conejero\*

## Table of Contents

|                                                                                    |    |
|------------------------------------------------------------------------------------|----|
| 1. General.....                                                                    | 2  |
| 2. Synthesis and spectroscopic and analytical data for complexes <b>2a-c</b> ..... | 2  |
| 3. Synthesis and spectroscopic data for complexes <b>3a-c</b> .....                | 4  |
| 4. Synthesis and spectroscopic data for complex <b>4a</b> .....                    | 5  |
| 5. Synthesis and spectroscopic and analytical data for complex <b>5</b> .....      | 5  |
| 6. NMR spectra.....                                                                | 6  |
| 7. Computational details.....                                                      | 21 |
| 8. Optimized structure of complex <b>3c</b> .....                                  | 22 |
| 9. Optimized structures of $\sigma$ -BH complexes.....                             | 23 |
| 10. QTAIM analysis of complex <b>3c</b> .....                                      | 24 |
| 11. Relaxed potential energy scan calculations on <b>3c</b> .....                  | 26 |
| 12. High energy transition states.....                                             | 28 |
| 13. Calculated energy profiles.....                                                | 31 |
| 14. Cartesian coordinates of the optimized structures.....                         | 35 |
| 15. Crystallographic details.....                                                  | 80 |
| 16. References.....                                                                | 81 |

### 1. General

All manipulations were carried out using standard Schlenk and glovebox techniques, under an atmosphere of argon and of high purity nitrogen, respectively. All solvents were dried and degassed prior to use. *n*-Pentane was distilled over sodium and stored under Na/K alloy. Dichloromethane- $d_2$  ( $CD_2Cl_2$ ) was heated under reflux over calcium hydride, distilled under Argon and stored under 3 Å activated molecular sieves. NMR spectra were recorded on Bruker DRX-500, DRX-400 and DPX-300 spectrometers, and they were referenced to external  $SiMe_4$  ( $\delta$  0 ppm) using the residual protio solvent peaks as internal standard ( $^1H$  NMR experiments) or the characteristic resonances of the solvent nuclei ( $^{13}C$  NMR experiments).  $^{11}B$  NMR spectra were referenced to an external standard of  $BF_3 \cdot Et_2O$ . Spectral assignments were made by routine one- and two-dimensional NMR experiments where appropriate. Elemental analysis was carried out with a LECO TruSpec CHN elementary analyser. HBpin and HBcat were purchased from Aldrich or TCI, stored under argon and used as received. Borane HBdab was prepared from  $SMe_2 \cdot BH_3$  and 1,2-phenylenediamine as previously described.<sup>[1]</sup> Complex  $[Pt(I^tBu^iPr)(I^iBu^iPr)][BAr^F]$ , **1**, was obtained accordingly to published procedures.<sup>[2]</sup>

### 2. Synthesis and spectroscopic and analytical data for complexes **2a-c**.

**General procedure:** Complex **1** (80 mg, 0.057 mmol) was dissolved in 2 mL of dry CH<sub>2</sub>Cl<sub>2</sub> and mixed via cannula with a solution of the corresponding borane (0.063 mmol) in 0.5 mL of CH<sub>2</sub>Cl<sub>2</sub>. The mixture was stirred at rt for 35 min (**2a**), 10 min (**2b**) or 15 h (**2c**) and the solvent was removed under reduced pressure. Complexes **2a** and **2c** were washed with pentane (2 x 5 mL) and dried under vacuum. Compounds **2a** and **2c** can be crystallized by slow diffusion of a concentrated solution of **2a** or **2c** in CH<sub>2</sub>Cl<sub>2</sub> into pentane (Yields: **2a**: 76%; **2c**: 81%). Complex **2b** proved to be extremely sensitive to trace amounts of water present in the solvents used during the attempts of purification, leading to hydride Pt(II) complex [Pt(H)(I<sup>t</sup>Bu'Pr)<sub>2</sub>][BAR<sup>F</sup>]<sup>[3]</sup> (together with HOBcat) and could not be isolated in pure form. This complex can be prepared and spectroscopically characterized *in situ*. Alternatively, it can be prepared in higher spectroscopic purity using the following method: complex **1** (80 mg, 0.057 mmol) was suspended in 3 mL of dry pentane in a vial inside the glove-box. Then HOBcat (0.063 mmol) was added, the vial was closed and the suspension was stirred for 24 h at rt. The solvent was decanted and the off-white solid dried under vacuum. Under these reaction conditions the amounts of boron by-products resulting from hydrolysis of complex **2b** are considerably lower, but still present.

**Complex 2a:** <sup>1</sup>H-NMR (300 MHz, CD<sub>2</sub>Cl<sub>2</sub>, 25 °C): δ = 7.74 (br, 8H, H<sub>ortho</sub>-BAR<sup>F</sup>), 7.58 (br, 4H, H<sub>para</sub>-BAR<sup>F</sup>), 7.19 (br, 2H, =CH), 7.06 (d, 2H, J<sub>H,H</sub> = 1.4 Hz, =CH), 5.96 (sept, 2H, J<sub>H,H</sub> = 6.8 Hz, CH(CH<sub>3</sub>)<sub>2</sub>), 1.90 (s, 18H, <sup>t</sup>Bu), 1.50 (d, 12H, J<sub>H,H</sub> = 6.8 Hz, CH(CH<sub>3</sub>)<sub>2</sub>), 0.96 (s, 12H, CH<sub>3</sub>-Bpin). <sup>13</sup>C{<sup>1</sup>H} NMR (100 MHz, CD<sub>2</sub>Cl<sub>2</sub>, 25 °C): δ = 177.5 (Pt=C), 162.4 (q, J<sub>C,B</sub> = 50 Hz, C<sub>ipso</sub>-BAR<sup>F</sup>), 135.2 (br, C<sub>ortho</sub>-BAR<sup>F</sup>), 129.3 (br q, J<sub>C,F</sub> = 31 Hz, C<sub>meta</sub>-BAR<sup>F</sup>), 125.0 (q, J<sub>C,F</sub> = 272 Hz, CF<sub>3</sub>-BAR<sup>F</sup>), 120.5 (br, =CH), 117.9 (br, C<sub>para</sub>-BAR<sup>F</sup>), 116.1 (s+d, J<sub>Pt,C</sub> = 32 Hz, =CH), 83.8 (s+d, J<sub>Pt,C</sub> = 47 Hz, C<sub>q</sub>-Bpin), 59.3 (C<sub>q</sub>-<sup>t</sup>Bu), 54.5 (CH(CH<sub>3</sub>)<sub>2</sub>), 32.2 (<sup>t</sup>Bu), 24.9 (CH<sub>3</sub>-Bpin), 23.4 (CH(CH<sub>3</sub>)<sub>2</sub>). <sup>11</sup>B{<sup>1</sup>H}(128 MHz, CD<sub>2</sub>Cl<sub>2</sub>, 25 °C): δ = 12.7 (br s+d, J<sub>Pt,B</sub> = 1483 Hz, Pt-Bpin), -6.6 (s, BAR<sup>F</sup>). **Elemental analysis calcd (%) for C<sub>58</sub>H<sub>60</sub>B<sub>2</sub>F<sub>24</sub>N<sub>4</sub>O<sub>2</sub>Pt:** C, 45.90; H, 3.98; N, 3.69; **Found:** C, 45.7; H, 4.1; N, 3.78.

**Complex 2b:** <sup>1</sup>H-NMR (400 MHz, CD<sub>2</sub>Cl<sub>2</sub>, 25 °C): δ = 7.74 (br, 8H, H<sub>ortho</sub>-BAR<sup>F</sup>), 7.57 (br, 4H, H<sub>para</sub>-BAR<sup>F</sup>), 7.24 and 7.14 (d, 2H each, J<sub>H,H</sub> = 1.9 Hz, =CH), 7.00 and 6.92 (m, 2H each, CH-Bcat), 5.96 (sept, 2H, J<sub>H,H</sub> = 6.7 Hz, CH(CH<sub>3</sub>)<sub>2</sub>), 1.87 (s, 18H, <sup>t</sup>Bu), 1.53 (d, 12H, J<sub>H,H</sub> = 6.7 Hz, CH(CH<sub>3</sub>)<sub>2</sub>). <sup>13</sup>C{<sup>1</sup>H} NMR (100 MHz, CD<sub>2</sub>Cl<sub>2</sub>, 25 °C): δ = 173.5 (Pt=C), 162.2 (q, J<sub>C,B</sub> = 50 Hz, C<sub>ipso</sub>-BAR<sup>F</sup>), 149.0 (C<sub>q</sub>-Bcat), 135.3 (br, C<sub>ortho</sub>-BAR<sup>F</sup>), 129.2 (br q, J<sub>C,F</sub> = 30 Hz, C<sub>meta</sub>-BAR<sup>F</sup>), 125.0 (q, J<sub>C,F</sub> = 272 Hz, CF<sub>3</sub>-BAR<sup>F</sup>), 122.5 (CH-Bcat), 121.2 (br, =CH), 117.9 (br, C<sub>para</sub>-BAR<sup>F</sup>), 116.6 (br, =CH), 111.9 (CH-Bcat), 59.4 (C<sub>q</sub>-<sup>t</sup>Bu), 55.1 (CH(CH<sub>3</sub>)<sub>2</sub>), 32.0 (<sup>t</sup>Bu), 23.3 (CH(CH<sub>3</sub>)<sub>2</sub>). <sup>11</sup>B{<sup>1</sup>H}(128 MHz, CD<sub>2</sub>Cl<sub>2</sub>, 25 °C): δ = 14.7 (br s+d, J<sub>Pt,B</sub> = 1695 Hz, Pt-Bcat), -6.6 (s, BAR<sup>F</sup>).

**Complex 2c:** <sup>1</sup>H-NMR (300 MHz, CD<sub>2</sub>Cl<sub>2</sub>, 25 °C): δ = 7.75 (br, 8H, H<sub>ortho</sub>-BAR<sup>F</sup>), 7.58 (br, 4H, H<sub>para</sub>-BAR<sup>F</sup>), 7.25 and 7.05 (d, 2H each, J<sub>H,H</sub> = 1.8 Hz, =CH), 6.86 and 6.77 (m, 2H each, CH-Bdab), 5.66 (br, 2H, NH), 5.36 (br, 2H, CH(CH<sub>3</sub>)<sub>2</sub>), 1.93 (s, 18H, <sup>t</sup>Bu), 1.26 (d, 12H, J<sub>H,H</sub> = 6.8 Hz, CH(CH<sub>3</sub>)<sub>2</sub>). <sup>13</sup>C{<sup>1</sup>H} NMR (100 MHz, CD<sub>2</sub>Cl<sub>2</sub>, 25 °C): δ = 179.8 (Pt=C), 162.2 (q, J<sub>C,B</sub> = 50 Hz, C<sub>ipso</sub>-BAR<sup>F</sup>), 136.3 (C<sub>q</sub>-Bdab),

135.2 (br, C<sub>ortho</sub>-BAR<sup>F</sup>), 129.3 (br q, J<sub>C,F</sub> = 34 Hz, C<sub>meta</sub>-BAR<sup>F</sup>), 125.0 (q, J<sub>C,F</sub> = 272 Hz, CF<sub>3</sub>-BAR<sup>F</sup>), 120.6 (br, =CH), 119.4 (CH-Bdab), 117.9 (br, C<sub>para</sub>-BAR<sup>F</sup>), 116.1 (br, =CH), 110.4 (CH-Bdab), 59.3 (C<sub>q</sub>-<sup>t</sup>Bu), 55.1 (CH(CH<sub>3</sub>)<sub>2</sub>), 32.8 (<sup>t</sup>Bu), 23.0 (CH(CH<sub>3</sub>)<sub>2</sub>). <sup>11</sup>B{<sup>1</sup>H}(128 MHz, CD<sub>2</sub>Cl<sub>2</sub>, 25 °C): δ = 8.8 (br s+d, J<sub>Pt,B</sub> = 1390 Hz, Pt-Bdab), -6.6 (s, BAR<sup>F</sup>). **Elemental analysis calcd (%) for C<sub>58</sub>H<sub>54</sub>B<sub>2</sub>F<sub>24</sub>N<sub>6</sub>Pt:** C, 46.20; H, 3.61; N, 5.57; **Found:** C, 46.1; H, 3.7; N, 5.7.

### 3. Synthesis and spectroscopic data for complexes 3a-c.

*General procedure:* Complex **1** (70 mg, 0.050 mmol) was dissolved in 0.4 mL of dry CD<sub>2</sub>Cl<sub>2</sub> in a screw-cap NMR tube and cooled to -78 °C. Then, a borane solution (0.060 mmol in 0.2 mL of CD<sub>2</sub>Cl<sub>2</sub>) was transferred via cannula into the NMR tube, and the mixture was shaken at -78 °C. The sample was analyzed by NMR in a pre-cooled (-30 °C) NMR apparatus.

**Complex 3a:** <sup>1</sup>H-NMR (400 MHz, CD<sub>2</sub>Cl<sub>2</sub>, -30 °C): δ = 7.74 (br, 8H, H<sub>ortho</sub>-BAR<sup>F</sup>), 7.57 (br, 4H, H<sub>para</sub>-BAR<sup>F</sup>), 7.25, 7.07, 7.04 and 7.02 (br, 1H each, =CH), 5.00 (br, 1H, CH(CH<sub>3</sub>)<sub>2</sub>), 4.70 (sept, 1H, J<sub>H,H</sub> = 6.0 Hz, CH(CH<sub>3</sub>)<sub>2</sub>), 2.28 (d+d, 1H, J<sub>H,H</sub> = 12.0 Hz, J<sub>Pt,H</sub> = 60.0 Hz, Pt-CH<sub>a</sub>CH<sub>b</sub>), 2.10 (d+d, 1H, J<sub>H,H</sub> = 12.0 Hz, J<sub>Pt,H</sub> ~ 85 Hz, Pt-CH<sub>a</sub>CH<sub>b</sub>), 1.66 (s, 9H, <sup>t</sup>Bu), 1.57-1.43 (m, 12H, CH(CH<sub>3</sub>)<sub>2</sub>), 1.39 (s, 3H, CH<sub>3</sub>) and 1.30 (br, 3H, CH<sub>3</sub>), 1.15 and 1.08 (s, 6H each, CH<sub>3</sub>-Bpin), -3.93 (s+d, 1H, <sup>1</sup>J<sub>Pt,H</sub> = 357.0 Hz, H-Bpin). <sup>13</sup>C{<sup>1</sup>H} NMR (100 MHz, CD<sub>2</sub>Cl<sub>2</sub>, -30 °C): δ = 167.0 and 164.9 (Pt=C), 161.7 (q, J<sub>C,B</sub> = 50 Hz, C<sub>ipso</sub>-BAR<sup>F</sup>), 134.7 (br, C<sub>ortho</sub>-BAR<sup>F</sup>), 128.7 (br q, J<sub>C,F</sub> = 34 Hz, C<sub>meta</sub>-BAR<sup>F</sup>), 124.5 (q, J<sub>C,F</sub> = 272 Hz, CF<sub>3</sub>-BAR<sup>F</sup>), 120.7 (=CH), 117.5 (br, C<sub>para</sub>-BAR<sup>F</sup>), 117.1, 116.5 and 116.0 (=CH), 85.4 (C<sub>q</sub>-Bpin), 65.5 and 58.4 (C<sub>q</sub>-<sup>t</sup>Bu), 53.8 and 53.3 (CH(CH<sub>3</sub>)<sub>2</sub>), 36.9 (Pt-CH<sub>2</sub>), 33.1 (Pt-CH<sub>2</sub>-C(CH<sub>3</sub>)), 31.1 (<sup>t</sup>Bu), 28.1 (CH<sub>3</sub>), 24.7 (2 x CH<sub>3</sub>-Bpin), 24.6, 24.3 and 23.7 (CH<sub>3</sub>), 23.0 (2 x CH<sub>3</sub>-Bpin), 21.5 (CH<sub>3</sub>). <sup>11</sup>B{<sup>1</sup>H}(128 MHz, CD<sub>2</sub>Cl<sub>2</sub>, -30 °C): δ = 21.8 (br, Pt-H-Bpin), -6.8 (s, BAR<sup>F</sup>).

**Complex 3b:** <sup>1</sup>H-NMR (400 MHz, CD<sub>2</sub>Cl<sub>2</sub>, -30 °C): δ = 7.76 (br, 8H, H<sub>ortho</sub>-BAR<sup>F</sup>), 7.57 (br, 4H, H<sub>para</sub>-BAR<sup>F</sup>), 7.34, 7.21, 7.17 and 7.14 (br, 1H each, =CH), 7.09 and 7.06 (br, 2H each, HBcat), 4.76 (br, 2H, CH(CH<sub>3</sub>)<sub>2</sub>), 2.48 (d+d, 1H, J<sub>H,H</sub> = 12.0 Hz, J<sub>Pt,H</sub> = 57.6 Hz, Pt-CH<sub>a</sub>CH<sub>b</sub>), 2.32 (d+d, 1H, J<sub>H,H</sub> = 12.0 Hz, J<sub>Pt,H</sub> = 88.3 Hz, Pt-CH<sub>a</sub>CH<sub>b</sub>), 1.72 (s, 9H, <sup>t</sup>Bu), 1.66 (d, 3H, J<sub>H,H</sub> = 6.0 Hz, CH(CH<sub>3</sub>)<sub>2</sub>), 1.55 (s, 3H, CH<sub>3</sub>), 1.41 (br, 6H, CH(CH<sub>3</sub>)<sub>2</sub>), 1.35 (br, 6H, CH<sub>3</sub> + CH(CH<sub>3</sub>)<sub>2</sub>), -3.28 (s+d, 1H, <sup>1</sup>J<sub>Pt,H</sub> = 327.5 Hz, H-Bpin). <sup>13</sup>C{<sup>1</sup>H} NMR (100 MHz, CD<sub>2</sub>Cl<sub>2</sub>, -30 °C): δ = 166.3 and 163.0 (Pt=C), 161.7 (q, J<sub>C,B</sub> = 50 Hz, C<sub>ipso</sub>-BAR<sup>F</sup>), 148.6 (C<sub>q</sub>-Bcat), 134.7 (br, C<sub>ortho</sub>-BAR<sup>F</sup>), 128.7 (br q, J<sub>C,F</sub> = 34 Hz, C<sub>meta</sub>-BAR<sup>F</sup>), 124.5 (q, J<sub>C,F</sub> = 272 Hz, CF<sub>3</sub>-BAR<sup>F</sup>), 123.1 (CH-Bcat), 121.0, 117.8, 117.2 and 116.6 (=CH), 117.5 (br, C<sub>para</sub>-BAR<sup>F</sup>), 112.2 (CH-Bcat), 65.8 (s+d, J<sub>Pt,C</sub> = 21 Hz, C<sub>q</sub>-<sup>t</sup>Bu), 58.7 (C<sub>q</sub>-<sup>t</sup>Bu), 54.2 and 53.4 (CH(CH<sub>3</sub>)<sub>2</sub>), 39.3 (s+d, J<sub>Pt,C</sub> = 650 Hz, Pt-CH<sub>2</sub>), 33.1 (Pt-CH<sub>2</sub>-C(CH<sub>3</sub>)), 31.3 (<sup>t</sup>Bu), 28.2 (s+d, J<sub>Pt,C</sub> = 50 Hz, Pt-CH<sub>2</sub>-C(CH<sub>3</sub>)), 24.7, 24.2, 22.6 and 21.8 (CH(CH<sub>3</sub>)<sub>2</sub>). <sup>11</sup>B{<sup>1</sup>H}(128 MHz, CD<sub>2</sub>Cl<sub>2</sub>, -30 °C): δ = 21.3 (br, Pt-H-Bcat), -6.7 (s, BAR<sup>F</sup>).

**Complex 3c:** <sup>1</sup>H-NMR (400 MHz, CD<sub>2</sub>Cl<sub>2</sub>, -30 °C): δ = 7.75 (br, 8H, H<sub>ortho</sub>-BAR<sup>F</sup>), 7.57 (br, 4H, H<sub>para</sub>-BAR<sup>F</sup>), 7.25, 7.13, 7.09 and 6.96 (br, 1H each, =CH), 7.01 and 6.93 (br, 2H each, HBdab), 6.45 (br, 2H, NH), 4.84 and 4.67 (br, 1H each, CH(CH<sub>3</sub>)<sub>2</sub>), 2.31 (d+d, 1H, J<sub>H,H</sub> = 12.0 Hz, J<sub>Pt,H</sub> ~ 87 Hz, Pt-CH<sub>a</sub>CH<sub>b</sub>),

2.22 (d+d, 1H,  $J_{H,H} = 12.0$  Hz,  $J_{Pt,H} \sim 68$  Hz, Pt-CH<sub>a</sub>CH<sub>b</sub>), 1.79 (s, 9H, <sup>t</sup>Bu), 1.55-1.53 (m, 6H, CH<sub>3</sub> + CH(CH<sub>3</sub>)<sub>2</sub>), 1.42-1.39 (m, 6H, CH<sub>3</sub> + CH(CH<sub>3</sub>)<sub>2</sub>), 1.28 (d, 3H,  $J_{H,H} = 6.0$  Hz, CH(CH<sub>3</sub>)<sub>2</sub>), 0.63 (d, 3H,  $J_{H,H} = 6.0$  Hz, CH(CH<sub>3</sub>)<sub>2</sub>), -2.32 (s+d, 1H,  $^1J_{Pt,H} = 339.2$  Hz, H-Bdab). <sup>13</sup>C{<sup>1</sup>H} NMR (100 MHz, CD<sub>2</sub>Cl<sub>2</sub>, -30 °C):  $\delta = 167.6$  and  $164.6$  (Pt=C),  $161.7$  (q,  $J_{C,B} = 50$  Hz, C<sub>ipso</sub>-BAr<sup>F</sup>),  $135.8$  (C<sub>q</sub>-Bdab),  $134.6$  (br, C<sub>ortho</sub>-BAr<sup>F</sup>),  $128.7$  (br q,  $J_{C,F} = 34$  Hz, C<sub>meta</sub>-BAr<sup>F</sup>),  $124.5$  (q,  $J_{C,F} = 272$  Hz, CF<sub>3</sub>-BAr<sup>F</sup>),  $120.6$  (=CH),  $120.2$  (CH-Bdab),  $117.6$  (=CH),  $117.5$  (br, C<sub>para</sub>-BAr<sup>F</sup>),  $116.7$  and  $116.0$  (=CH),  $111.2$  (CH-Bdab),  $65.8$  and  $58.6$  (C<sub>q</sub>-<sup>t</sup>Bu),  $53.3$  and  $52.9$  (CH(CH<sub>3</sub>)<sub>2</sub>),  $34.2$  (Pt-CH<sub>2</sub>),  $32.8$  (Pt-CH<sub>2</sub>-C(CH<sub>3</sub>)),  $31.0$  (<sup>t</sup>Bu),  $28.4$ ,  $24.9$ ,  $23.8$ ,  $21.9$  and  $21.7$  (CH<sub>3</sub>). <sup>11</sup>B{<sup>1</sup>H}(128 MHz, CD<sub>2</sub>Cl<sub>2</sub>, -30 °C):  $\delta = 18.6$  (br, Pt-H-Bdab),  $-6.7$  (s, BAr<sup>F</sup>).

#### 4. Synthesis and spectroscopic data for complex 4a.

Complex **3a**, as prepared in the previous section, was allowed to stand for 70 min at -5 °C and the NMR data was recorded between -5 to 0 °C.

**Complex 4a:** <sup>1</sup>H-NMR (400 MHz, CD<sub>2</sub>Cl<sub>2</sub>, -5 °C):  $\delta = 7.74$  (br, 8H, H<sub>ortho</sub>-BAr<sup>F</sup>),  $7.58$  (br, 4H, H<sub>para</sub>-BAr<sup>F</sup>),  $7.15$  (br, 2H, =CH),  $7.05$  and  $7.01$  (d, 1H each,  $J_{H,H} = 1.3$  Hz, =CH),  $5.80$  (sept, 1H,  $J_{H,H} = 6.7$  Hz, CH(CH<sub>3</sub>)<sub>2</sub>),  $5.63$  (sept, 1H,  $J_{H,H} = 6.6$  Hz, CH(CH<sub>3</sub>)<sub>2</sub>),  $2.44$  (br, 2H, CH<sub>2</sub>-Bpin),  $1.83$  (s, 9H, <sup>t</sup>Bu),  $1.66$  (s, 6H, CH<sub>3</sub>),  $1.45$  (d, 6H,  $J_{H,H} = 6.6$  Hz, CH(CH<sub>3</sub>)<sub>2</sub>),  $1.40$  (d, 6H, d, 6H,  $J_{H,H} = 6.7$  Hz, CH(CH<sub>3</sub>)<sub>2</sub>),  $1.04$  (s, 12H, CH<sub>3</sub>-Bpin),  $-27.11$  (s+d, 1H,  $^1J_{Pt,H} = 2167.0$  Hz, Pt-H). <sup>13</sup>C{<sup>1</sup>H} NMR (100 MHz, CD<sub>2</sub>Cl<sub>2</sub>, 0 °C):  $\delta = 170.9$  and  $169.9$  (Pt=C),  $161.9$  (q,  $J_{C,B} = 50$  Hz, C<sub>ipso</sub>-BAr<sup>F</sup>),  $135.0$  (br, C<sub>ortho</sub>-BAr<sup>F</sup>),  $129.0$  (br q,  $J_{C,F} = 32$  Hz, C<sub>meta</sub>-BAr<sup>F</sup>),  $124.8$  (q,  $J_{C,F} = 272$  Hz, CF<sub>3</sub>-BAr<sup>F</sup>),  $120.0$  and  $119.8$  (=CH),  $117.8$  (br, C<sub>para</sub>-BAr<sup>F</sup>),  $116.5$  and  $115.1$  (=CH),  $86.1$  (C<sub>q</sub>-Bpin),  $60.1$  and  $58.5$  (C<sub>q</sub>-<sup>t</sup>Bu and C<sub>q</sub>(CH<sub>3</sub>)<sub>2</sub>-CH<sub>2</sub>Bpin),  $54.7$  and  $54.2$  (CH(CH<sub>3</sub>)<sub>2</sub>),  $32.1$  (2 x CH<sub>3</sub>),  $31.1$  (<sup>t</sup>Bu),  $24.3$  (CH<sub>3</sub>-Bpin),  $22.8$  and  $22.7$  (CH(CH<sub>3</sub>)<sub>2</sub>). The broad signal for the -CH<sub>2</sub>-Bpin fragment has been observed by means of an HMQC experiment. <sup>11</sup>B{<sup>1</sup>H}(128 MHz, CD<sub>2</sub>Cl<sub>2</sub>, 0 °C):  $\delta = 32.9$  (br, -CH<sub>2</sub>-Bpin),  $-6.7$  (s, BAr<sup>F</sup>).

#### 5. Synthesis and spectroscopic and analytical data for complex 5.

Complex **5** was prepared by addition of <sup>t</sup>BuNC (6.2  $\mu$ L, 0.055 mmol), to a solution of complex **4a** synthesized at low temperature as described in the previous section. After stirring for 15 min at rt, the solvent was removed under vacuum and the resulting white solid washed with pentane (2 x 5 mL). Crystals of complex **5** were obtained by slow diffusion of a concentrated solution of **5** in CH<sub>2</sub>Cl<sub>2</sub> into hexamethyldisiloxane in 45 % yield.

**Complex 5:** <sup>1</sup>H-NMR (400 MHz, CD<sub>2</sub>Cl<sub>2</sub>, 25 °C):  $\delta = 7.75$  (br, 8H, H<sub>ortho</sub>-BAr<sup>F</sup>),  $7.58$  (br, 4H, H<sub>para</sub>-BAr<sup>F</sup>),  $7.27$  and  $7.22$  (d, 1H each,  $J_{H,H} = 1.8$  Hz, =CH),  $7.04$  and  $7.02$  (d, 1H each,  $J_{H,H} = 1.9$  Hz, =CH),  $5.53$  (br, 2H, CH(CH<sub>3</sub>)<sub>2</sub>),  $2.21$  (br, 1H, CH<sub>2</sub>-Bpin),  $1.87$  (s, 6H, CH<sub>2</sub>-C<sub>q</sub>(CH<sub>3</sub>)<sub>2</sub>),  $1.81$  (s, 9H, <sup>t</sup>Bu),  $1.45$  (d, 6H,  $J_{H,H} = 6.9$  Hz, CH(CH<sub>3</sub>)<sub>2</sub>),  $1.43$  (d, 6H,  $J_{H,H} = 7.1$  Hz, CH(CH<sub>3</sub>)<sub>2</sub>),  $1.31$  (s, 9H, <sup>t</sup>BuNC),  $1.19$  (s, 12H, CH<sub>3</sub>-Bpin),  $-7.92$  (t+d, 1H,  $J_{H,H} = 5.2$  Hz,  $^1J_{Pt,H} = 1132.5$  Hz, Pt-H) (one of the diastereotopic CH<sub>2</sub>-Bpin broad resonances is not observed). <sup>13</sup>C{<sup>1</sup>H} NMR (100 MHz, CD<sub>2</sub>Cl<sub>2</sub>, 25 °C):  $\delta = 161.7$  (q,  $J_{C,B} = 50$  Hz, C<sub>ipso</sub>-

BAR<sup>F</sup>), 160.7 (br, 2 Pt=C, detected by HMBC), 135.8 (br, C<sub>ortho</sub>-BAR<sup>F</sup>), 128.9 (br q, J<sub>C,F</sub> = 32 Hz, C<sub>meta</sub>-BAR<sup>F</sup>), 124.6 (q, J<sub>C,F</sub> = 272 Hz, CF<sub>3</sub>-BAR<sup>F</sup>), 120.2 and 119.8 (=CH), 117.5 (br, C<sub>para</sub>-BAR<sup>F</sup>), 114.9 and 114.3 (s+d, J<sub>Pt,C</sub> ~ 28 Hz, =CH), 83.3 (C<sub>q</sub>-Bpin), 59.8 (C<sub>q</sub>-<sup>t</sup>Bu), 58.0 (C<sub>q</sub>-<sup>t</sup>BuNC), 57.8 (C<sub>q</sub>(CH<sub>3</sub>)<sub>2</sub>-CH<sub>2</sub>Bpin), 54.0 and 53.9 (CH(CH<sub>3</sub>)<sub>2</sub>), 30.2 (br, 2 x CH<sub>3</sub> and <sup>t</sup>Bu), 29.5 (<sup>t</sup>BuNC), 24.5 (CH<sub>3</sub>-Bpin), 22.4 (br, CH(CH<sub>3</sub>)<sub>2</sub>). The signal of the CH<sub>2</sub>-B fragment has not been identified. <sup>11</sup>B{<sup>1</sup>H}(128 MHz, CD<sub>2</sub>Cl<sub>2</sub>, 25 °C): δ = 32.7 (br, -CH<sub>2</sub>-Bpin), -6.6 (s, BAR<sup>F</sup>). **Elemental analysis calcd (%) for C<sub>63</sub>H<sub>69</sub>B<sub>2</sub>F<sub>24</sub>N<sub>5</sub>O<sub>2</sub>Pt: C, 47.21; H, 4.34; N, 4.37; Found: C, 47.4; H, 4.3; N, 4.5.**

## 6. NMR spectra.

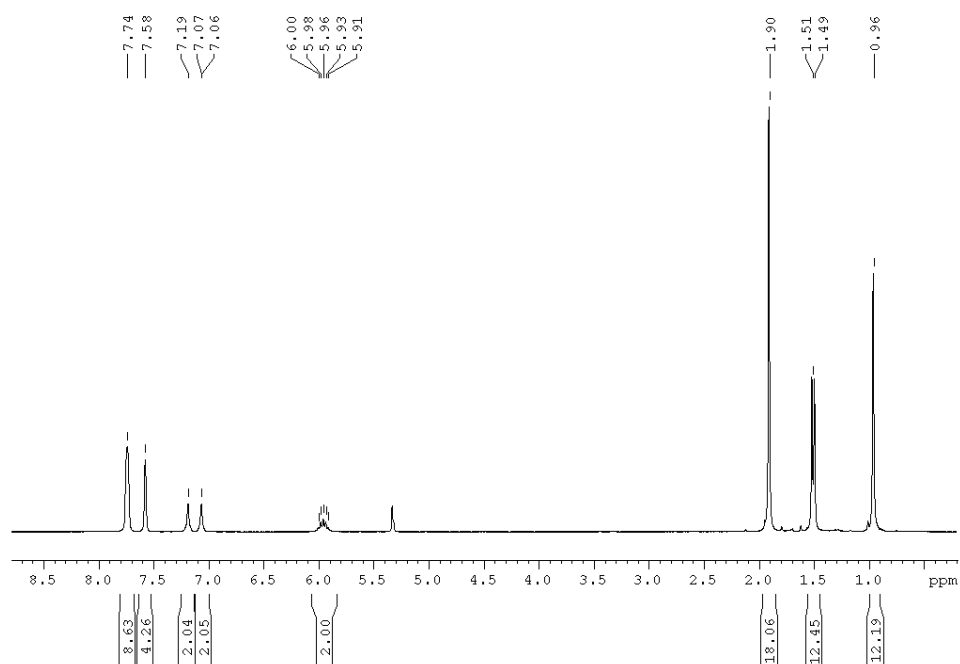

Figure S1. <sup>1</sup>H NMR (300 MHz) of complex **2a** in CD<sub>2</sub>Cl<sub>2</sub>.

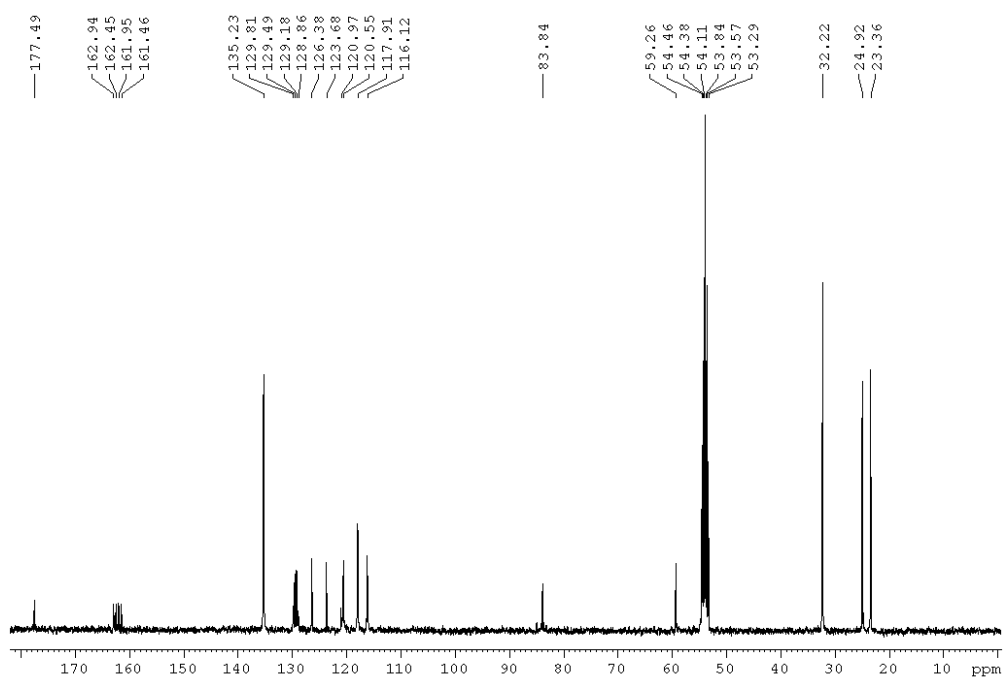

Figure S2.  $^{13}\text{C}\{^1\text{H}\}$  NMR (100 MHz) of **2a** in  $\text{CD}_2\text{Cl}_2$ .

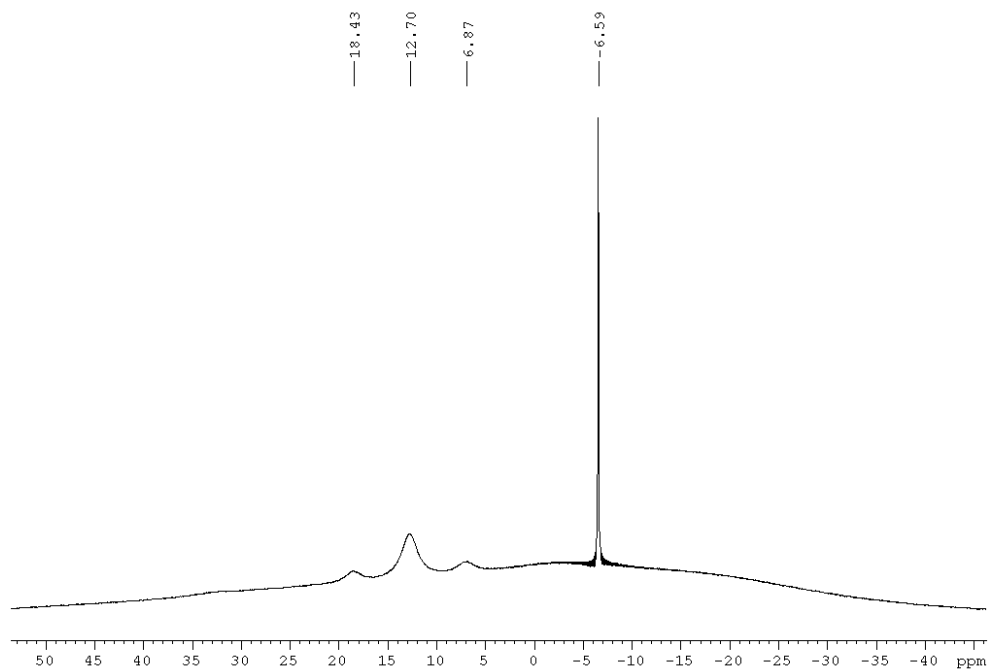

Figure S3.  $^{11}\text{B}\{^1\text{H}\}$  NMR (128 MHz) of **2a** in  $\text{CD}_2\text{Cl}_2$ .

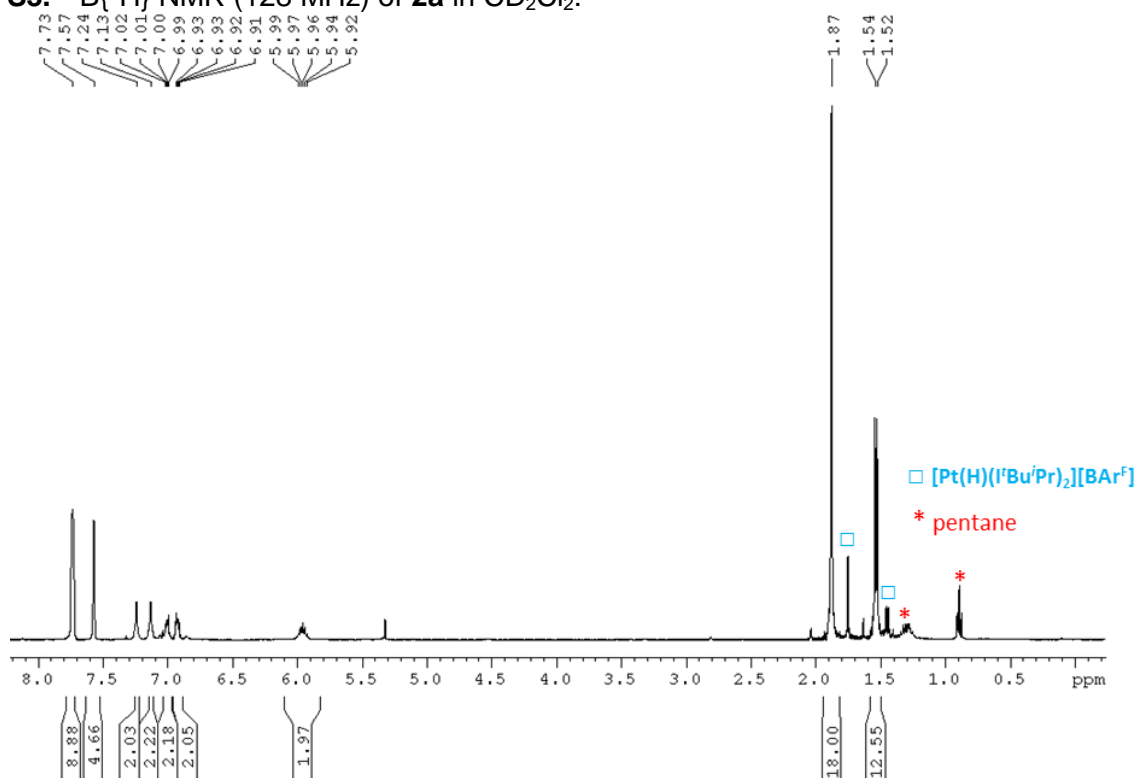

Figure S4.  $^1\text{H}$  NMR (400 MHz) of complex **2b** in  $\text{CD}_2\text{Cl}_2$ .

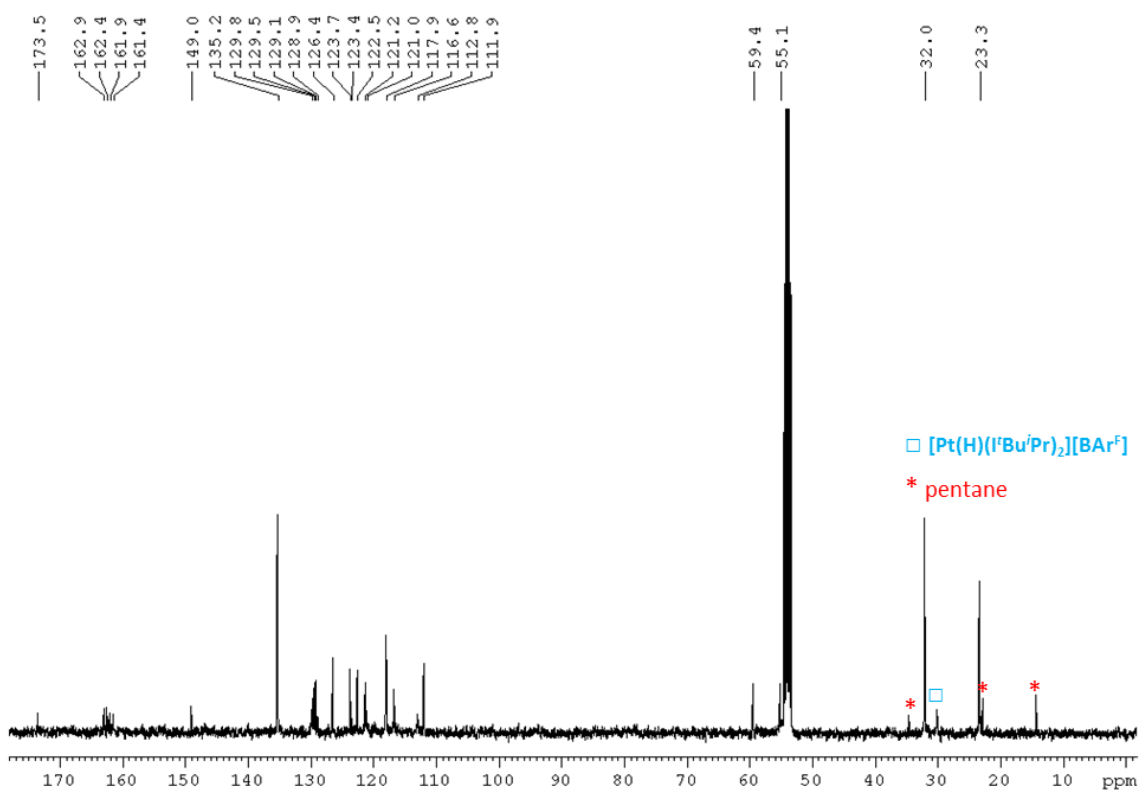

Figure S5.  $^{13}\text{C}\{^1\text{H}\}$  NMR (100 MHz) of **2b** in  $\text{CD}_2\text{Cl}_2$ .

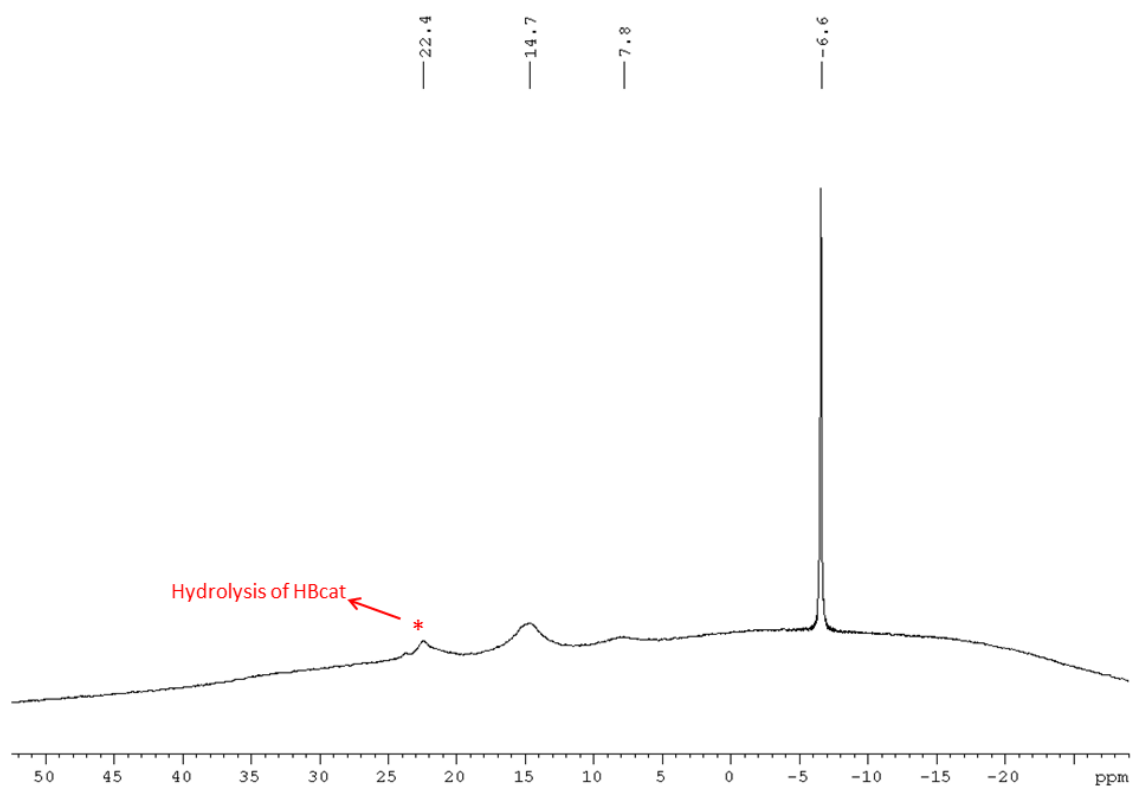

Figure S6.  $^{11}\text{B}\{^1\text{H}\}$  NMR (128 MHz) of **2b** in  $\text{CD}_2\text{Cl}_2$ .



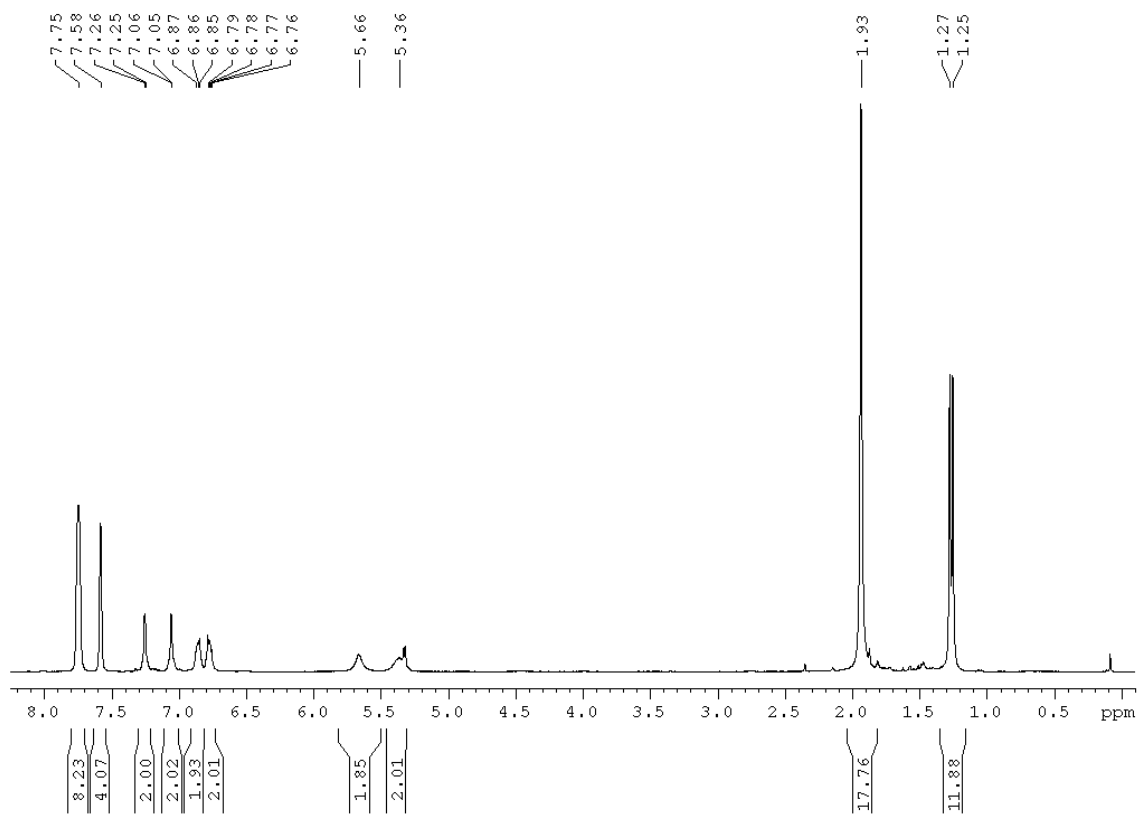

Figure S7.  $^1\text{H}$  NMR (400 MHz) of complex **2c** in  $\text{CD}_2\text{Cl}_2$ .

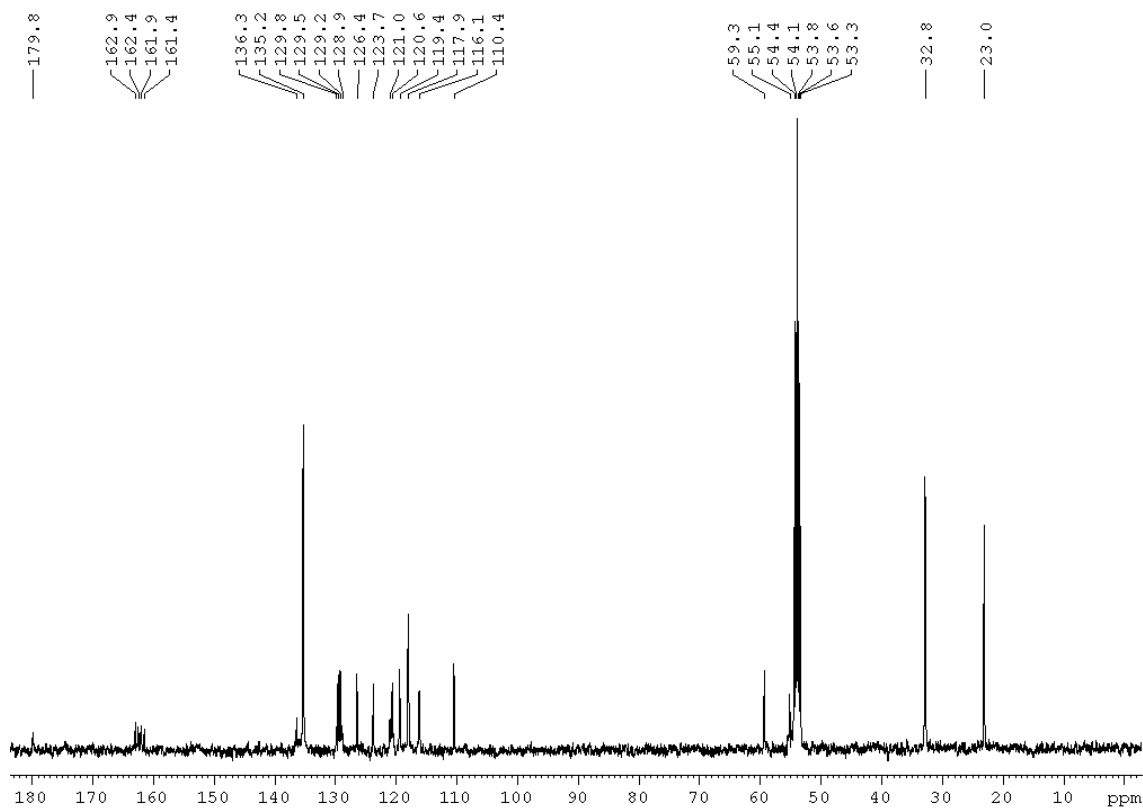

$^{13}\text{C}\{^1\text{H}\}$  NMR (100 MHz) of **2c** in  $\text{CD}_2\text{Cl}_2$ .

Figure S8.

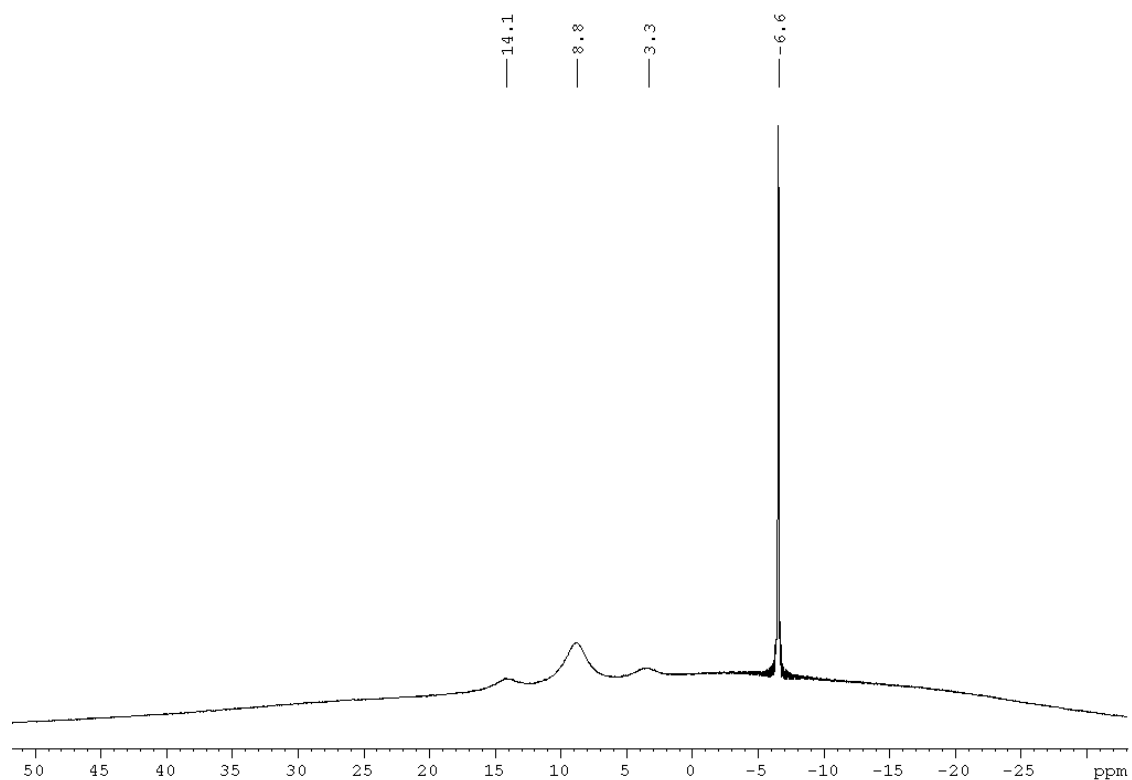

Figure S9.  $^{11}\text{B}\{^1\text{H}\}$  NMR (128 MHz) of **2c** in  $\text{CD}_2\text{Cl}_2$ .

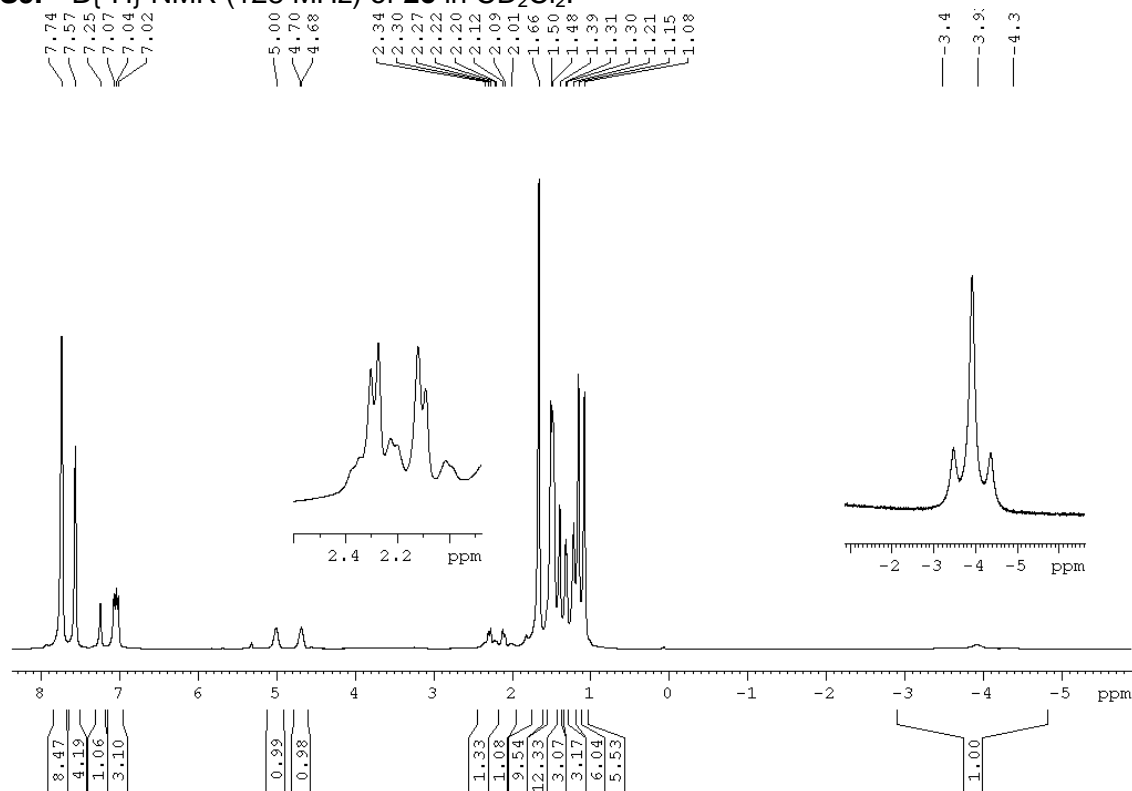

Figure S10.  $^1\text{H}$  NMR (400 MHz) of complex **3a** in  $\text{CD}_2\text{Cl}_2$  at  $-30\text{ }^\circ\text{C}$ .

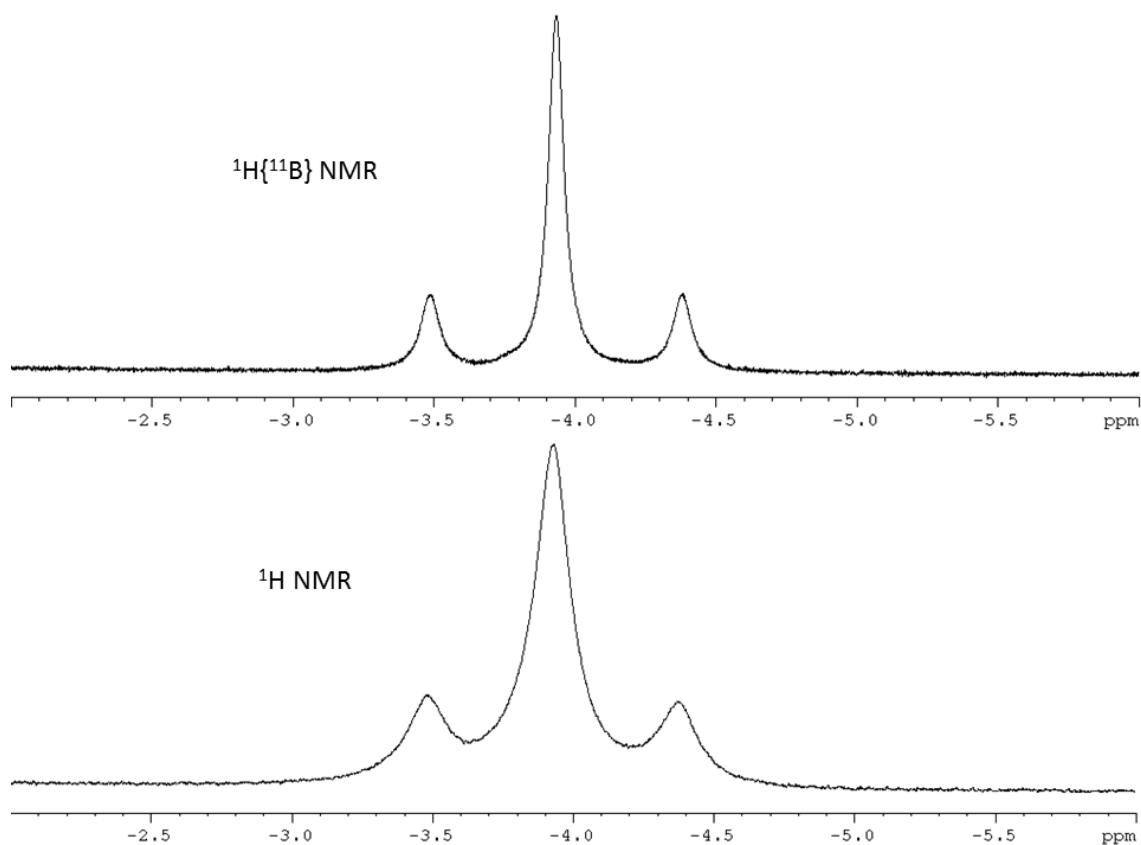

**Figure S11.** Comparative figure of the  $^1\text{H}$  (bottom) and  $^1\text{H}\{^{11}\text{B}\}$ (top) NMR (400 MHz) spectra of the hydride resonance of complex **3a** in  $\text{CD}_2\text{Cl}_2$  at  $-30^\circ\text{C}$ .

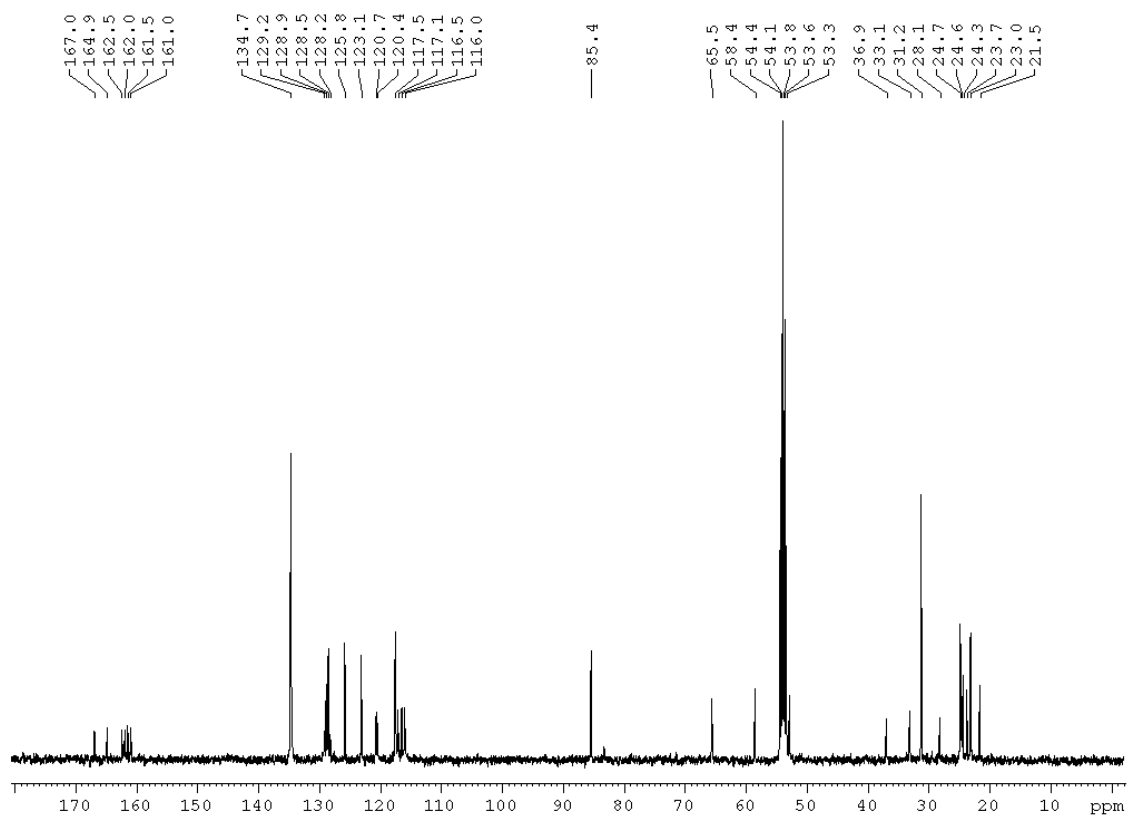

**Figure S12.**  $^{13}\text{C}\{^1\text{H}\}$  NMR (100 MHz) of **3a** in  $\text{CD}_2\text{Cl}_2$  at  $-30^\circ\text{C}$ .

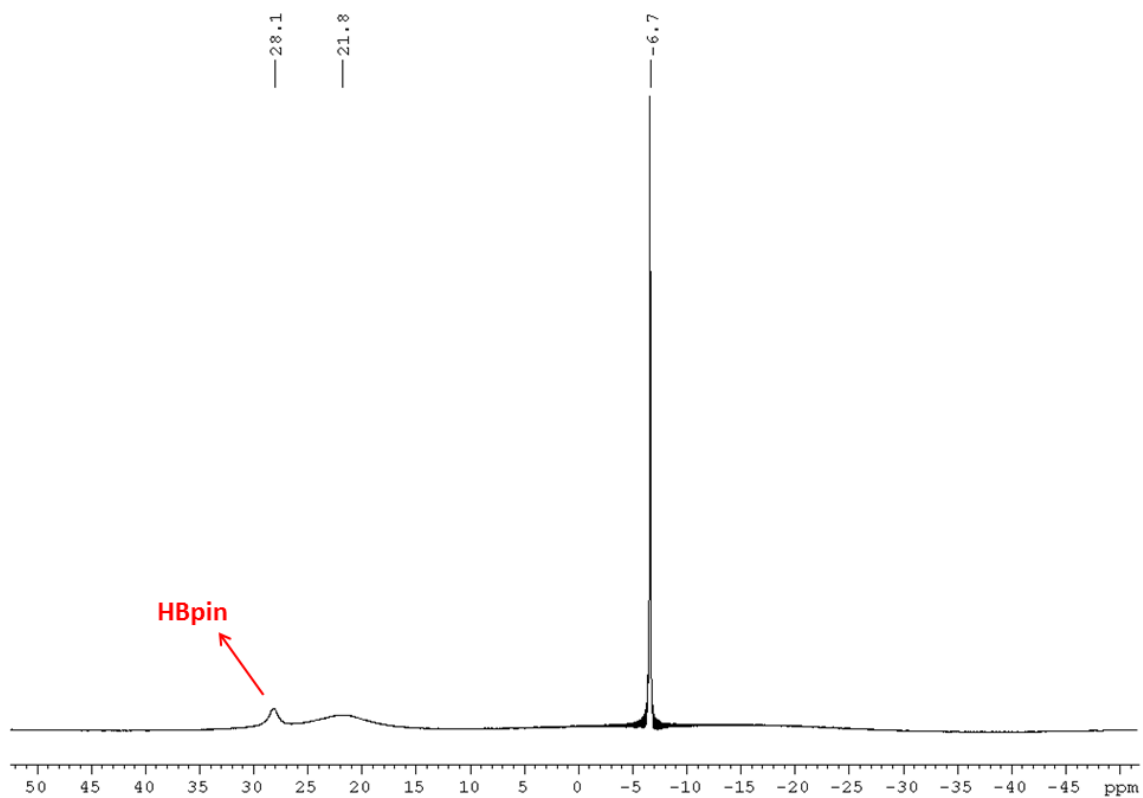

Figure S13.  $^{11}\text{B}\{^1\text{H}\}$  NMR (128 MHz) of **3a** in  $\text{CD}_2\text{Cl}_2$  at  $-30\text{ }^\circ\text{C}$ .

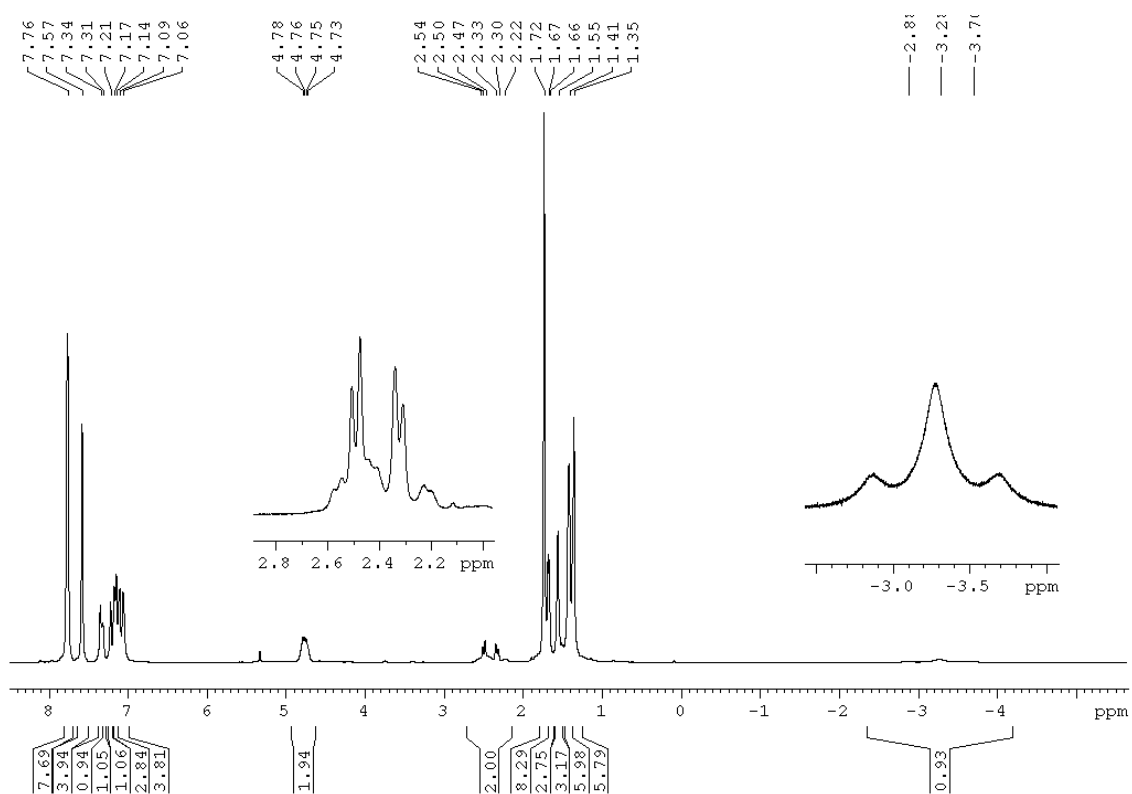

Figure S14.  $^1\text{H}$  NMR (400 MHz) of complex **3b** in  $\text{CD}_2\text{Cl}_2$  at  $-30\text{ }^\circ\text{C}$ .

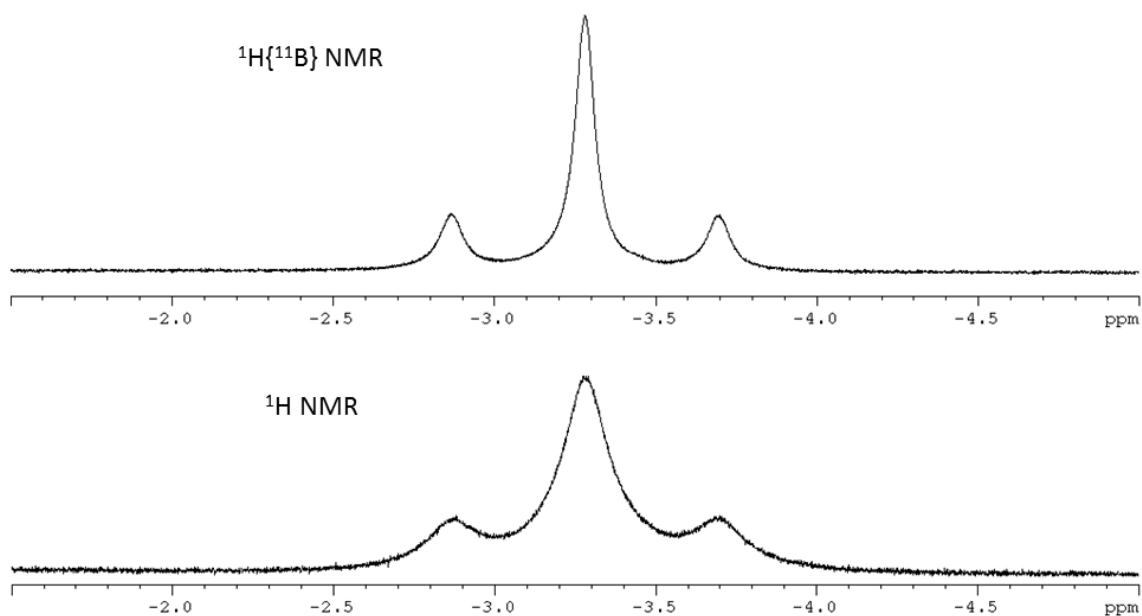

**Figure S15.** Comparative figure of the  $^1\text{H}$  (bottom) and  $^1\text{H}\{^{11}\text{B}\}$ (top) NMR (400 MHz) spectra of the hydride resonance of complex **3b** in  $\text{CD}_2\text{Cl}_2$  at  $-30\text{ }^\circ\text{C}$ .

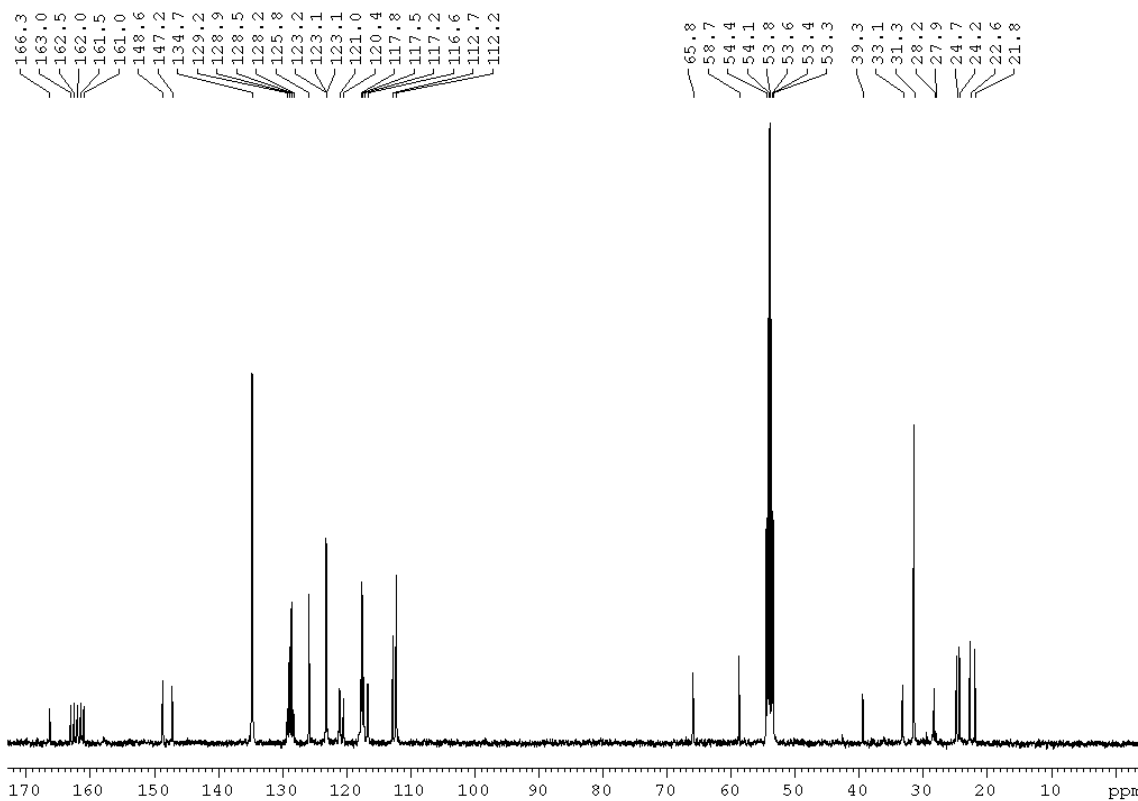

**Figure S16.**  $^{13}\text{C}\{^1\text{H}\}$  NMR (100 MHz) of **3b** in  $\text{CD}_2\text{Cl}_2$  at  $-30\text{ }^\circ\text{C}$ .

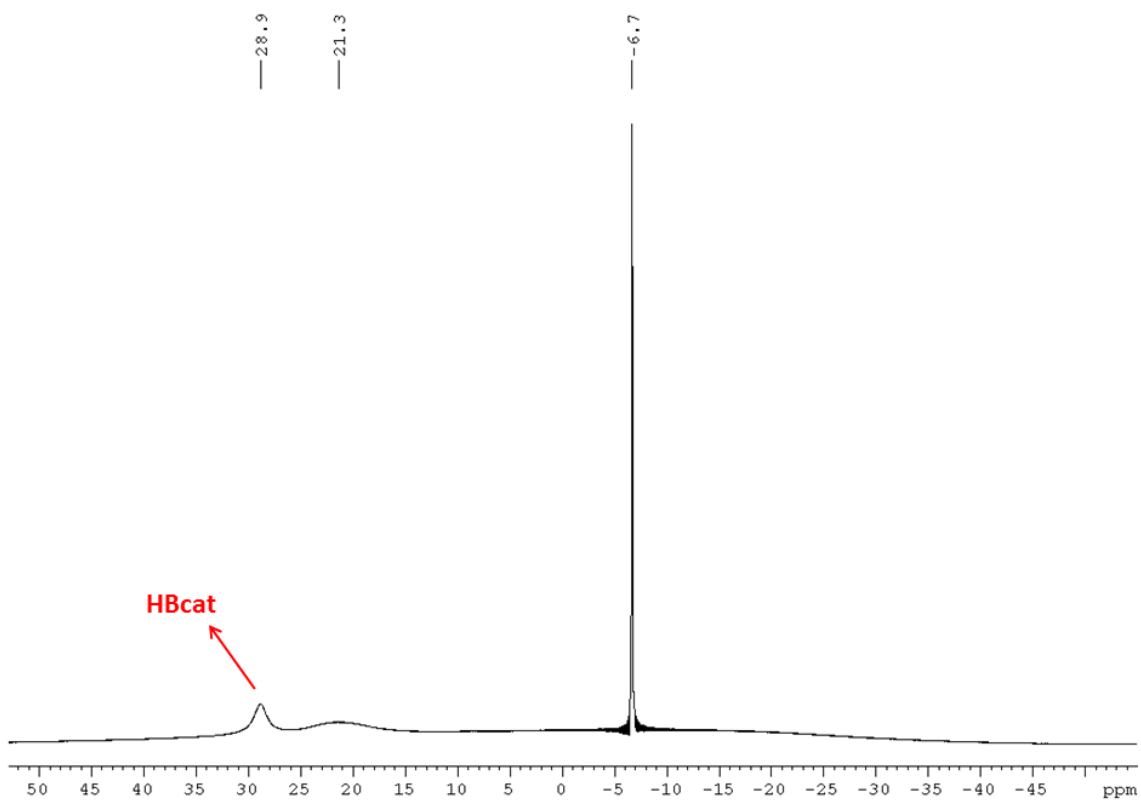

Figure S17.  $^{11}\text{B}\{^1\text{H}\}$  NMR (128 MHz) of **3b** in  $\text{CD}_2\text{Cl}_2$  at  $-30\text{ }^\circ\text{C}$ .

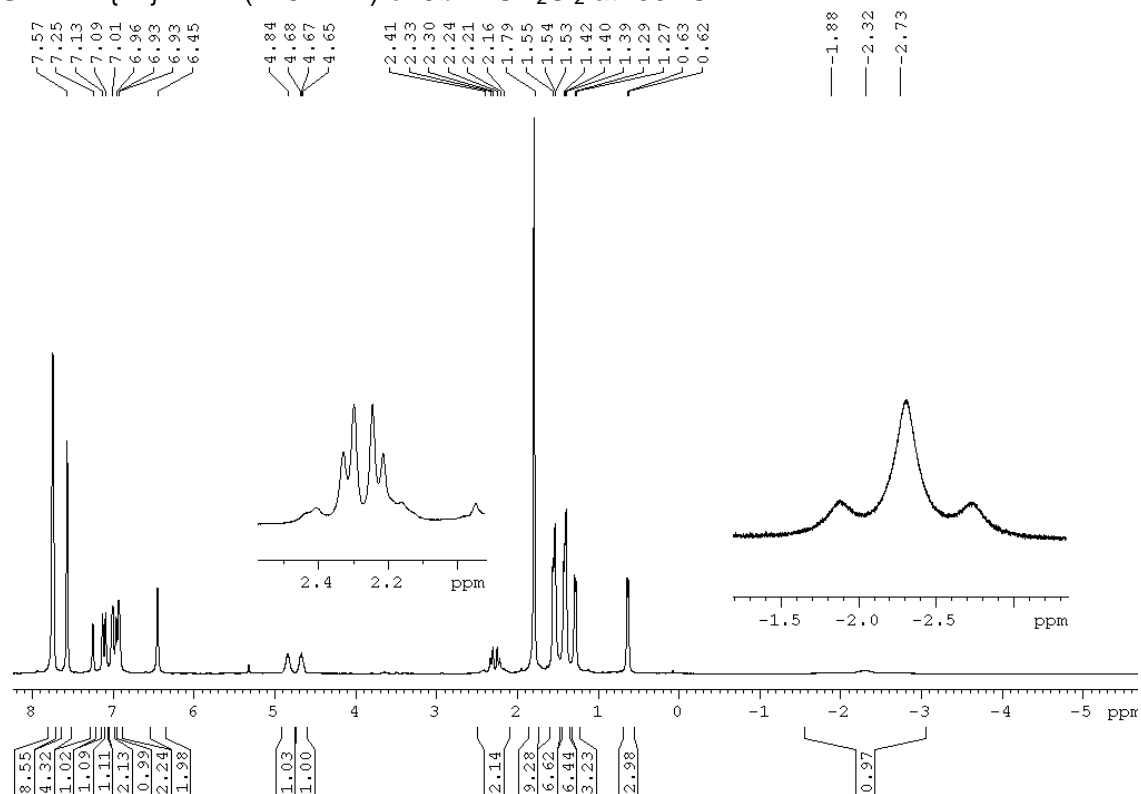

Figure S18.  $^1\text{H}$  NMR (400 MHz) of complex **3c** in  $\text{CD}_2\text{Cl}_2$  at  $-30\text{ }^\circ\text{C}$ .

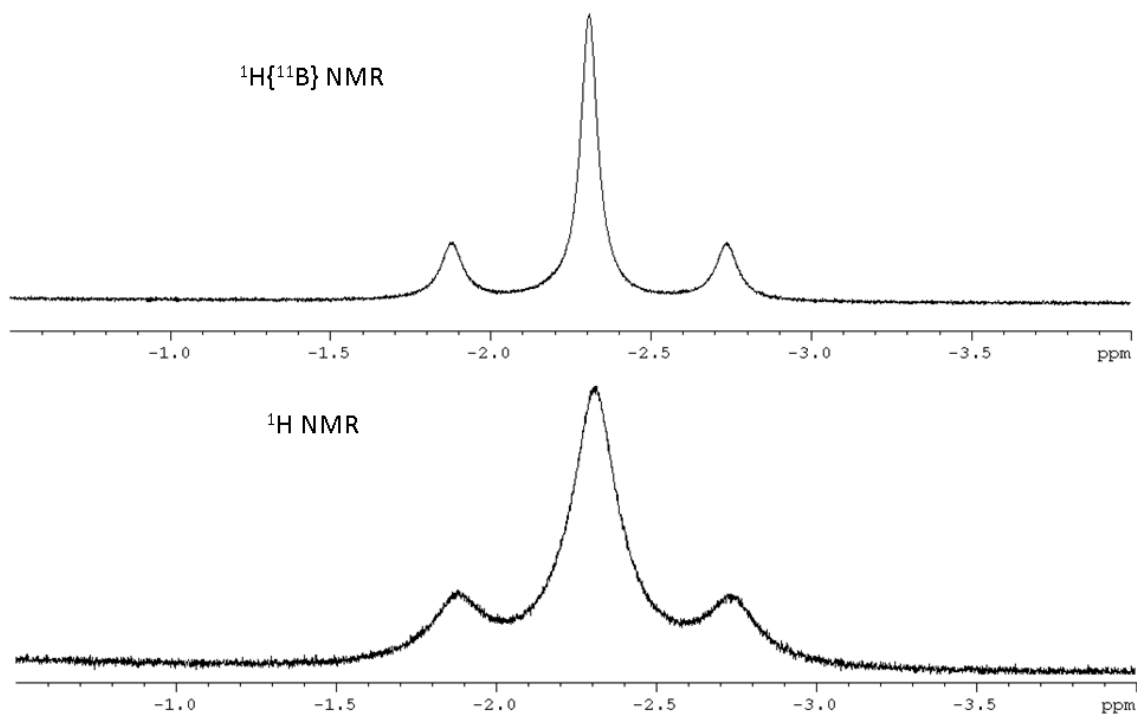

**Figure S19.** Comparative figure of the  $^1\text{H}$  (bottom) and  $^1\text{H}\{^{11}\text{B}\}$ (top) NMR (400 MHz) spectra of the hydride resonance of complex **3c** in  $\text{CD}_2\text{Cl}_2$  at  $-30\text{ }^\circ\text{C}$ .

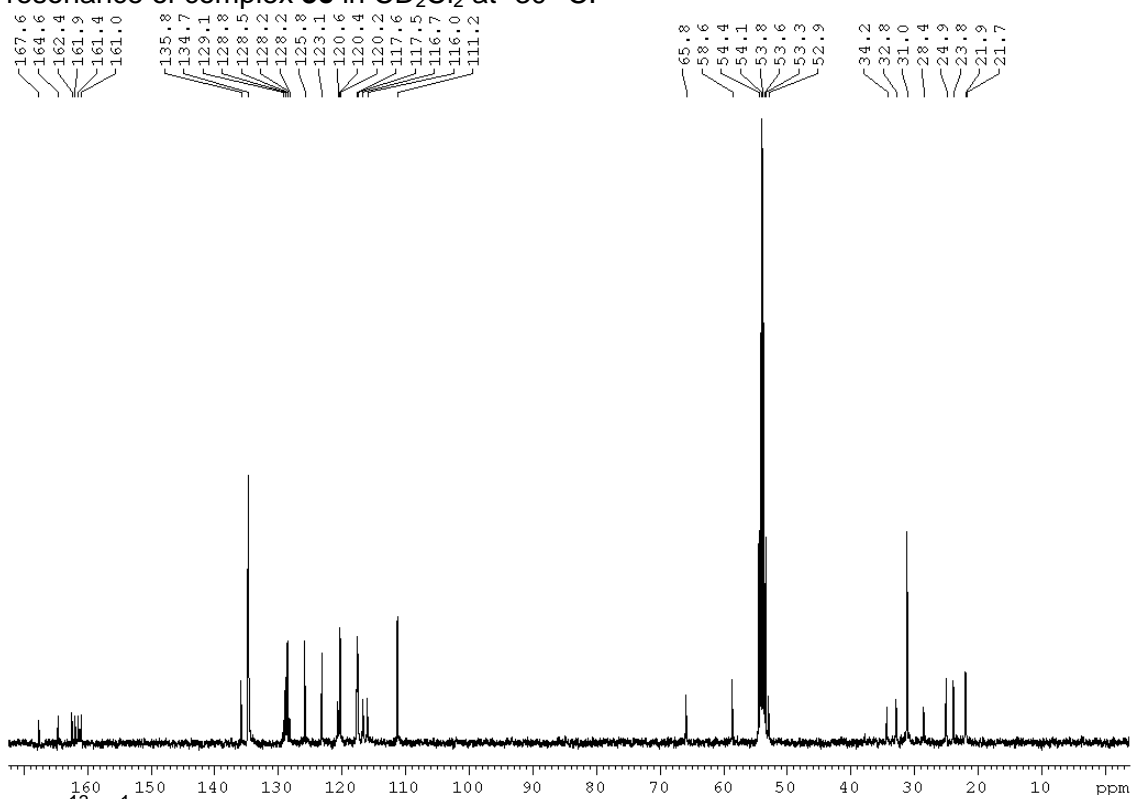

**Figure S20.**  $^{13}\text{C}\{^1\text{H}\}$  NMR (100 MHz) of **3c** in  $\text{CD}_2\text{Cl}_2$  at  $-30\text{ }^\circ\text{C}$ .

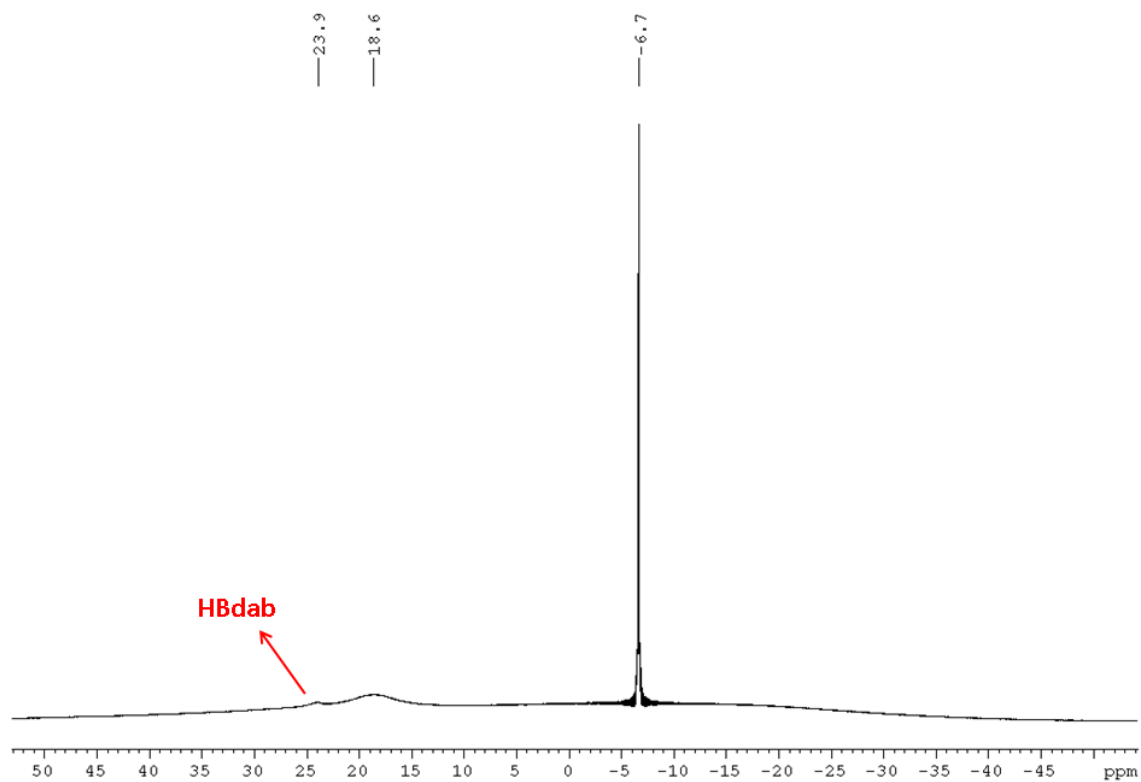

Figure S21.  $^{11}\text{B}\{^1\text{H}\}$  NMR (128 MHz) of **3c** in  $\text{CD}_2\text{Cl}_2$  at  $-30\text{ }^\circ\text{C}$ .

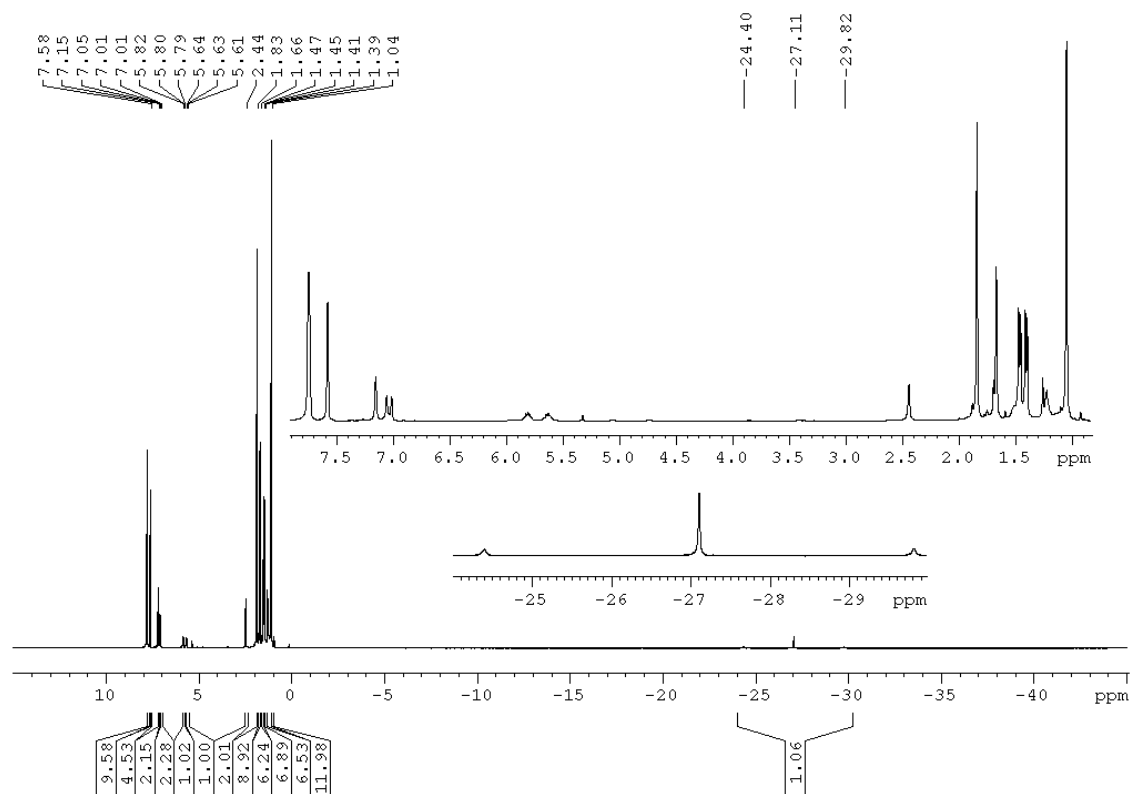

Figure S22.  $^1\text{H}$  NMR (400 MHz) of complex **4a** in  $\text{CD}_2\text{Cl}_2$  at  $-5\text{ }^\circ\text{C}$ .



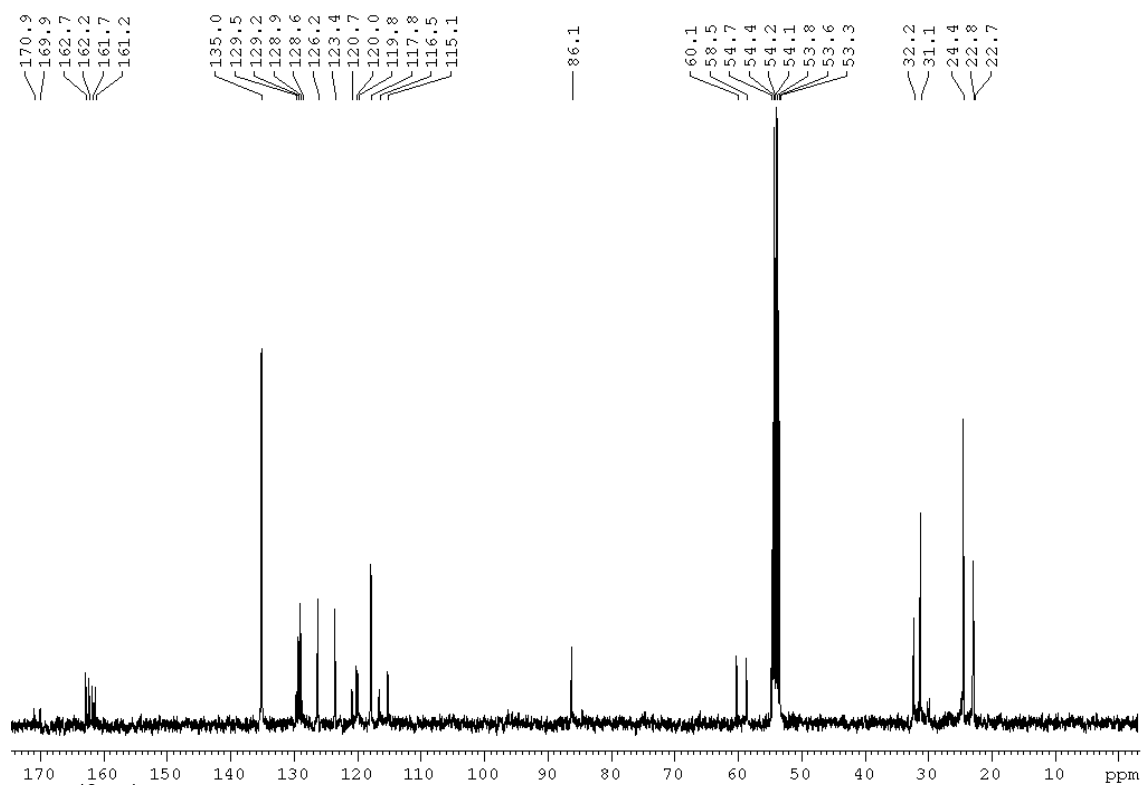

Figure S23.  $^{13}\text{C}\{^1\text{H}\}$  NMR (100 MHz) of **4a** in  $\text{CD}_2\text{Cl}_2$  at  $0\text{ }^\circ\text{C}$ .

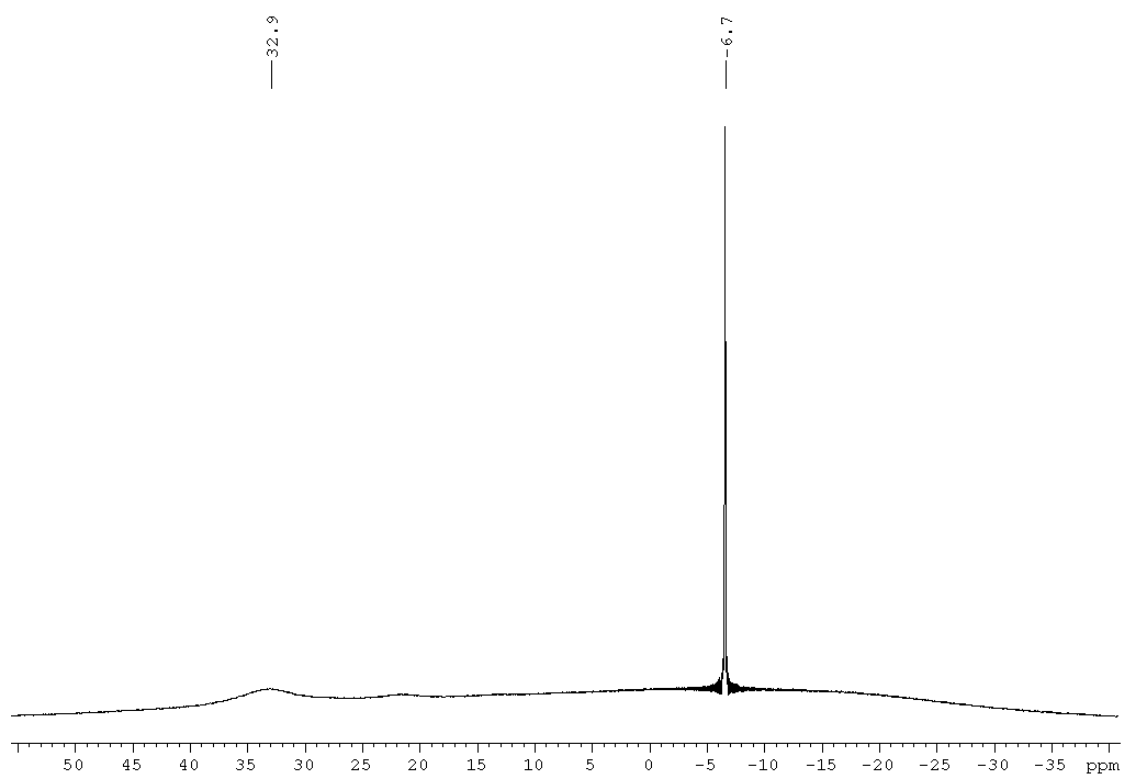

Figure S24.  $^{11}\text{B}\{^1\text{H}\}$  NMR (128 MHz) of **4a** in  $\text{CD}_2\text{Cl}_2$  at  $0\text{ }^\circ\text{C}$ .

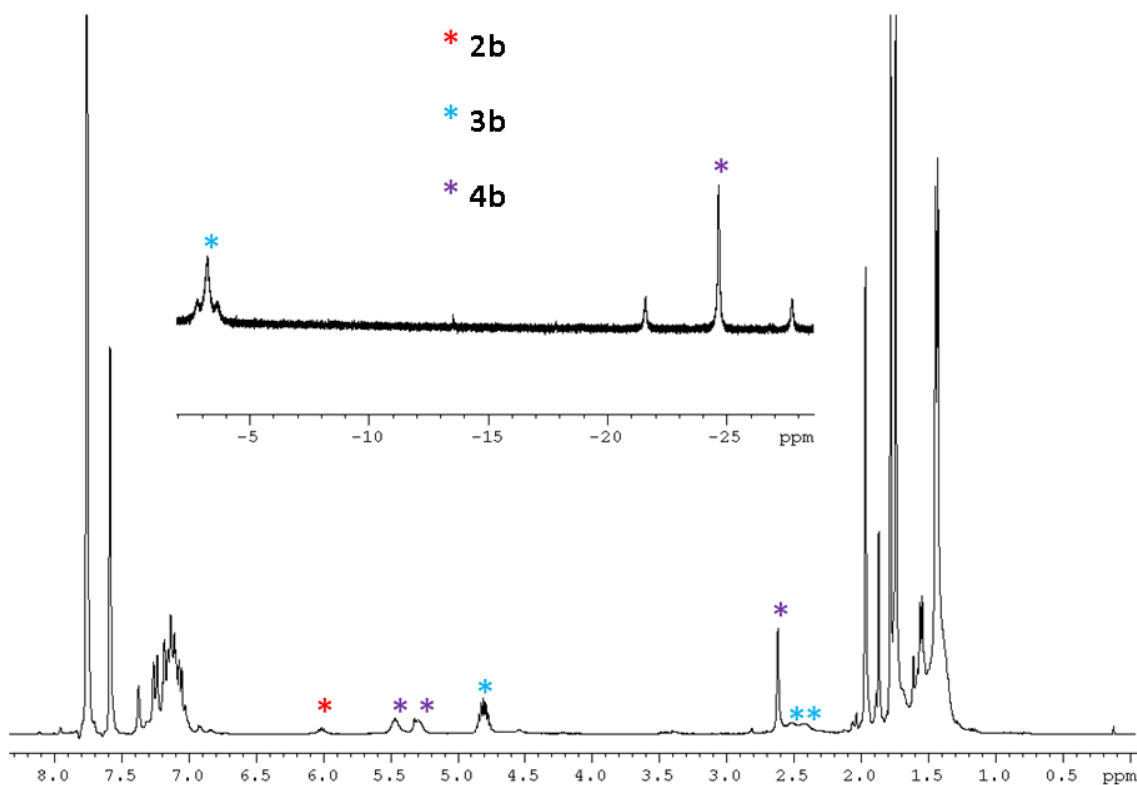

**Figure S25.**  $^1\text{H}\{^{11}\text{B}\}$  NMR (400 MHz) of the reaction mixture of complex **1** with HBcat in  $\text{CD}_2\text{Cl}_2$  at  $5\text{ }^\circ\text{C}$  (hydride region in the inset).

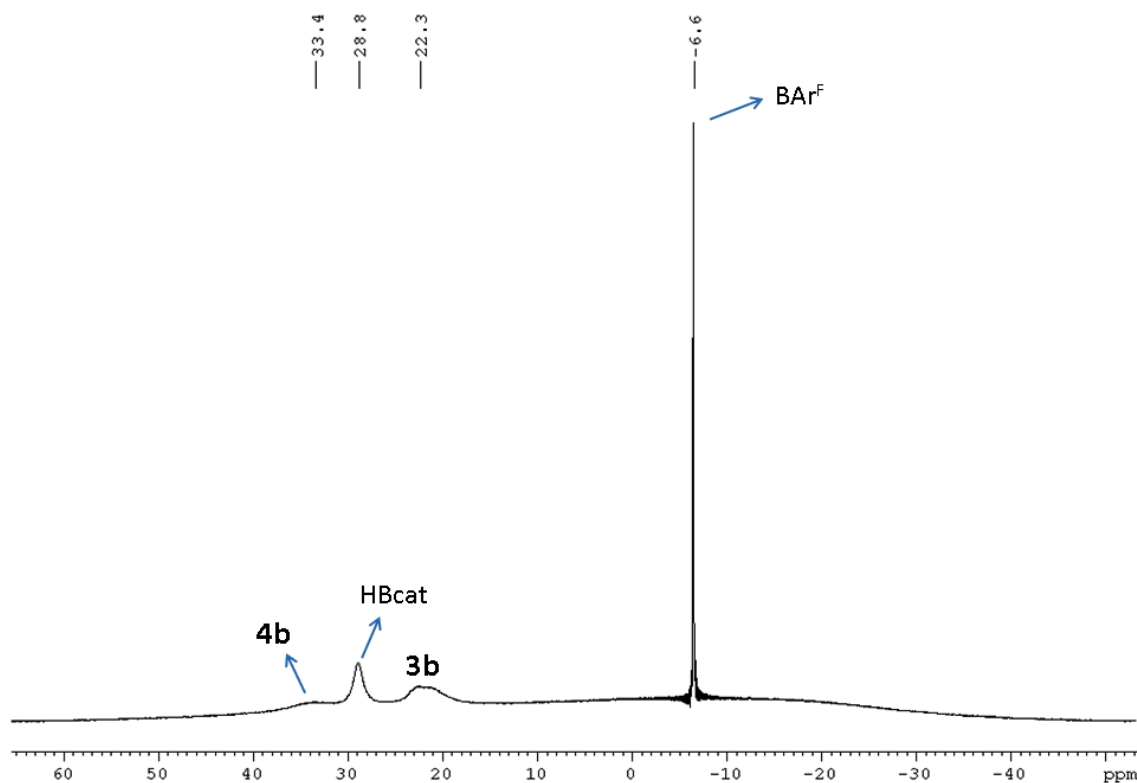

**Figure S26.**  $^{11}\text{B}\{^1\text{H}\}$  NMR (128 MHz) of the reaction mixture of complex **1** with HBcat in  $\text{CD}_2\text{Cl}_2$  at  $5\text{ }^\circ\text{C}$  (the resonance for complex **2a** is not discernible).

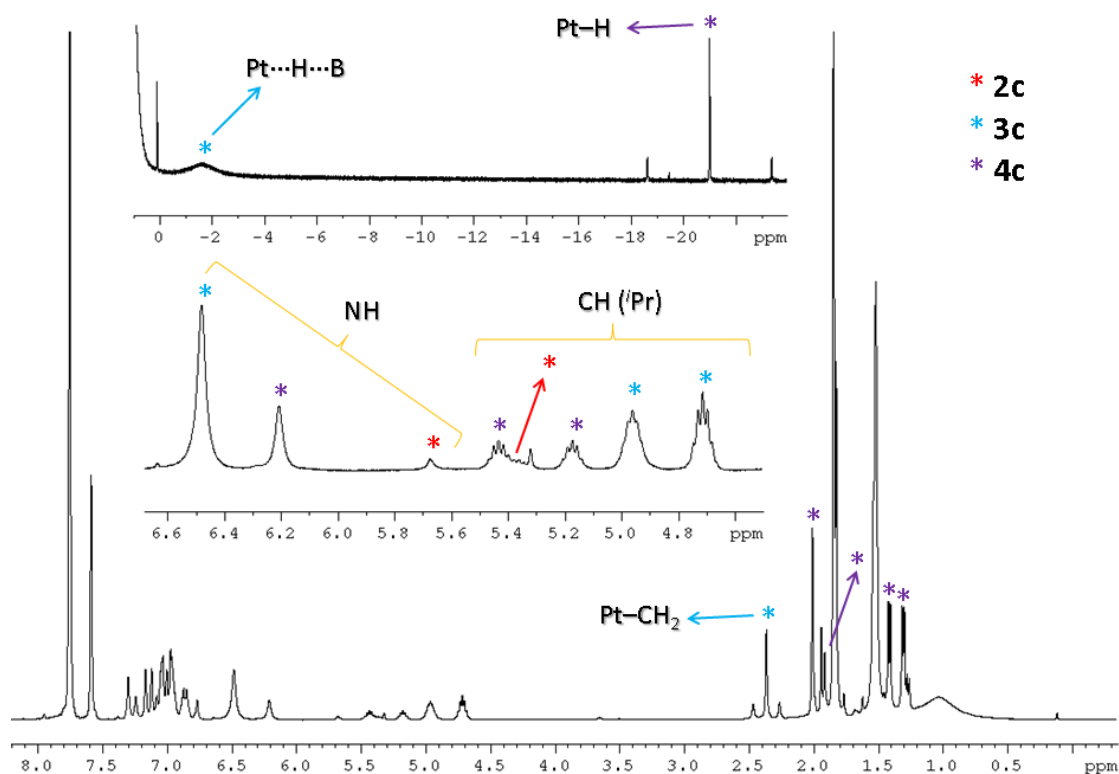

**Figure S27.**  $^1\text{H}\{^{11}\text{B}\}$  NMR (400 MHz) of the reaction mixture of complex **1** with HBdab in  $\text{CD}_2\text{Cl}_2$  at  $20^\circ\text{C}$  (inset (top): hydride region; inset (bottom): NH and  $\text{CH}(\text{CH}_3)_2$  region).

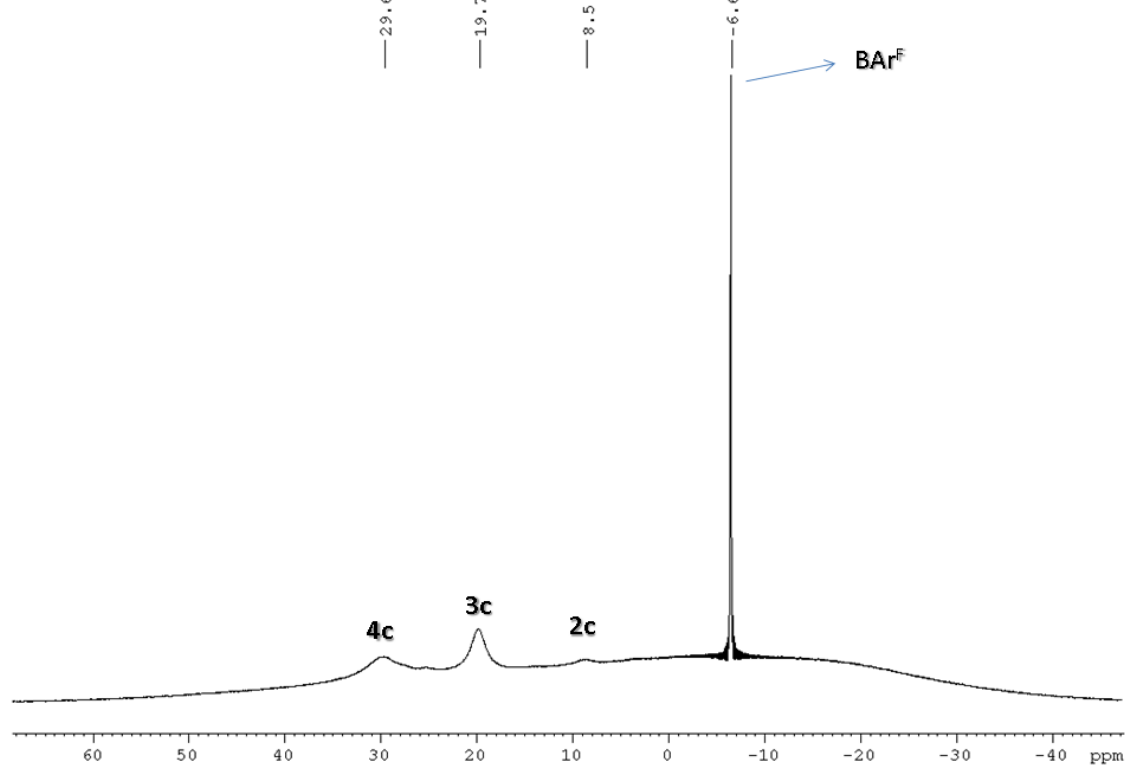

**Figure S28.**  $^{11}\text{B}\{^1\text{H}\}$  NMR (128 MHz) of the reaction mixture of complex **1** with HBdab in  $\text{CD}_2\text{Cl}_2$  at  $25^\circ\text{C}$ .

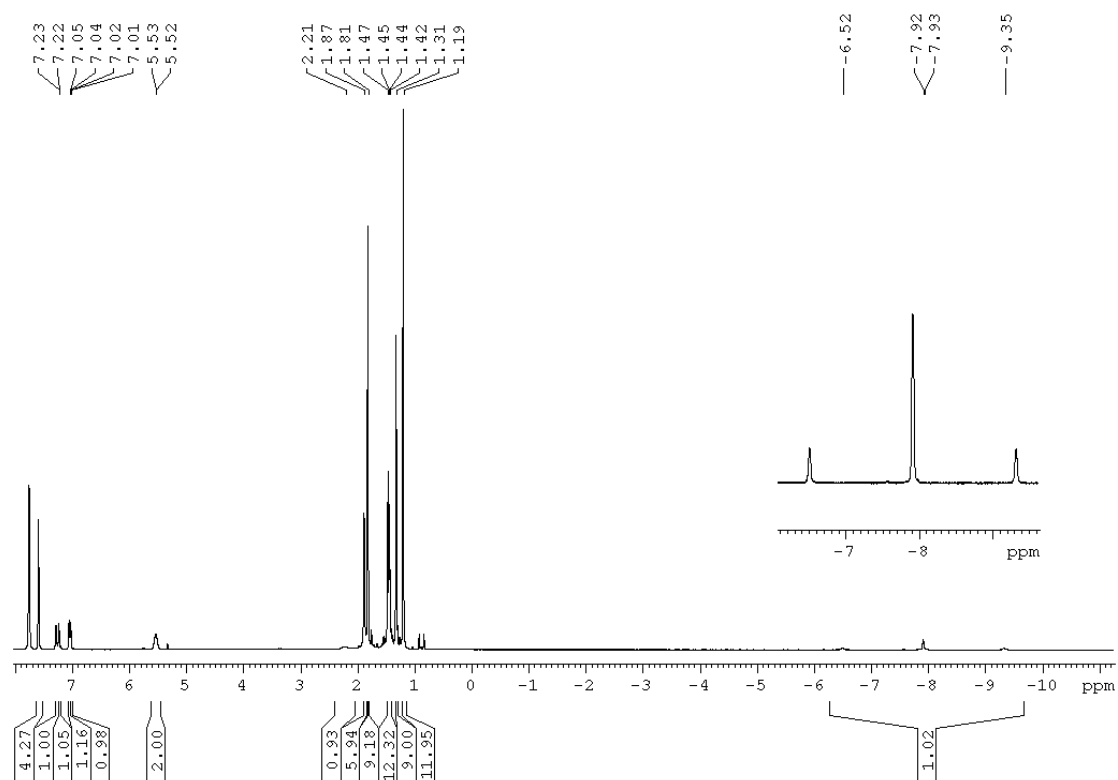

Figure S29.  $^1\text{H}$  NMR (400 MHz) of complex **5** in  $\text{CD}_2\text{Cl}_2$ .

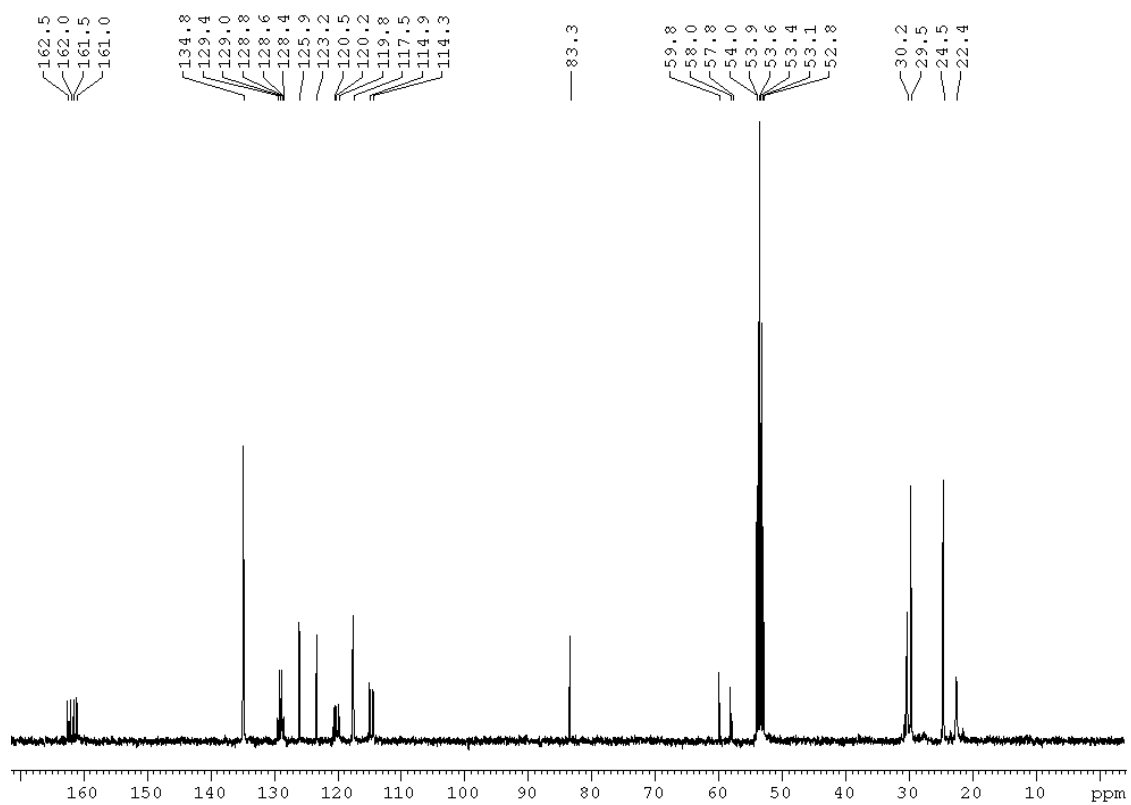

Figure S30.  $^{13}\text{C}\{^1\text{H}\}$  NMR (100 MHz) of **5** in  $\text{CD}_2\text{Cl}_2$ .

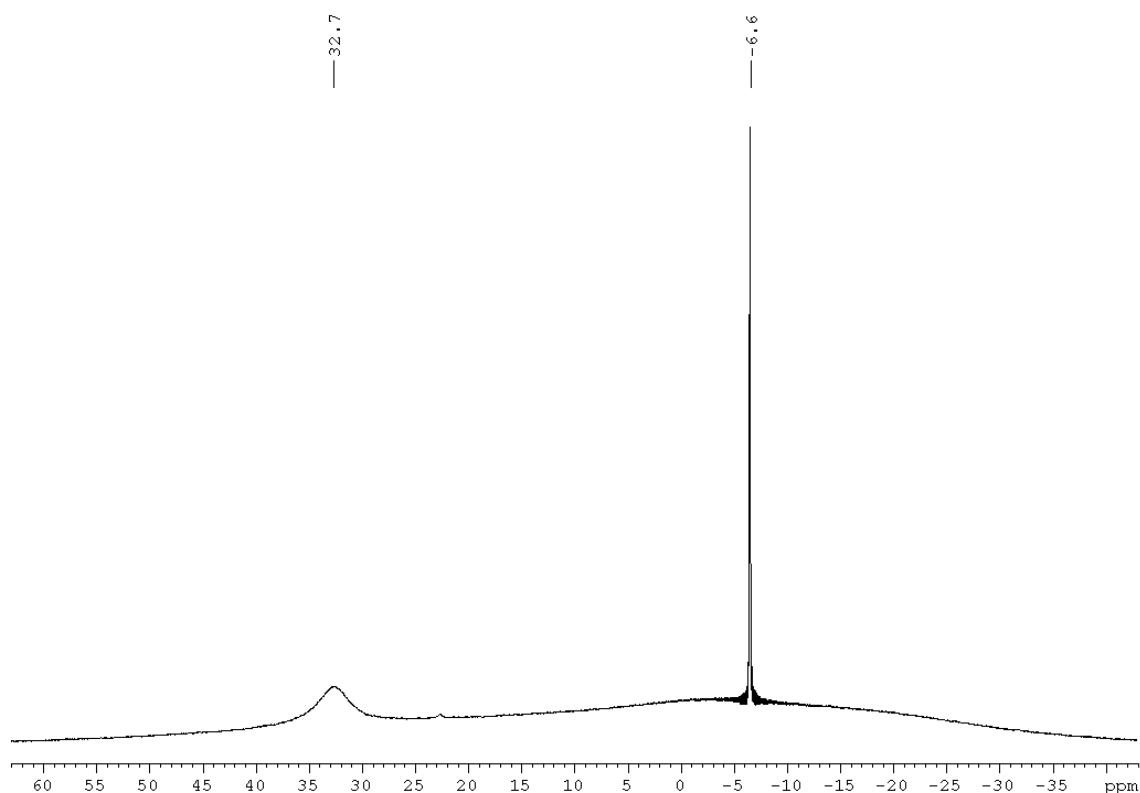

**Figure S31.**  $^{11}\text{B}\{^1\text{H}\}$  NMR (128 MHz) of **5** in  $\text{CD}_2\text{Cl}_2$ .

## 7. Computational details

*Potential Energy Surface Exploration.* Exploration of the potential energy surface of the **1** + HBpin system, with location of intermediates and transition states, was performed using the M06<sup>[4]</sup> functional, as implemented in Gaussian 09<sup>[5]</sup>. Geometry optimizations were performed in solution (solvent = dichloromethane, DCM,  $\epsilon = 8.93$ ) using the continuum SMD model<sup>[6]</sup> and basis sets BS1 (see below). Connections between the transition states and the corresponding minima were checked by displacing in both directions, following the transition vector, the geometry of transition states, with subsequent geometry optimization until a minimum was reached. All energies in solution were corrected by single-point calculations with the larger basis sets BS2 and BS3 (see below). Thermal and entropic corrections were obtained based on vibrational frequencies of the BS1-optimised structures using the quasi-harmonic approximation. Entropic contributions to the Gibbs energies were corrected by employing the approximation described by Grimme where entropic terms for frequencies below a cut-off of  $100\text{ cm}^{-1}$ , were calculated using the free-rotor approximation.<sup>[7]</sup> A correction of  $1.9\text{ kcal mol}^{-1}$  was applied to all Gibbs energies to change the standard state from gas phase (1 bar) to solution (1M). The GoodVibes program developed by Paton and Funes-Ardoiz was employed to introduce these corrections.<sup>[8]</sup> All reported energies in the main text correspond to M06/BS3 Gibbs energies in DCM solvent (1M) at 298.15K in  $\text{kcal mol}^{-1}$ .

*Calculations on complex 3c.* Geometry optimization and frequency analysis was performed using both M06 and B3LYP-D3<sup>[9]</sup> (containing the D3 version of Grimme's dispersion correction)<sup>[10]</sup> functionals and basis set BS1' (see below). Relaxed potential energy surface scan calculations were performed using M06-BS1'. QTAIM<sup>[11]</sup> analyses were carried out on the optimized structure with Multiwfn software<sup>[12]</sup> using different levels of theory that result from combinations of M06 and B3LYP-D3 with BS1' and BS3.

*Basis sets.* As described above, the following basis set were employed:

- *BS1:* double- $\zeta$  6-31G(d,p)<sup>[13]</sup> basis set for the H, C, N, B and O atoms and the scalar relativistic Stuttgart–Dresden SDD pseudopotential and its associated double- $\zeta$  basis set for the Pt atom.<sup>[14]</sup>
- *BS1':* double- $\zeta$  6-31G(d,p) basis set for the H, C, N, B and O atoms and the scalar relativistic Stuttgart–Dresden SDD pseudopotential and its associated double- $\zeta$  basis set, complemented with a set of *f* polarization functions,<sup>[15]</sup> for the Pt atom.
- *BS2:* triple- $\zeta$  6-311G++(d,p)<sup>[13]</sup> basis set for the H, C, N, B and O atoms and the scalar relativistic Stuttgart–Dresden SDD pseudopotential and its associated double- $\zeta$  basis set for the Pt atom.
- *BS3:* triple- $\zeta$  def2TZVP basis set for the H, C, N, B and O atoms and quadruple- $\zeta$  def2QZVP basis set for the Pt atom.<sup>[16]</sup> The scalar relativistic Stuttgart–Dresden SDD pseudopotential and its associated basis set for Pt was used in the energy profile calculations.

*Localized Molecular Orbital Analyses.* A localized orbital analysis was performed to pinpoint bonding interactions and electron rearrangements along the most favorable reaction path.<sup>[17]</sup> Orbital localization of canonical Density Functional Theory molecular orbitals was performed with the CP2K code.<sup>[18]</sup> The PBE exchange-correlation functional was used.<sup>[19]</sup> The Quickstep algorithm was used to solve the electronic structure problem,<sup>[20]</sup> employing a double zeta plus polarization gaussian basis set <sup>[21]</sup> to represent the valence orbitals and plane waves for the electron density (up to a 400 Ry cutoff). Goedecker-Teter-Hutter type pseudopotentials were used for valence-core interactions.<sup>[22]</sup> Models were treated as isolated in a cubic box of 20 Å edge.<sup>[23]</sup>

## 8. Optimized structure of complex 3c

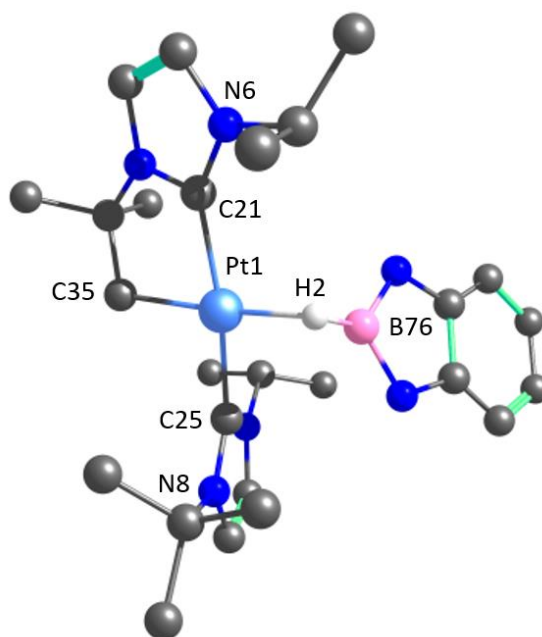

**Figure S32.** Optimized geometry of complex **3c** using M06/BS1'.

| Parameter      | Experimental<br>(Crystal<br>structure) | M06     | B3LYP-D3 |
|----------------|----------------------------------------|---------|----------|
| Pt1-H2         | 1.69(3) Å                              | 1.869 Å | 1.786 Å  |
| Pt1-B76        | 2.313(3) Å                             | 2.443 Å | 2.349 Å  |
| Pt1-H2-B76     | 105(2)°                                | 101.6°  | 99.5°    |
| C21-Pt1-C25    | 168.5(1)°                              | 170.3°  | 169.6°   |
| C35-Pt1-H2     | 169(1)°                                | 170.1°  | 167.9°   |
| C35-Pt1-H2-B76 | -167(4)°                               | -157.5° | -158.3°  |
| N6-C21-C25-N8  | 82.3(4)°                               | 66.8°   | 66.6°    |

**Table S1.** Comparison of experimental (single-crystal X-Ray diffraction) and calculated geometrical parameters of **3c**.

## 9. Optimized structures of $\sigma$ -BH complexes

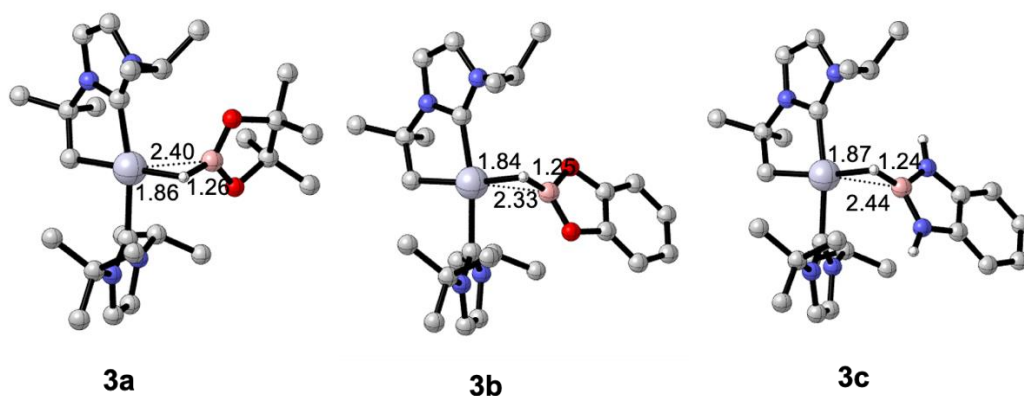

**Figure S33.** M06/BS1 optimized geometries of  $\sigma$ -BH complexes **3a-c**. The optimized values of the Pt-H-B angles are: 98.7° (**3a**), 95.5° (**3b**) and 101.6° (**3c**). Hydrogen atoms of C-H bonds have been omitted for clarity.

#### 10. QTAIM analysis of complex **3c**.

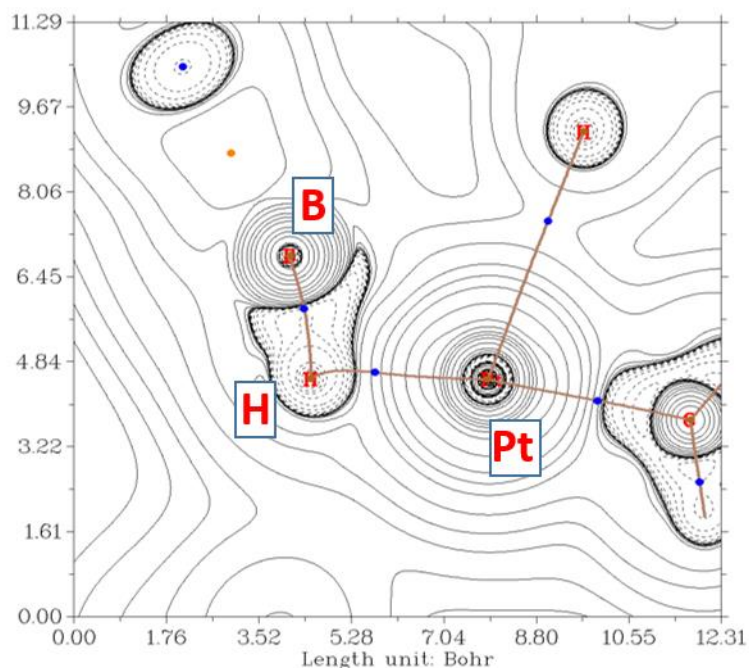

**Figure S34.** Plot of the Laplacian of the electronic density ( $\nabla^2\rho$ ) of complex **3c** using B3LYP-D3/BS1'.

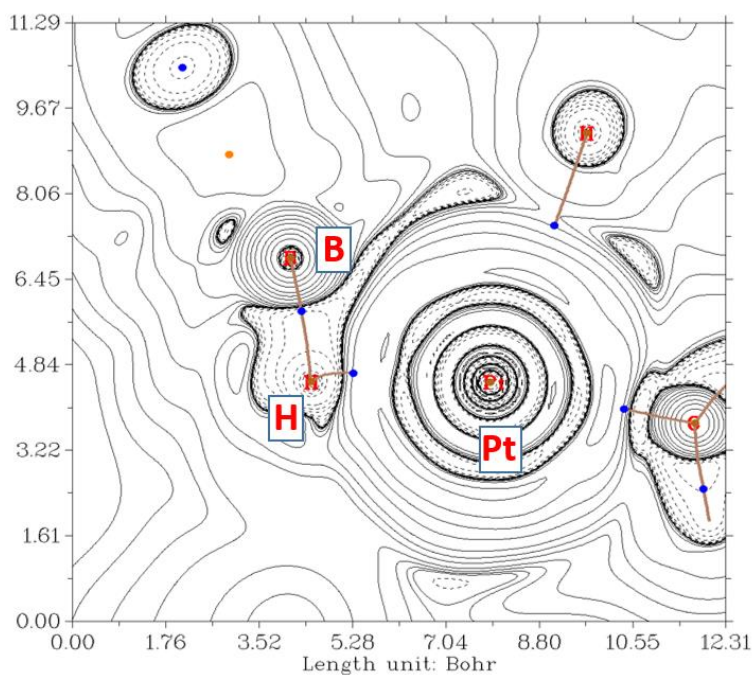

**Figure S35.** Plot of the Laplacian of the electronic density ( $\nabla^2\rho$ ) of complex **3c** using B3LYP-D3/BS3.



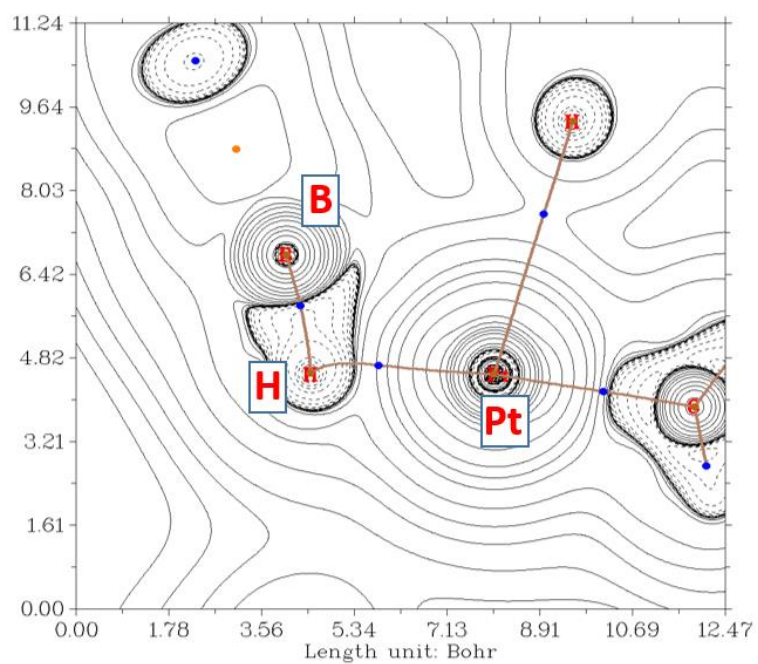

**Figure S36.** Plot of the Laplacian of the electronic density ( $\nabla^2\rho$ ) of complex **3c** using M06/BS1'.

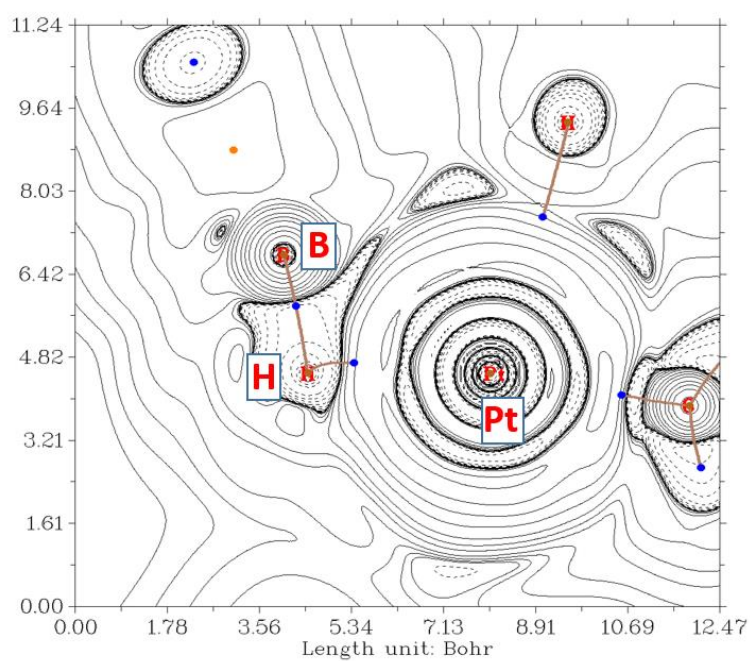

**Figure S37.** Plot of the Laplacian of the electronic density ( $\nabla^2\rho$ ) of complex **3c** using M06/BS3.

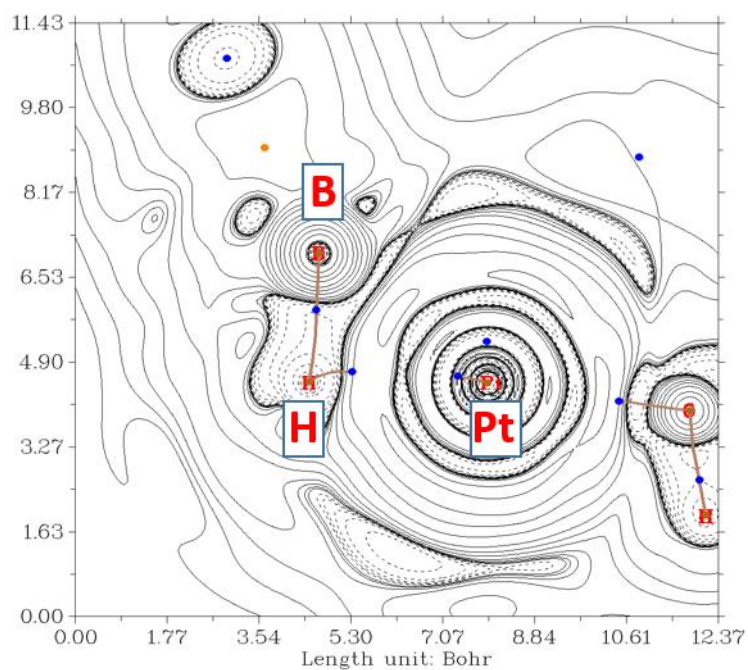

**Figure S38.** Plot of the Laplacian of the electronic density ( $\nabla^2\rho$ ) of complex **3c** (Pt-H-B = 85°) using B3LYP-D3-BS3.

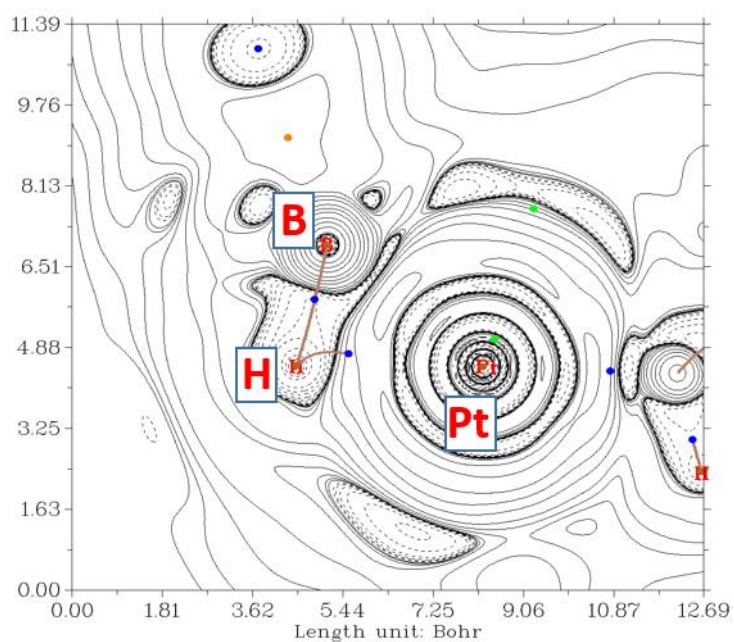

**Figure S39.** Plot of the Laplacian of the electronic density ( $\nabla^2\rho$ ) of complex **3c** (Pt-H-B = 75°) using B3LYP-D3/BS3.

## 11. Relaxed potential energy scan calculations on **3c**

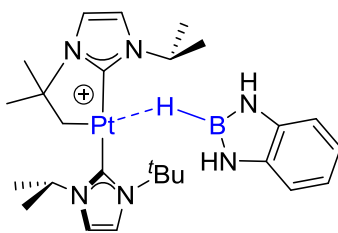

| Pt-H-B Angle       | Energy/Hartrees     | Energy/kcal mol <sup>-1</sup> |
|--------------------|---------------------|-------------------------------|
| 67.8               | Borane dissociation |                               |
| 77.8               | -1487.860763        | 6.1                           |
| 85.7               | -1487.866453        | 2.5                           |
| 95.7               | -1487.870384        | 0.1                           |
| 105.7 <sup>a</sup> | -1487.870457        | 0.0                           |
| 115.7              | -1487.868728        | 1.1                           |
| 125.7              | -1487.866094        | 2.7                           |
| 135.7              | -1487.863436        | 4.4                           |
| 144.4              | -1487.862064        | 5.3                           |
| 154.4              | -1487.860288        | 6.4                           |
| 164.4              | -1487.858551        | 7.5                           |
| 174.4              | -1487.857641        | 8.0                           |

<sup>a</sup> The energy difference between the optimized minimum (Pt-H-B = 101.6°) and this structure is 0.14 kcal mol<sup>-1</sup>.

**Table S4.** Energy values of complex **3c** at fixed values of the Pt-H-B angle using M06/BS1'.

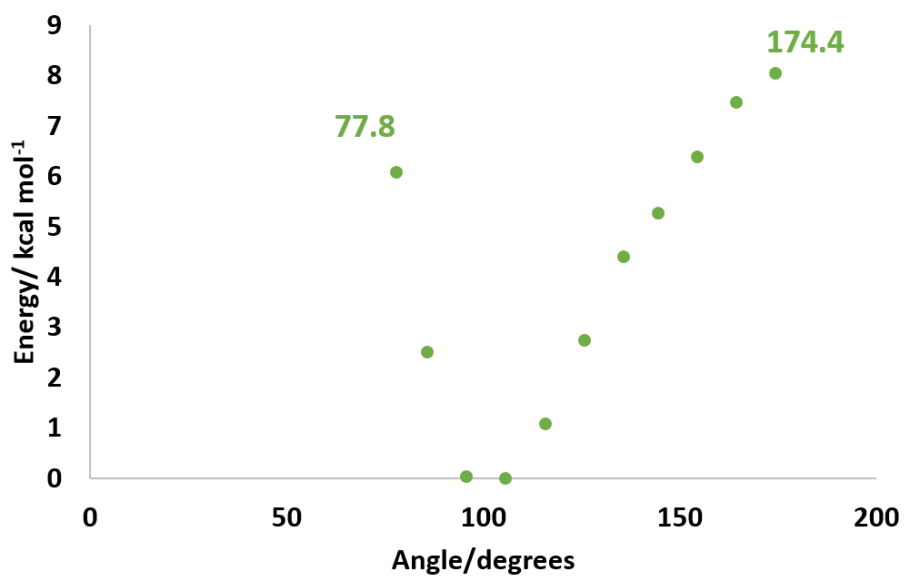

**Figure S40.** Plot of the energy required for the modification of the angle between the Pt, H and B atoms in complex **3c**.

## 12. High energy transition states\*

- *NHC ligands in a cis geometry*

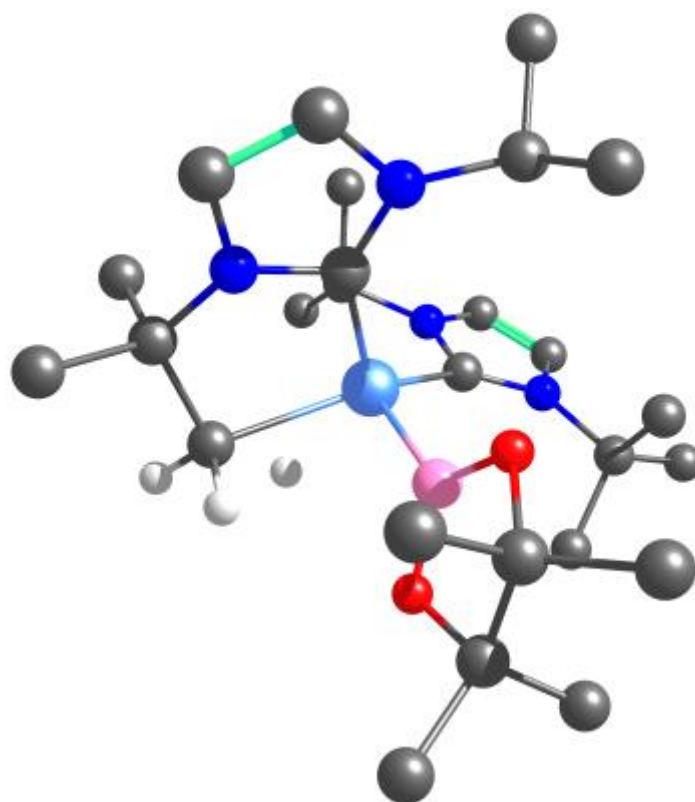

\* Gibbs energies shown were obtained using M06/BS3

**Figure S41.** Transition state connecting **Int1** and **2a**. This transition state is located 52.3 kcal mol<sup>-1</sup> above the reagents. Most of the H atoms have been omitted for clarity.

- *NHC ligands in a trans geometry*

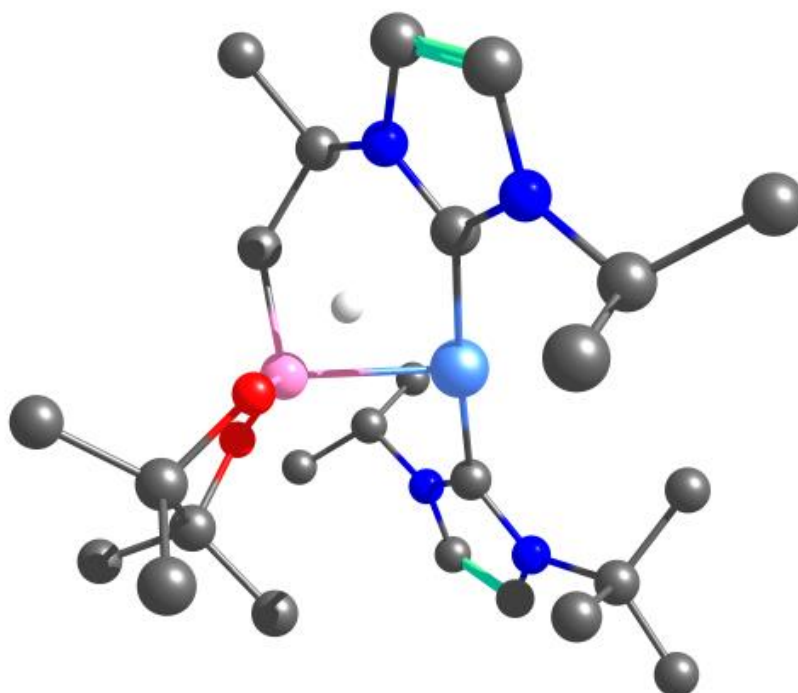

**Figure S42.** Transition state **TS D**, which connects **Int5** (See Figure S48) and **2a**. This transition state is located 39.9 kcal mol<sup>-1</sup> above the reagents. Most of the H atoms have been omitted for clarity.

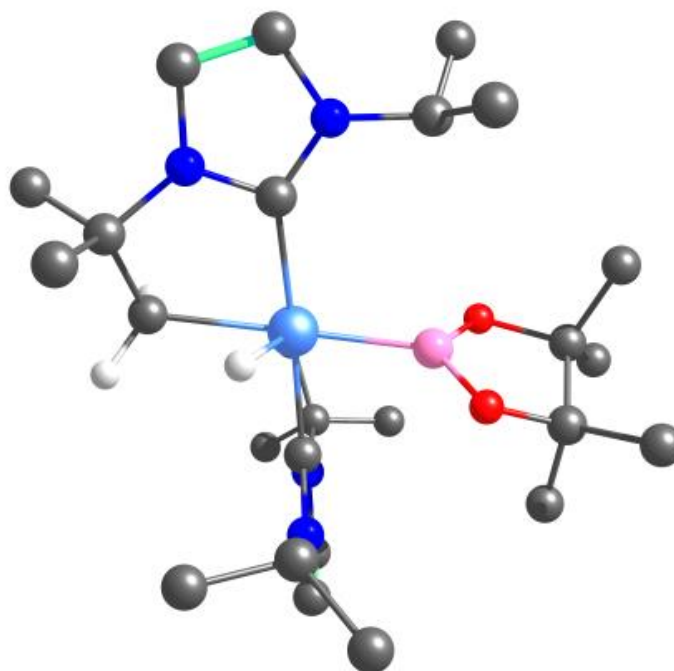

**Figure S43.** Transition state **TS E**, which connects **3a** and **2a**. This transition state is located 34.0 kcal mol<sup>-1</sup> above the reagents. Most of the H atoms have been omitted for clarity.

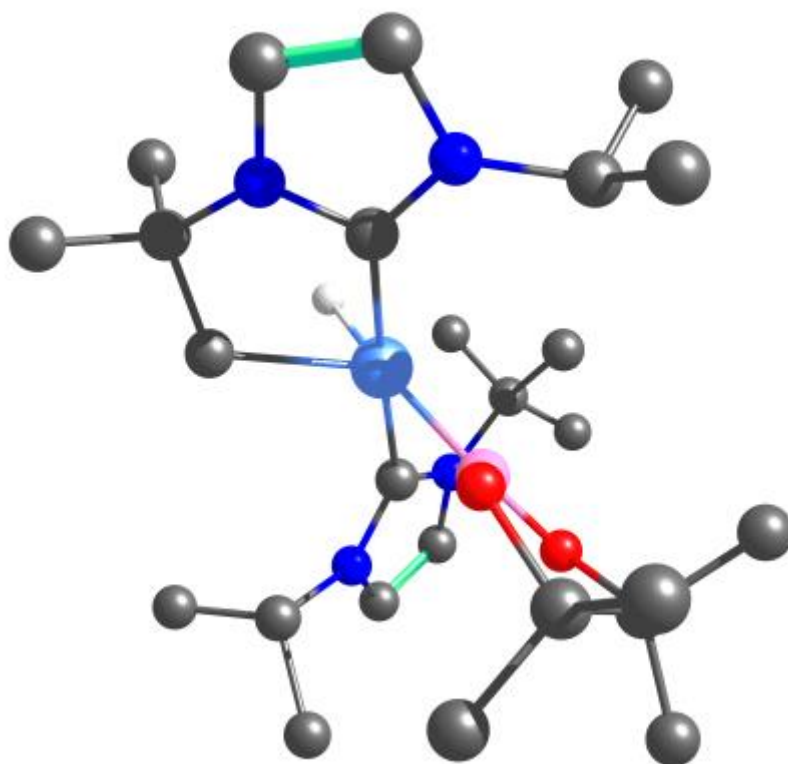

**Figure S44.** Transition state connecting **2a** and the Pt(IV) species  $[\text{Pt}(\text{I}^t\text{Bu}^i\text{Pr})(\text{H})(\text{Bpin})(\text{I}^t\text{Bu}^i\text{Pr})][\text{BAr}^{\text{F}}]$ . This transition state is located  $38.3 \text{ kcal mol}^{-1}$  above the reagents. Most of the H atoms have been omitted for clarity.

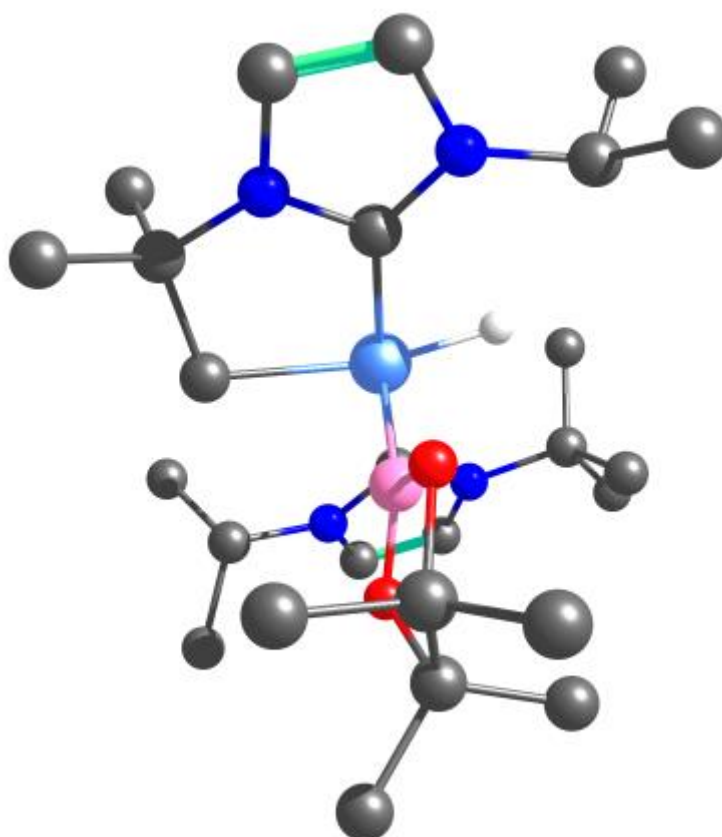

**Figure S45.** Transition state connecting **3a** and a **Int5** (See Figure S48). This transition state is located  $33.5 \text{ kcal mol}^{-1}$  above the reagents. Most of the H atoms have been omitted for clarity.

### 13. Calculated energy profiles

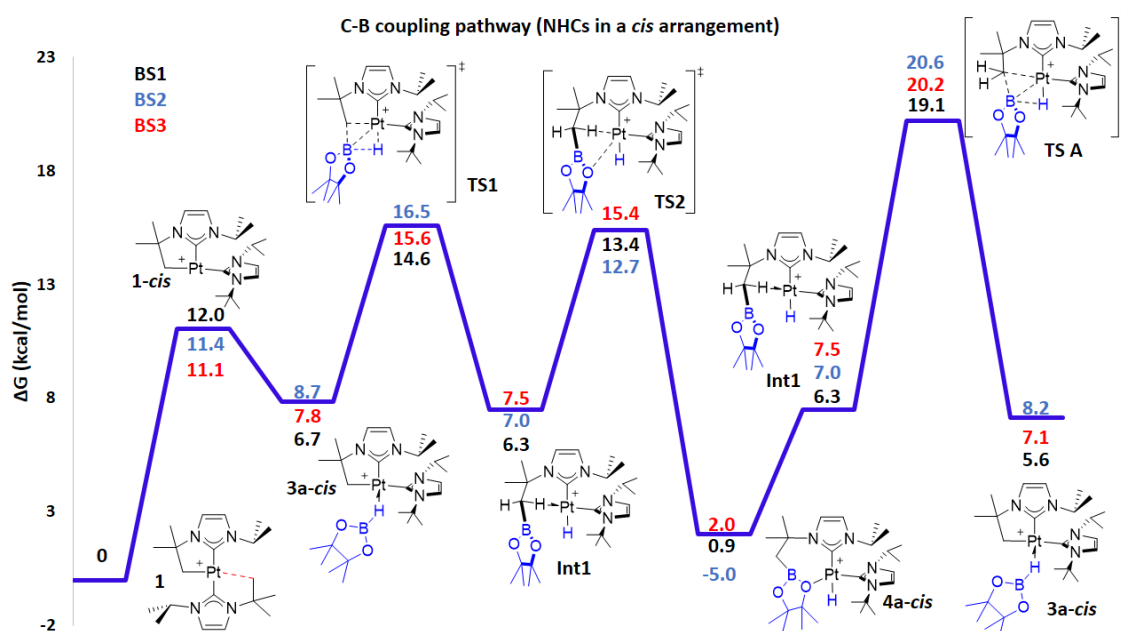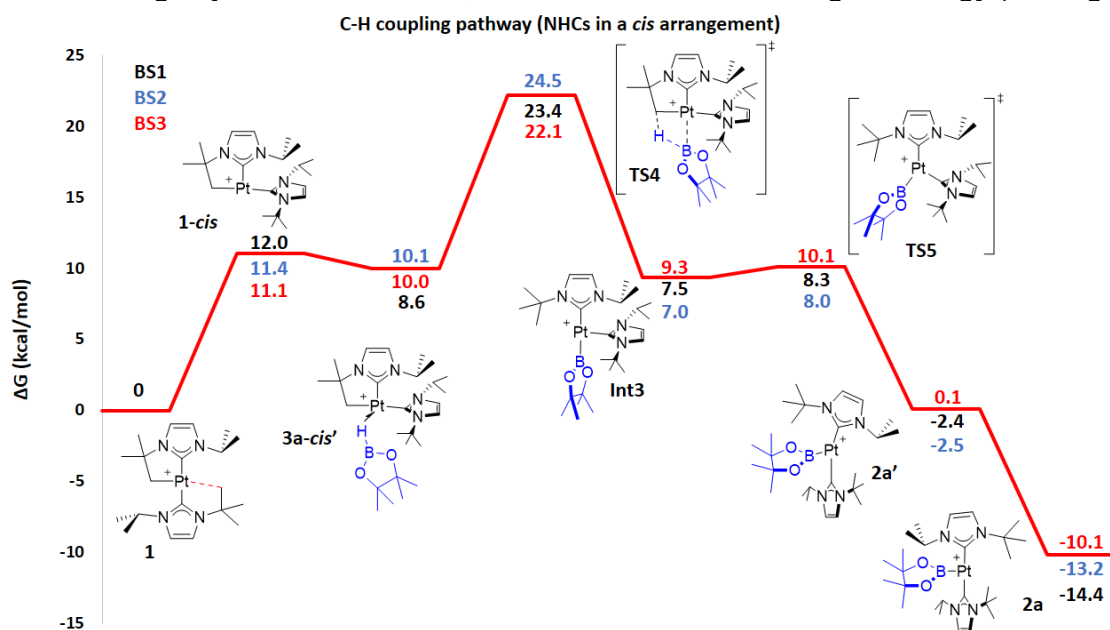

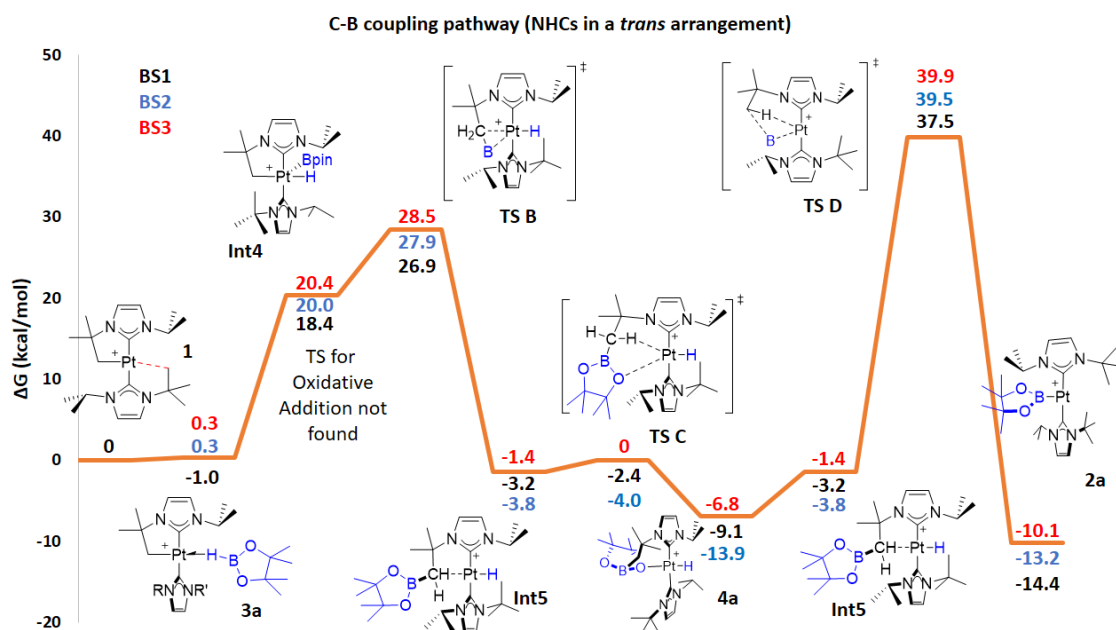

**Figure S48.** Gibbs energy profile for the C–B coupling pathway in which the NHC ligands adopt a *trans* geometry. Given that transition state **TS D** connects **Int5** and **2a**, **TS C** was shown just once for clarity.

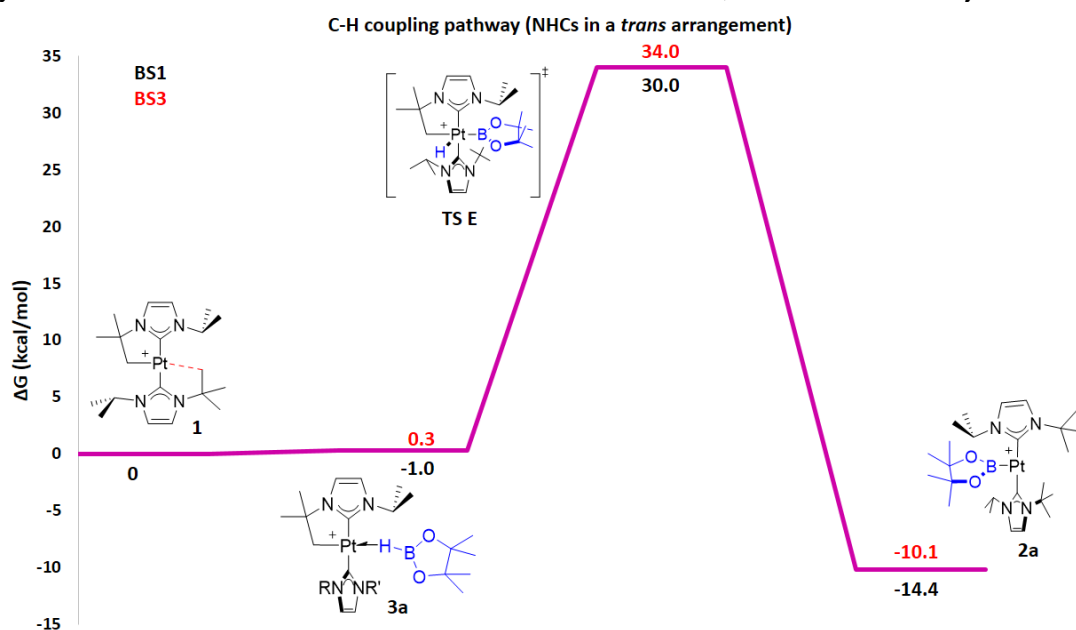

**Figure S49.** Gibbs energy profile for the C–H coupling pathway in which the NHC ligands adopt a *trans* geometry.



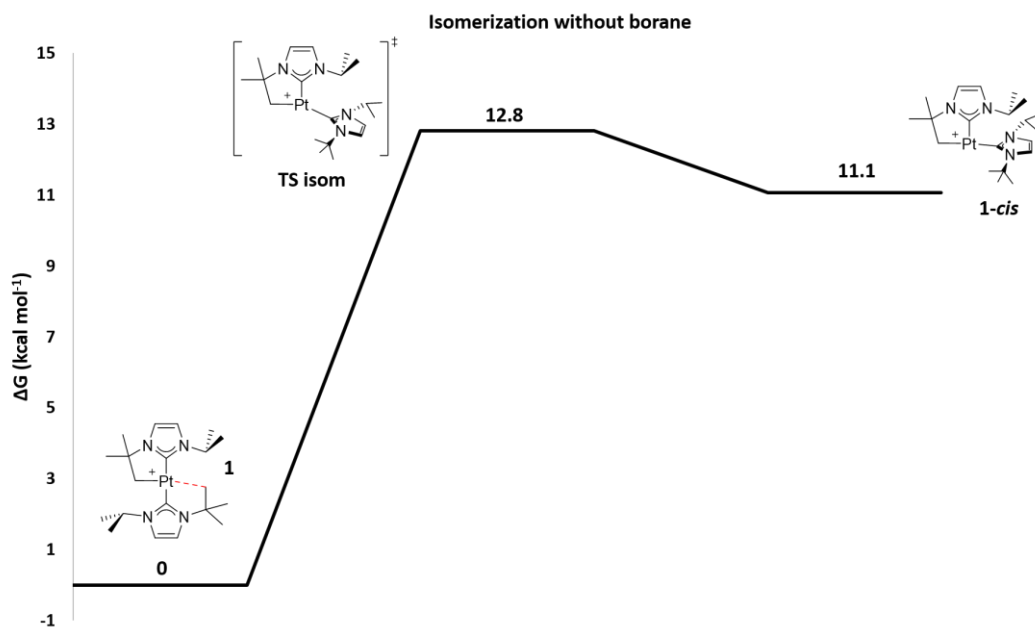

**Figure S50** Gibbs energy profile (BS3) for the *trans-cis* isomerization of **1**.

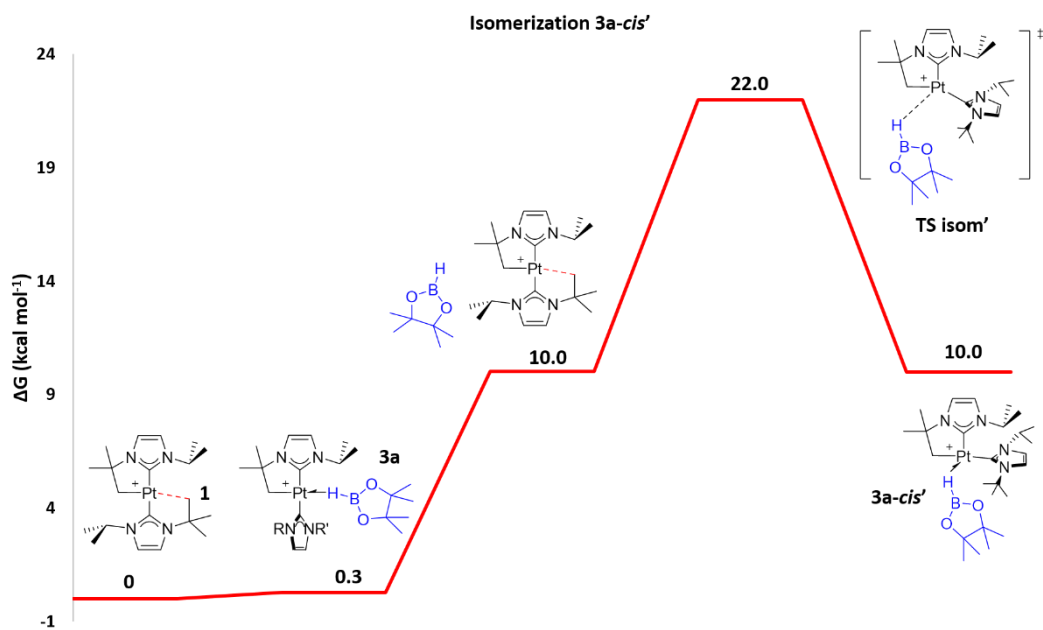

**Figure S51.** Gibbs energy profile (BS3) for the *trans-cis* isomerization of **3a-cis'**.

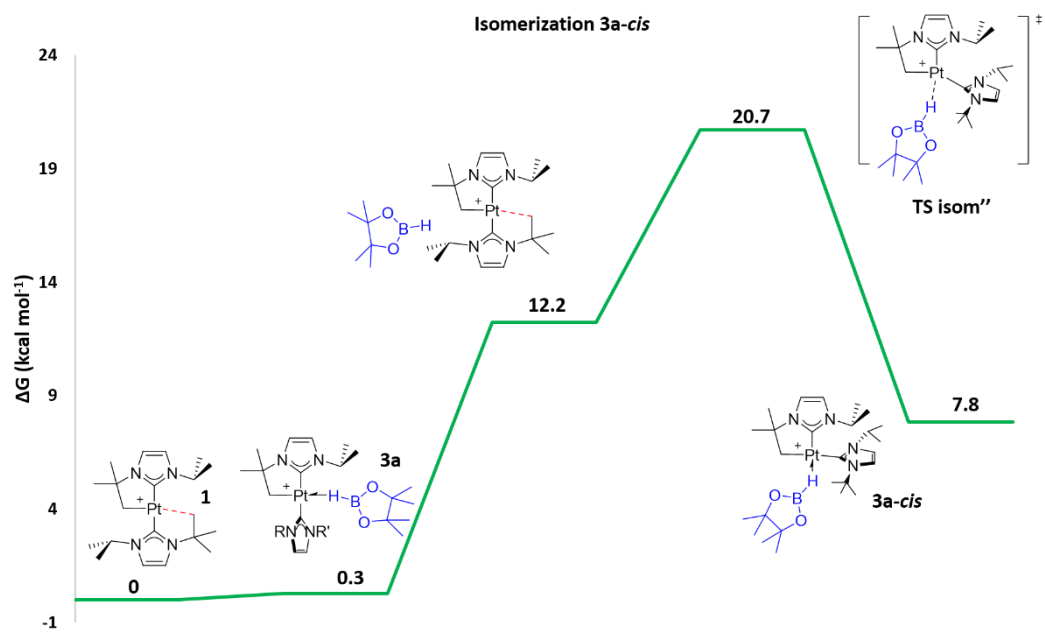

**Figure S52.** Gibbs energy profile (BS3) for the *trans-cis* isomerization of **3a-cis**.

## 14. Cartesian coordinates of the optimized structures

### HBpin

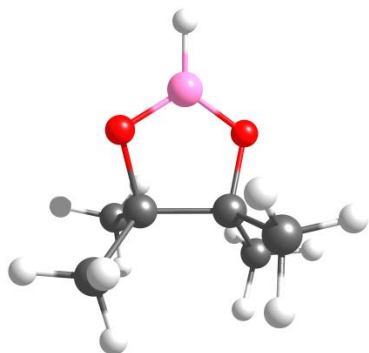

|   |              |              |              |
|---|--------------|--------------|--------------|
| C | 0.777721000  | -0.189378000 | -0.054471000 |
| C | -0.777747000 | -0.189315000 | 0.054489000  |
| O | -1.063268000 | 1.187221000  | 0.420848000  |
| O | 1.063324000  | 1.187096000  | -0.420980000 |
| B | 0.000084000  | 1.926450000  | -0.000057000 |
| H | 0.000160000  | 3.114744000  | -0.000034000 |
| C | -1.474437000 | -0.433491000 | -1.273876000 |
| H | -1.387564000 | -1.479440000 | -1.589449000 |
| H | -2.539323000 | -0.199875000 | -1.162353000 |
| H | -1.069398000 | 0.206380000  | -2.066855000 |
| C | -1.344265000 | -1.105214000 | 1.116939000  |
| H | -2.437848000 | -1.030698000 | 1.122134000  |
| H | -1.080856000 | -2.149110000 | 0.905194000  |
| H | -0.982580000 | -0.849163000 | 2.117549000  |
| C | 1.344185000  | -1.105389000 | -1.116849000 |
| H | 2.437782000  | -1.031085000 | -1.121906000 |
| H | 1.080542000  | -2.149224000 | -0.905106000 |
| H | 0.982678000  | -0.849291000 | -2.117511000 |
| C | 1.474420000  | -0.433435000 | 1.273915000  |
| H | 1.387204000  | -1.479265000 | 1.589792000  |
| H | 2.539379000  | -0.200231000 | 1.162240000  |
| H | 1.069689000  | 0.206803000  | 2.066757000  |

1

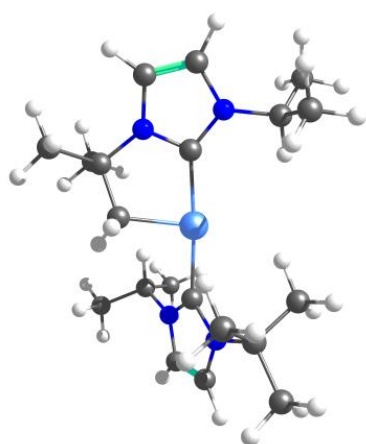

|   |              |              |              |
|---|--------------|--------------|--------------|
| C | 2.108998000  | -0.088593000 | 0.043149000  |
| C | 4.348469000  | 0.005913000  | 0.045725000  |
| H | 5.326336000  | 0.414478000  | 0.259663000  |
| C | 3.992859000  | -1.124060000 | -0.619052000 |
| H | 4.598896000  | -1.889813000 | -1.083204000 |
| C | 1.668810000  | -2.167797000 | -1.123066000 |
| C | 2.135168000  | -2.689694000 | -2.473883000 |
| H | 2.303290000  | -1.867963000 | -3.179590000 |
| H | 1.369103000  | -3.353489000 | -2.891127000 |
| H | 3.061124000  | -3.270588000 | -2.380251000 |
| C | 0.330807000  | -1.430819000 | -1.277858000 |
| H | -0.505406000 | -2.139208000 | -1.229406000 |
| H | 0.290960000  | -0.894343000 | -2.237777000 |
| C | 3.074689000  | 1.928084000  | 1.137851000  |
| H | 2.052503000  | 1.945789000  | 1.542202000  |
| C | 4.065617000  | 2.015592000  | 2.281332000  |
| H | 3.968249000  | 1.165294000  | 2.964991000  |
| H | 3.885928000  | 2.934890000  | 2.848543000  |
| H | 5.099065000  | 2.053768000  | 1.915142000  |
| C | 3.244164000  | 3.052564000  | 0.133002000  |
| H | 4.243810000  | 3.017509000  | -0.318848000 |
| H | 3.129041000  | 4.023252000  | 0.627821000  |
| H | 2.498995000  | 2.982159000  | -0.668994000 |
| C | -1.990148000 | 0.070351000  | 0.112301000  |
| C | -4.133142000 | -0.565113000 | 0.397702000  |
| H | -4.947223000 | -1.218769000 | 0.678760000  |
| C | -4.145134000 | 0.691449000  | -0.105516000 |
| H | -4.981179000 | 1.328225000  | -0.349310000 |
| C | -2.377879000 | 2.402411000  | -0.809678000 |
| C | -1.650309000 | 2.190307000  | -2.131584000 |
| H | -0.735802000 | 1.598905000  | -1.995217000 |
| H | -1.369241000 | 3.162744000  | -2.553066000 |
| H | -2.298735000 | 1.677457000  | -2.852558000 |
| C | -1.477567000 | 3.073683000  | 0.221988000  |
| H | -1.993353000 | 3.175860000  | 1.184276000  |
| H | -1.201766000 | 4.074660000  | -0.130689000 |
| H | -0.540105000 | 2.518328000  | 0.382749000  |
| C | -3.594181000 | 3.287494000  | -1.042655000 |
| H | -4.273151000 | 2.866267000  | -1.793383000 |
| H | -3.246378000 | 4.255017000  | -1.419681000 |
| H | -4.152116000 | 3.470766000  | -0.116575000 |
| C | -2.365873000 | -2.205057000 | 1.118773000  |
| H | -1.278192000 | -2.212127000 | 0.977193000  |
| C | -2.987412000 | -3.377135000 | 0.384688000  |
| H | -4.072584000 | -3.417879000 | 0.542364000  |
| H | -2.564447000 | -4.314072000 | 0.763638000  |
| H | -2.797474000 | -3.323588000 | -0.693510000 |
| C | -2.675096000 | -2.218199000 | 2.604072000  |
| H | -2.200162000 | -1.371776000 | 3.114008000  |
| H | -2.300664000 | -3.144768000 | 3.053314000  |
| H | -3.756539000 | -2.170954000 | 2.784586000  |
| C | 1.574674000  | -3.303381000 | -0.112662000 |
| H | 2.551338000  | -3.784910000 | 0.020945000  |
| H | 0.864871000  | -4.060710000 | -0.468068000 |
| H | 1.233076000  | -2.934887000 | 0.861876000  |
| N | -2.826161000 | 1.075011000  | -0.277044000 |
| N | -2.808677000 | -0.929182000 | 0.524170000  |

|    |             |              |              |
|----|-------------|--------------|--------------|
| N  | 3.176856000 | 0.626750000  | 0.452346000  |
| N  | 2.613458000 | -1.155555000 | -0.615212000 |
| Pt | 0.086724000 | 0.052530000  | 0.109507000  |

**1-cis**

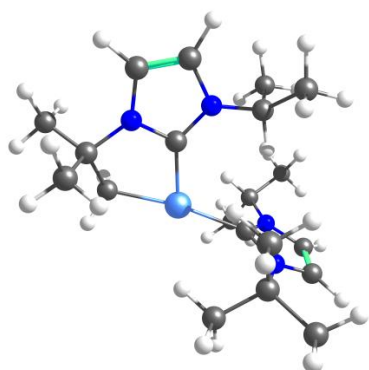

|    |              |              |              |
|----|--------------|--------------|--------------|
| Pt | -0.353878000 | -0.389293000 | -0.818093000 |
| N  | -1.367566000 | 1.396426000  | 1.420141000  |
| N  | -2.885902000 | 0.289904000  | 0.345455000  |
| N  | 2.471195000  | -1.084014000 | 0.480887000  |
| N  | 2.554396000  | 0.739236000  | -0.666846000 |
| C  | -1.556390000 | 0.525811000  | 0.402217000  |
| C  | -2.593323000 | 1.697567000  | 1.994635000  |
| C  | -3.543633000 | 0.995491000  | 1.327301000  |
| C  | 1.695165000  | -0.218890000 | -0.234325000 |
| C  | 3.840925000  | 0.480089000  | -0.248170000 |
| C  | 3.788345000  | -0.663487000 | 0.477063000  |
| H  | -2.679316000 | 2.389022000  | 2.820932000  |
| H  | -4.614892000 | 0.944897000  | 1.464347000  |
| H  | 4.680271000  | 1.113639000  | -0.499052000 |
| H  | 4.582148000  | -1.195511000 | 0.978072000  |
| C  | 2.175744000  | 1.884045000  | -1.516959000 |
| C  | 2.810524000  | 3.162167000  | -1.003371000 |
| H  | 3.894256000  | 3.172433000  | -1.173277000 |
| H  | 2.386341000  | 4.019928000  | -1.536288000 |
| H  | 2.625740000  | 3.298973000  | 0.068888000  |
| C  | 2.536502000  | 1.597990000  | -2.962727000 |
| H  | 2.244326000  | 2.441713000  | -3.597741000 |
| H  | 3.618974000  | 1.451501000  | -3.070621000 |
| H  | 2.026897000  | 0.698497000  | -3.328233000 |
| C  | -0.091720000 | 2.020816000  | 1.821055000  |
| C  | -3.369418000 | -0.693893000 | -0.646531000 |
| C  | -2.228254000 | -0.742258000 | -1.668096000 |
| H  | -2.390419000 | 0.022895000  | -2.443547000 |
| H  | -2.197870000 | -1.726933000 | -2.159690000 |
| C  | 0.104339000  | 1.909812000  | 3.320707000  |
| H  | -0.601677000 | 2.546162000  | 3.868787000  |
| H  | -0.019070000 | 0.876182000  | 3.664416000  |
| H  | 1.115300000  | 2.241536000  | 3.580316000  |
| C  | -0.055215000 | 3.456570000  | 1.329953000  |
| H  | -0.192574000 | 3.508436000  | 0.242680000  |
| H  | -0.846741000 | 4.050002000  | 1.805583000  |
| H  | 0.906262000  | 3.918071000  | 1.582489000  |
| C  | -4.679915000 | -0.214091000 | -1.248291000 |
| H  | -5.496210000 | -0.211923000 | -0.514671000 |

|   |              |              |              |
|---|--------------|--------------|--------------|
| H | -4.576965000 | 0.795354000  | -1.664342000 |
| H | -4.966709000 | -0.890572000 | -2.061817000 |
| C | -3.558691000 | -2.032033000 | 0.056191000  |
| H | -3.941332000 | -2.772717000 | -0.656047000 |
| H | -2.607816000 | -2.401038000 | 0.462636000  |
| H | -4.281272000 | -1.945567000 | 0.877717000  |
| C | 1.962086000  | -2.296709000 | 1.203333000  |
| C | 3.124890000  | -3.006927000 | 1.880530000  |
| H | 3.873919000  | -3.351142000 | 1.157637000  |
| H | 3.612571000  | -2.374768000 | 2.631821000  |
| H | 2.731095000  | -3.888912000 | 2.396705000  |
| C | 1.324063000  | -3.248150000 | 0.197960000  |
| H | 0.997263000  | -4.157693000 | 0.715836000  |
| H | 0.442866000  | -2.803364000 | -0.286387000 |
| H | 2.044871000  | -3.533844000 | -0.577880000 |
| C | 0.965742000  | -1.849063000 | 2.266476000  |
| H | 1.441835000  | -1.150538000 | 2.967047000  |
| H | 0.622357000  | -2.722108000 | 2.834079000  |
| H | 0.679921000  | 1.432761000  | 1.308147000  |
| H | 0.089487000  | -1.361471000 | 1.822098000  |
| H | 1.083159000  | 1.950920000  | -1.420514000 |

2a

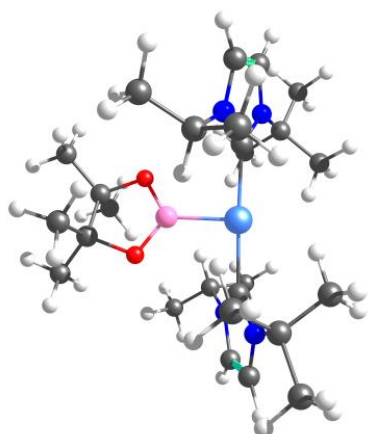

|    |              |              |              |
|----|--------------|--------------|--------------|
| C  | -2.050663000 | -0.769785000 | -0.067455000 |
| C  | -4.129852000 | -0.703345000 | -0.932151000 |
| H  | -4.890425000 | -0.557580000 | -1.686222000 |
| C  | -4.237514000 | -1.101975000 | 0.356617000  |
| H  | -5.117734000 | -1.356741000 | 0.926098000  |
| C  | -1.998606000 | -0.307189000 | 2.988224000  |
| H  | -1.071408000 | 0.006677000  | 2.491841000  |
| H  | -1.769382000 | -0.562977000 | 4.029992000  |
| C  | 2.066870000  | -0.723690000 | 0.212567000  |
| C  | 4.180480000  | -0.410218000 | 0.926634000  |
| H  | 4.969913000  | -0.051342000 | 1.571834000  |
| C  | 4.239196000  | -1.154748000 | -0.201981000 |
| H  | 5.096955000  | -1.558491000 | -0.717256000 |
| N  | -2.786420000 | -0.497814000 | -1.173005000 |
| N  | -2.956373000 | -1.140321000 | 0.881197000  |
| N  | 2.845282000  | -0.150918000 | 1.163568000  |
| N  | 2.937094000  | -1.344575000 | -0.633388000 |
| Pt | 0.006467000  | -0.700784000 | 0.086113000  |
| C  | -2.232783000 | -0.094146000 | -2.478795000 |
| H  | -1.207415000 | 0.233666000  | -2.257881000 |
| C  | -2.185344000 | -1.290047000 | -3.412308000 |

|   |              |              |              |
|---|--------------|--------------|--------------|
| H | -1.736909000 | -1.004198000 | -4.370679000 |
| H | -1.589277000 | -2.104310000 | -2.982260000 |
| H | -3.196461000 | -1.669178000 | -3.609681000 |
| C | -3.013500000 | 1.068881000  | -3.059404000 |
| H | -3.089425000 | 1.897313000  | -2.344483000 |
| H | -2.507645000 | 1.432298000  | -3.960741000 |
| H | -4.028212000 | 0.772087000  | -3.352658000 |
| C | -2.612962000 | -1.515412000 | 2.291367000  |
| C | -3.879858000 | -1.928517000 | 3.026668000  |
| H | -3.605984000 | -2.215428000 | 4.047535000  |
| H | -4.599531000 | -1.104529000 | 3.097121000  |
| H | -4.367361000 | -2.791151000 | 2.556745000  |
| C | -1.650803000 | -2.698392000 | 2.269860000  |
| H | -0.698131000 | -2.444174000 | 1.780729000  |
| H | -1.421868000 | -3.001986000 | 3.298432000  |
| H | -2.094582000 | -3.553852000 | 1.746021000  |
| C | 2.346770000  | 0.578698000  | 2.344985000  |
| H | 1.311711000  | 0.851576000  | 2.097299000  |
| C | 2.345639000  | -0.339193000 | 3.553885000  |
| H | 1.740910000  | -1.235953000 | 3.371100000  |
| H | 3.367078000  | -0.656230000 | 3.801433000  |
| H | 1.933346000  | 0.183390000  | 4.424467000  |
| C | 3.150457000  | 1.842881000  | 2.580792000  |
| H | 2.676469000  | 2.428991000  | 3.376029000  |
| H | 4.173331000  | 1.620661000  | 2.908769000  |
| H | 3.203221000  | 2.463206000  | 1.677653000  |
| C | 2.539153000  | -2.112915000 | -1.856871000 |
| C | 1.605000000  | -3.246119000 | -1.446633000 |
| H | 1.337776000  | -3.839306000 | -2.329488000 |
| H | 2.091298000  | -3.907369000 | -0.719157000 |
| H | 0.667017000  | -2.875494000 | -1.005603000 |
| C | 1.876952000  | -1.162808000 | -2.848850000 |
| H | 0.956866000  | -0.729504000 | -2.436447000 |
| H | 2.558307000  | -0.343056000 | -3.109486000 |
| H | 1.622564000  | -1.709260000 | -3.765298000 |
| C | 3.781201000  | -2.714596000 | -2.499488000 |
| H | 4.483425000  | -1.942763000 | -2.835759000 |
| H | 4.301036000  | -3.403684000 | -1.823399000 |
| H | 3.471912000  | -3.285246000 | -3.381562000 |
| H | -2.698967000 | 0.537330000  | 2.984653000  |
| B | -0.019327000 | 1.283665000  | -0.159159000 |
| O | -1.082956000 | 2.069953000  | 0.206174000  |
| O | 1.024514000  | 2.000341000  | -0.686065000 |
| C | -0.604423000 | 3.441053000  | 0.182453000  |
| C | 0.550671000  | 3.364396000  | -0.858008000 |
| C | -0.129060000 | 3.755059000  | 1.592631000  |
| C | -1.747704000 | 4.353940000  | -0.199319000 |
| C | 1.694412000  | 4.320634000  | -0.606417000 |
| C | 0.071749000  | 3.480748000  | -2.294841000 |
| H | 0.171883000  | 4.803847000  | 1.696029000  |
| H | -0.954550000 | 3.568605000  | 2.289875000  |
| H | 0.716338000  | 3.119190000  | 1.889010000  |
| H | -2.511336000 | 4.337225000  | 0.586978000  |
| H | -1.395219000 | 5.387807000  | -0.302983000 |
| H | -2.219738000 | 4.049503000  | -1.138845000 |
| H | 2.454510000  | 4.205917000  | -1.387887000 |
| H | 1.336451000  | 5.357551000  | -0.635485000 |

|   |              |             |              |
|---|--------------|-------------|--------------|
| H | 2.174067000  | 4.146542000 | 0.362580000  |
| H | -0.238872000 | 4.504209000 | -2.534776000 |
| H | 0.894094000  | 3.207872000 | -2.966345000 |
| H | -0.770205000 | 2.805072000 | -2.493329000 |

**2a'**

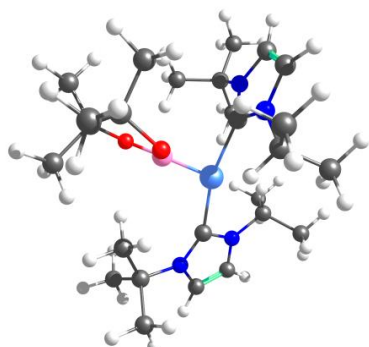

|    |              |              |              |
|----|--------------|--------------|--------------|
| Pt | -0.390815000 | -0.389266000 | 0.036126000  |
| N  | -3.161530000 | -1.220547000 | -0.025116000 |
| N  | -3.458047000 | 0.908773000  | -0.034933000 |
| N  | 2.244384000  | -1.933024000 | -0.640137000 |
| N  | 2.082009000  | -1.373151000 | 1.444832000  |
| C  | -2.480171000 | -0.037635000 | -0.021202000 |
| C  | -4.525161000 | -1.023588000 | -0.048705000 |
| C  | -4.711003000 | 0.312858000  | -0.055652000 |
| C  | 1.460313000  | -1.249604000 | 0.244146000  |
| C  | 3.232283000  | -2.121779000 | 1.324615000  |
| C  | 3.338092000  | -2.467675000 | 0.020678000  |
| H  | -5.234004000 | -1.839913000 | -0.055513000 |
| H  | -5.627039000 | 0.884895000  | -0.068588000 |
| H  | 3.869208000  | -2.353151000 | 2.166595000  |
| H  | 4.100598000  | -3.045902000 | -0.476197000 |
| C  | 1.534091000  | -0.906912000 | 2.736527000  |
| C  | 0.862038000  | -2.068983000 | 3.445134000  |
| H  | 1.589078000  | -2.857626000 | 3.678705000  |
| H  | 0.416907000  | -1.728399000 | 4.386588000  |
| H  | 0.067904000  | -2.503738000 | 2.825300000  |
| C  | 2.609621000  | -0.258231000 | 3.583867000  |
| H  | 2.147756000  | 0.178279000  | 4.476173000  |
| H  | 3.357748000  | -0.983768000 | 3.927099000  |
| H  | 3.117616000  | 0.543946000  | 3.036973000  |
| C  | -2.543086000 | -2.558395000 | 0.021154000  |
| C  | -3.359008000 | 2.402243000  | -0.007849000 |
| C  | -1.916093000 | 2.850684000  | 0.017861000  |
| H  | -1.392866000 | 2.496788000  | 0.914884000  |
| H  | -1.907856000 | 3.946840000  | 0.031357000  |
| C  | -2.820759000 | -3.316113000 | -1.261832000 |
| H  | -3.894963000 | -3.507329000 | -1.376348000 |
| H  | -2.472897000 | -2.755075000 | -2.137236000 |
| H  | -2.309716000 | -4.284913000 | -1.242761000 |
| C  | -2.990694000 | -3.303442000 | 1.263649000  |
| H  | -2.802078000 | -2.712446000 | 2.167177000  |
| H  | -4.061647000 | -3.536976000 | 1.218953000  |
| H  | -2.445431000 | -4.250068000 | 1.344646000  |
| C  | -4.065289000 | 2.901105000  | 1.248447000  |
| H  | -5.134222000 | 2.662035000  | 1.252792000  |
| H  | -3.607465000 | 2.470205000  | 2.147217000  |



|   |              |              |              |
|---|--------------|--------------|--------------|
| H | -3.970509000 | 3.991673000  | 1.304917000  |
| C | -4.026610000 | 2.945760000  | -1.267138000 |
| H | -3.933723000 | 4.037772000  | -1.281522000 |
| H | -3.539579000 | 2.547798000  | -2.165538000 |
| H | -5.094307000 | 2.704758000  | -1.313194000 |
| C | 1.970560000  | -2.130498000 | -2.106241000 |
| C | 3.003759000  | -3.086138000 | -2.687032000 |
| H | 4.021900000  | -2.684428000 | -2.625385000 |
| H | 2.975928000  | -4.069231000 | -2.202169000 |
| H | 2.773507000  | -3.230901000 | -3.747893000 |
| C | 2.074172000  | -0.789330000 | -2.817487000 |
| H | 1.897375000  | -0.934366000 | -3.890028000 |
| H | 1.343088000  | -0.067056000 | -2.441446000 |
| H | 3.079341000  | -0.364329000 | -2.693764000 |
| C | 0.586540000  | -2.745153000 | -2.271995000 |
| H | 0.510776000  | -3.687903000 | -1.714373000 |
| H | 0.407325000  | -2.956996000 | -3.332777000 |
| H | -1.451170000 | -2.392211000 | 0.103267000  |
| H | -0.201991000 | -2.063400000 | -1.926220000 |
| H | 0.785274000  | -0.153451000 | 2.466298000  |
| H | -1.372853000 | 2.519192000  | -0.872301000 |
| B | 0.767026000  | 1.254346000  | -0.056652000 |
| O | 1.502709000  | 1.748367000  | 0.990705000  |
| O | 0.988895000  | 1.922740000  | -1.230854000 |
| C | 2.550945000  | 2.566202000  | 0.397613000  |
| C | 1.899424000  | 3.022274000  | -0.943987000 |
| C | 3.756666000  | 1.661714000  | 0.188186000  |
| C | 2.902685000  | 3.683868000  | 1.352997000  |
| C | 2.858936000  | 3.158427000  | -2.106508000 |
| C | 1.073581000  | 4.289229000  | -0.809738000 |
| H | 4.596139000  | 2.215593000  | -0.247651000 |
| H | 4.085905000  | 1.261270000  | 1.154112000  |
| H | 3.520964000  | 0.813899000  | -0.469905000 |
| H | 3.365076000  | 3.267596000  | 2.255671000  |
| H | 3.626685000  | 4.368385000  | 0.893362000  |
| H | 2.024302000  | 4.259526000  | 1.659562000  |
| H | 2.312819000  | 3.490067000  | -2.997195000 |
| H | 3.626761000  | 3.910133000  | -1.884497000 |
| H | 3.356167000  | 2.213104000  | -2.346599000 |
| H | 1.721803000  | 5.167317000  | -0.706354000 |
| H | 0.467293000  | 4.420542000  | -1.713563000 |
| H | 0.401970000  | 4.254432000  | 0.054441000  |

**3a**

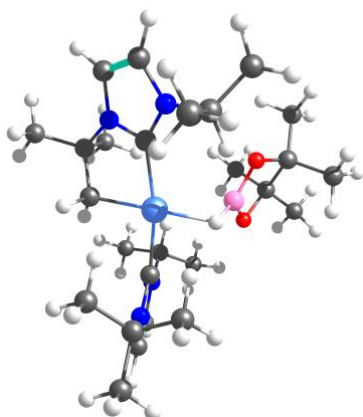

|   |              |              |              |
|---|--------------|--------------|--------------|
| C | 1.341184000  | 1.654140000  | -0.357736000 |
| C | 3.196410000  | 2.899291000  | -0.543110000 |
| H | 4.140301000  | 3.325629000  | -0.232784000 |
| C | 2.481180000  | 3.069820000  | -1.684324000 |
| H | 2.687095000  | 3.660926000  | -2.566012000 |
| C | 0.188558000  | 2.124005000  | -2.450436000 |
| C | -0.100791000 | 3.427024000  | -3.179918000 |
| H | -0.229848000 | 4.256272000  | -2.474208000 |
| H | -1.028453000 | 3.317423000  | -3.753517000 |
| H | 0.698424000  | 3.684901000  | -3.886257000 |
| C | -0.976244000 | 1.731242000  | -1.531178000 |
| H | -1.764579000 | 1.240823000  | -2.117394000 |
| H | -1.408006000 | 2.635421000  | -1.075493000 |
| C | 2.837057000  | 1.688893000  | 1.653343000  |
| H | 2.198507000  | 0.836666000  | 1.906169000  |
| C | 4.286530000  | 1.256457000  | 1.745563000  |
| H | 4.506942000  | 0.472327000  | 1.012935000  |
| H | 4.484551000  | 0.856856000  | 2.746399000  |
| H | 4.973742000  | 2.096456000  | 1.583466000  |
| C | 2.510256000  | 2.860099000  | 2.561348000  |
| H | 3.101399000  | 3.744663000  | 2.291103000  |
| H | 2.741457000  | 2.604314000  | 3.601593000  |
| H | 1.446268000  | 3.122171000  | 2.499843000  |
| C | -2.223306000 | -0.335726000 | 0.206392000  |
| C | -4.048815000 | -1.552572000 | -0.308966000 |
| H | -4.639517000 | -2.273568000 | -0.856705000 |
| C | -4.357694000 | -0.792988000 | 0.765026000  |
| H | -5.279562000 | -0.739234000 | 1.322014000  |
| C | -3.167694000 | 0.944367000  | 2.209985000  |
| C | -2.879835000 | 2.331412000  | 1.650950000  |
| H | -1.882368000 | 2.380859000  | 1.198263000  |
| H | -2.920908000 | 3.064949000  | 2.465134000  |
| H | -3.625472000 | 2.612537000  | 0.896358000  |
| C | -2.088062000 | 0.518634000  | 3.196962000  |
| H | -2.239645000 | -0.518301000 | 3.521169000  |
| H | -2.133603000 | 1.164480000  | 4.081909000  |
| H | -1.083593000 | 0.612849000  | 2.768612000  |
| C | -4.508558000 | 0.971600000  | 2.931407000  |
| H | -5.327053000 | 1.284322000  | 2.272377000  |
| H | -4.440841000 | 1.703787000  | 3.742630000  |
| H | -4.757731000 | 0.001966000  | 3.378481000  |
| C | -2.027958000 | -1.895662000 | -1.762542000 |
| H | -1.004794000 | -1.502706000 | -1.698383000 |
| C | -2.651299000 | -1.489536000 | -3.085580000 |
| H | -3.668868000 | -1.888175000 | -3.187128000 |
| H | -2.054182000 | -1.890409000 | -3.912701000 |
| H | -2.698160000 | -0.399520000 | -3.193192000 |
| C | -2.005077000 | -3.400977000 | -1.573938000 |
| H | -1.549129000 | -3.663383000 | -0.612973000 |
| H | -1.421411000 | -3.866847000 | -2.376986000 |
| H | -3.016775000 | -3.823926000 | -1.618603000 |
| C | 0.519560000  | 1.021067000  | -3.448017000 |
| H | 1.427109000  | 1.267521000  | -4.013771000 |
| H | -0.303223000 | 0.902636000  | -4.163915000 |
| H | 0.675693000  | 0.062938000  | -2.936204000 |
| N | -3.231852000 | -0.044483000 | 1.078718000  |
| N | -2.740379000 | -1.259906000 | -0.638114000 |

|    |              |              |              |
|----|--------------|--------------|--------------|
| N  | 2.482353000  | 2.025452000  | 0.261929000  |
| N  | 1.340788000  | 2.307880000  | -1.541599000 |
| Pt | -0.327267000 | 0.533261000  | 0.028197000  |
| H  | 0.255660000  | -0.500891000 | 1.461382000  |
| B  | 0.960257000  | -1.325373000 | 0.827619000  |
| O  | 0.482720000  | -2.525518000 | 0.398995000  |
| O  | 2.318353000  | -1.253463000 | 0.908687000  |
| C  | 1.643608000  | -3.260596000 | -0.094962000 |
| C  | 2.809036000  | -2.609268000 | 0.707405000  |
| C  | 1.734209000  | -2.994916000 | -1.588266000 |
| C  | 1.438076000  | -4.734120000 | 0.169339000  |
| C  | 4.129318000  | -2.552413000 | -0.026738000 |
| C  | 3.002119000  | -3.206729000 | 2.090475000  |
| H  | 2.556177000  | -3.560706000 | -2.041008000 |
| H  | 0.801640000  | -3.312578000 | -2.068977000 |
| H  | 1.888701000  | -1.929402000 | -1.801541000 |
| H  | 0.610759000  | -5.111587000 | -0.442706000 |
| H  | 2.339675000  | -5.296883000 | -0.102891000 |
| H  | 1.206131000  | -4.933494000 | 1.219754000  |
| H  | 4.899273000  | -2.126084000 | 0.626509000  |
| H  | 4.450999000  | -3.563867000 | -0.304907000 |
| H  | 4.070038000  | -1.942576000 | -0.933602000 |
| H  | 3.464714000  | -4.198682000 | 2.035090000  |
| H  | 3.667969000  | -2.551861000 | 2.664964000  |
| H  | 2.054450000  | -3.292574000 | 2.635399000  |

### 3a-cis

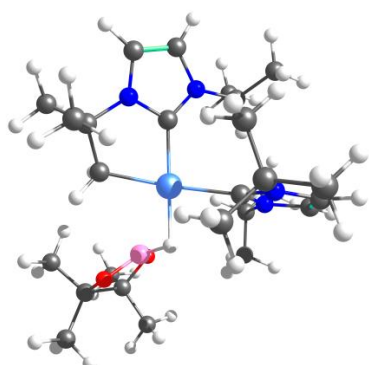

|    |              |              |              |
|----|--------------|--------------|--------------|
| Pt | -0.043530000 | 0.291409000  | 0.166118000  |
| N  | 2.502340000  | 1.297755000  | -1.366563000 |
| N  | 1.179584000  | 2.795315000  | -0.554899000 |
| N  | 2.039882000  | -1.730241000 | 1.470516000  |
| N  | 1.204483000  | -2.526850000 | -0.353293000 |
| C  | 1.336341000  | 1.462177000  | -0.700227000 |
| C  | 3.078218000  | 2.534125000  | -1.610245000 |
| C  | 2.249173000  | 3.475409000  | -1.091672000 |
| C  | 1.161529000  | -1.449046000 | 0.465788000  |
| C  | 2.098644000  | -3.470242000 | 0.113199000  |
| C  | 2.624714000  | -2.970140000 | 1.254145000  |
| H  | 4.013452000  | 2.634207000  | -2.143696000 |
| H  | 2.325043000  | 4.553640000  | -1.073729000 |
| H  | 2.277320000  | -4.409045000 | -0.392401000 |
| H  | 3.354483000  | -3.403303000 | 1.920166000  |
| C  | 0.346058000  | -2.708780000 | -1.540207000 |
| C  | 1.151017000  | -3.237342000 | -2.712335000 |
| H  | 1.442086000  | -4.284217000 | -2.559106000 |

|   |              |              |              |
|---|--------------|--------------|--------------|
| H | 0.542339000  | -3.196819000 | -3.621886000 |
| H | 2.061351000  | -2.649811000 | -2.880899000 |
| C | -0.817170000 | -3.617981000 | -1.189867000 |
| H | -1.492630000 | -3.710669000 | -2.048045000 |
| H | -0.455979000 | -4.621330000 | -0.928586000 |
| H | -1.388945000 | -3.218245000 | -0.344979000 |
| C | 3.017425000  | 0.031446000  | -1.919511000 |
| C | -0.034807000 | 3.298501000  | 0.127331000  |
| C | -1.049858000 | 2.154139000  | -0.001898000 |
| H | -1.548973000 | 2.225818000  | -0.981575000 |
| H | -1.820416000 | 2.281824000  | 0.769072000  |
| C | 4.430278000  | -0.240715000 | -1.444808000 |
| H | 5.143907000  | 0.488426000  | -1.848672000 |
| H | 4.492652000  | -0.220673000 | -0.350479000 |
| H | 4.740996000  | -1.235348000 | -1.785816000 |
| C | 2.896557000  | 0.049359000  | -3.432588000 |
| H | 1.852993000  | 0.183869000  | -3.743162000 |
| H | 3.497874000  | 0.856089000  | -3.870428000 |
| H | 3.260439000  | -0.897345000 | -3.847862000 |
| C | -0.511543000 | 4.565102000  | -0.566892000 |
| H | 0.189079000  | 5.399599000  | -0.432577000 |
| H | -0.656911000 | 4.396264000  | -1.640784000 |
| H | -1.472915000 | 4.866243000  | -0.134698000 |
| C | 0.307878000  | 3.590762000  | 1.582886000  |
| H | -0.568993000 | 4.005871000  | 2.094107000  |
| H | 0.610268000  | 2.676493000  | 2.108933000  |
| H | 1.122542000  | 4.322718000  | 1.656505000  |
| C | 2.317183000  | -0.867051000 | 2.671011000  |
| C | 3.186696000  | -1.637412000 | 3.655718000  |
| H | 2.702023000  | -2.559673000 | 3.997119000  |
| H | 4.171390000  | -1.880014000 | 3.239604000  |
| H | 3.350164000  | -1.002476000 | 4.532750000  |
| C | 1.000729000  | -0.520731000 | 3.355467000  |
| H | 1.212448000  | 0.037731000  | 4.275192000  |
| H | 0.360081000  | 0.104041000  | 2.720462000  |
| H | 0.448277000  | -1.430195000 | 3.623543000  |
| C | 3.060840000  | 0.388502000  | 2.235011000  |
| H | 4.030897000  | 0.132787000  | 1.790494000  |
| H | 3.248595000  | 1.020768000  | 3.111239000  |
| H | 2.351814000  | -0.737042000 | -1.516738000 |
| H | 2.482872000  | 0.974029000  | 1.512108000  |
| H | -0.028479000 | -1.699898000 | -1.767401000 |
| H | -1.228880000 | -0.711564000 | 1.014762000  |
| B | -2.302761000 | -0.355890000 | 0.422363000  |
| O | -2.762575000 | -0.904680000 | -0.733621000 |
| O | -3.255106000 | 0.183522000  | 1.223628000  |
| C | -4.219087000 | -0.931512000 | -0.612913000 |
| C | -4.490371000 | 0.183894000  | 0.446021000  |
| C | -4.582786000 | -2.324184000 | -0.127630000 |
| C | -4.822002000 | -0.677293000 | -1.975224000 |
| C | -5.641363000 | -0.099772000 | 1.384186000  |
| C | -4.636035000 | 1.569004000  | -0.158501000 |
| H | -5.668845000 | -2.444251000 | -0.045369000 |
| H | -4.214972000 | -3.061482000 | -0.849937000 |
| H | -4.133900000 | -2.545330000 | 0.848318000  |
| H | -4.565114000 | -1.502394000 | -2.649297000 |
| H | -5.915579000 | -0.628691000 | -1.904512000 |

|   |              |              |              |
|---|--------------|--------------|--------------|
| H | -4.458194000 | 0.253532000  | -2.419792000 |
| H | -5.751408000 | 0.728908000  | 2.092725000  |
| H | -6.579488000 | -0.188769000 | 0.822574000  |
| H | -5.485795000 | -1.019197000 | 1.956140000  |
| H | -5.587889000 | 1.664705000  | -0.693180000 |
| H | -4.622867000 | 2.312651000  | 0.646609000  |
| H | -3.821184000 | 1.803222000  | -0.853696000 |

### 3a-cis'

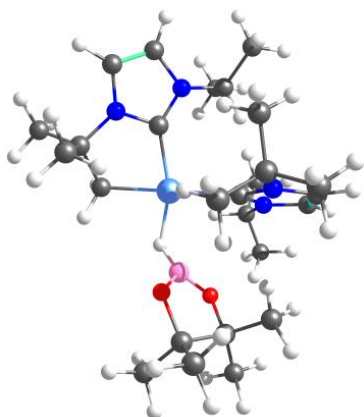

|    |              |              |              |
|----|--------------|--------------|--------------|
| Pt | -0.434660000 | -0.597187000 | -0.558058000 |
| N  | -3.326503000 | 0.437104000  | 0.181161000  |
| N  | -3.020061000 | -1.693873000 | 0.043646000  |
| N  | 0.489834000  | 1.804050000  | 1.393782000  |
| N  | 0.653309000  | 2.324286000  | -0.695846000 |
| C  | -2.384835000 | -0.504041000 | -0.074187000 |
| C  | -4.535920000 | -0.175656000 | 0.468068000  |
| C  | -4.339438000 | -1.515388000 | 0.390841000  |
| C  | 0.283774000  | 1.312977000  | 0.133153000  |
| C  | 1.043093000  | 3.438581000  | 0.018119000  |
| C  | 0.937509000  | 3.115790000  | 1.325494000  |
| H  | -5.429550000 | 0.391104000  | 0.688450000  |
| H  | -5.022437000 | -2.339950000 | 0.541709000  |
| H  | 1.372996000  | 4.352135000  | -0.456913000 |
| H  | 1.161185000  | 3.708758000  | 2.198409000  |
| C  | 0.648837000  | 2.284560000  | -2.172048000 |
| C  | -0.412419000 | 3.222106000  | -2.716293000 |
| H  | -0.163769000 | 4.268360000  | -2.496475000 |
| H  | -0.478613000 | 3.118294000  | -3.804821000 |
| H  | -1.397191000 | 3.004975000  | -2.289587000 |
| C  | 2.024350000  | 2.620985000  | -2.720783000 |
| H  | 2.018960000  | 2.503073000  | -3.810053000 |
| H  | 2.292435000  | 3.663184000  | -2.506017000 |
| H  | 2.790032000  | 1.959614000  | -2.303260000 |
| C  | -3.194344000 | 1.888391000  | -0.058587000 |
| C  | -2.278025000 | -2.945432000 | -0.238079000 |
| C  | -1.116963000 | -2.501732000 | -1.134187000 |
| H  | -1.453665000 | -2.471070000 | -2.182026000 |
| H  | -0.307315000 | -3.243041000 | -1.070590000 |
| C  | -3.928316000 | 2.691553000  | 0.998499000  |
| H  | -5.015642000 | 2.606278000  | 0.884134000  |
| H  | -3.661935000 | 2.382980000  | 2.014388000  |
| H  | -3.673086000 | 3.750309000  | 0.883206000  |
| C  | -3.712702000 | 2.201457000  | -1.452571000 |
| H  | -3.179336000 | 1.625255000  | -2.218282000 |

|   |              |              |              |
|---|--------------|--------------|--------------|
| H | -4.781159000 | 1.959548000  | -1.523600000 |
| H | -3.596333000 | 3.269366000  | -1.670554000 |
| C | -3.203534000 | -3.926003000 | -0.942059000 |
| H | -4.013624000 | -4.274751000 | -0.288491000 |
| H | -3.644248000 | -3.479374000 | -1.841750000 |
| H | -2.622324000 | -4.804315000 | -1.246236000 |
| C | -1.791377000 | -3.535255000 | 1.079064000  |
| H | -1.274153000 | -4.483904000 | 0.891724000  |
| H | -1.091155000 | -2.856922000 | 1.581945000  |
| H | -2.633585000 | -3.734506000 | 1.754142000  |
| C | 0.199828000  | 1.131194000  | 2.709124000  |
| C | 1.005018000  | 1.814125000  | 3.810693000  |
| H | 2.077237000  | 1.833686000  | 3.579611000  |
| H | 0.665082000  | 2.835618000  | 4.014222000  |
| H | 0.870899000  | 1.242136000  | 4.735022000  |
| C | 0.600897000  | -0.333954000 | 2.669072000  |
| H | 0.359093000  | -0.787521000 | 3.637486000  |
| H | 0.065697000  | -0.886625000 | 1.889318000  |
| H | 1.675759000  | -0.454893000 | 2.494037000  |
| C | -1.285978000 | 1.273015000  | 3.006807000  |
| H | -1.584769000 | 2.329027000  | 2.986869000  |
| H | -1.500608000 | 0.875564000  | 4.006018000  |
| H | -2.116579000 | 2.092787000  | 0.000778000  |
| H | -1.891409000 | 0.717826000  | 2.281144000  |
| H | 0.390704000  | 1.246369000  | -2.423163000 |
| H | 1.020340000  | -1.112630000 | -1.423691000 |
| B | 2.023466000  | -0.938794000 | -0.686454000 |
| O | 2.949377000  | -0.057442000 | -1.129537000 |
| O | 2.448794000  | -1.813416000 | 0.255081000  |
| C | 4.101629000  | -0.201255000 | -0.247084000 |
| C | 3.903512000  | -1.641920000 | 0.324421000  |
| C | 3.981426000  | 0.897939000  | 0.794190000  |
| C | 5.359258000  | -0.010387000 | -1.063774000 |
| C | 4.357211000  | -1.822866000 | 1.753899000  |
| C | 4.492955000  | -2.728027000 | -0.557951000 |
| H | 4.847923000  | 0.907930000  | 1.464787000  |
| H | 3.936787000  | 1.865259000  | 0.279064000  |
| H | 3.069844000  | 0.790100000  | 1.395176000  |
| H | 5.409897000  | 1.024015000  | -1.423669000 |
| H | 6.246111000  | -0.195140000 | -0.445175000 |
| H | 5.393238000  | -0.675595000 | -1.931372000 |
| H | 4.145509000  | -2.846764000 | 2.081693000  |
| H | 5.440379000  | -1.664327000 | 1.825707000  |
| H | 3.861463000  | -1.132565000 | 2.442938000  |
| H | 5.587958000  | -2.719052000 | -0.523026000 |
| H | 4.148869000  | -3.703618000 | -0.196856000 |
| H | 4.176092000  | -2.621102000 | -1.602166000 |

4a

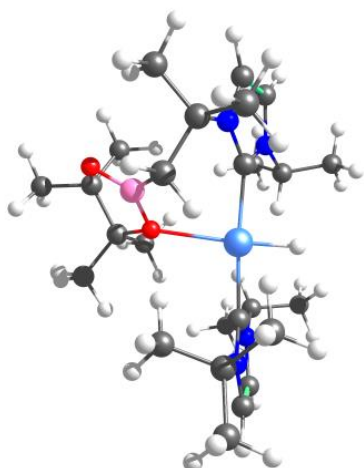

|   |              |              |              |
|---|--------------|--------------|--------------|
| C | -1.597420000 | 0.823043000  | 0.993374000  |
| C | -3.380502000 | 2.197186000  | 1.178751000  |
| H | -3.927027000 | 3.129045000  | 1.132769000  |
| C | -3.786206000 | 0.955822000  | 1.524171000  |
| H | -4.756347000 | 0.615077000  | 1.852017000  |
| C | -2.774635000 | -1.345813000 | 1.757667000  |
| C | -2.596831000 | -1.455079000 | 3.266027000  |
| H | -1.616329000 | -1.072433000 | 3.575877000  |
| H | -2.668258000 | -2.505944000 | 3.571319000  |
| H | -3.374425000 | -0.891120000 | 3.795819000  |
| C | -1.695788000 | -2.168118000 | 1.033843000  |
| H | -1.949077000 | -3.223623000 | 1.205446000  |
| H | -0.719450000 | -2.004691000 | 1.509196000  |
| C | -1.240177000 | 3.229912000  | 0.347979000  |
| H | -0.245556000 | 2.799328000  | 0.181690000  |
| C | -1.795758000 | 3.713984000  | -0.977677000 |
| H | -1.877276000 | 2.885712000  | -1.694383000 |
| H | -1.128698000 | 4.472773000  | -1.403294000 |
| H | -2.787939000 | 4.168162000  | -0.860083000 |
| C | -1.137825000 | 4.323263000  | 1.392284000  |
| H | -2.113360000 | 4.781233000  | 1.599649000  |
| H | -0.469887000 | 5.113833000  | 1.031856000  |
| H | -0.730682000 | 3.930456000  | 2.331887000  |
| C | 2.375873000  | 0.041206000  | 0.141152000  |
| C | 4.424174000  | 0.592766000  | -0.631633000 |
| H | 5.166162000  | 1.178733000  | -1.155807000 |
| C | 4.550348000  | -0.550955000 | 0.078186000  |
| H | 5.428681000  | -1.144259000 | 0.279035000  |
| C | 2.981017000  | -2.122297000 | 1.339796000  |
| C | 2.090527000  | -3.023426000 | 0.492598000  |
| H | 1.170525000  | -2.511381000 | 0.191322000  |
| H | 1.819604000  | -3.918499000 | 1.066093000  |
| H | 2.621700000  | -3.343451000 | -0.412848000 |
| C | 2.308490000  | -1.734469000 | 2.650854000  |
| H | 2.950697000  | -1.060217000 | 3.231384000  |
| H | 2.132912000  | -2.639090000 | 3.245324000  |
| H | 1.345959000  | -1.235818000 | 2.485648000  |
| C | 4.275362000  | -2.858434000 | 1.656424000  |
| H | 4.789157000  | -3.202832000 | 0.751465000  |
| H | 4.025155000  | -3.744745000 | 2.249465000  |
| H | 4.962712000  | -2.244351000 | 2.250458000  |
| C | 2.527259000  | 2.157092000  | -1.205787000 |
| H | 1.443527000  | 1.975990000  | -1.237531000 |

|    |              |              |              |
|----|--------------|--------------|--------------|
| C  | 3.044652000  | 2.334385000  | -2.620473000 |
| H  | 4.110297000  | 2.594661000  | -2.633598000 |
| H  | 2.501799000  | 3.152503000  | -3.106638000 |
| H  | 2.903192000  | 1.425710000  | -3.216708000 |
| C  | 2.813854000  | 3.363754000  | -0.331179000 |
| H  | 2.427225000  | 3.222034000  | 0.685431000  |
| H  | 2.341206000  | 4.256763000  | -0.758323000 |
| H  | 3.893925000  | 3.549609000  | -0.266739000 |
| C  | -4.148125000 | -1.870154000 | 1.344428000  |
| H  | -4.959348000 | -1.437570000 | 1.938440000  |
| H  | -4.174336000 | -2.952449000 | 1.509565000  |
| H  | -4.344483000 | -1.682926000 | 0.281941000  |
| N  | 3.289482000  | -0.884246000 | 0.550206000  |
| N  | 3.087267000  | 0.936626000  | -0.592486000 |
| N  | -2.043222000 | 2.099099000  | 0.852842000  |
| N  | -2.692670000 | 0.110296000  | 1.390015000  |
| Pt | 0.365191000  | 0.302462000  | 0.566018000  |
| H  | 0.845842000  | 1.267688000  | 1.678783000  |
| B  | -1.587418000 | -1.885441000 | -0.502380000 |
| O  | -0.526520000 | -1.157489000 | -1.018088000 |
| O  | -2.480894000 | -2.236399000 | -1.463230000 |
| C  | -0.652112000 | -1.151236000 | -2.478318000 |
| C  | -2.172016000 | -1.455788000 | -2.651198000 |
| C  | 0.254494000  | -2.256134000 | -2.987823000 |
| C  | -0.207818000 | 0.187936000  | -3.016475000 |
| C  | -2.510204000 | -2.276715000 | -3.874352000 |
| C  | -3.047445000 | -0.214394000 | -2.584003000 |
| H  | 0.236418000  | -2.304668000 | -4.082111000 |
| H  | 1.286993000  | -2.047463000 | -2.681900000 |
| H  | -0.033509000 | -3.236511000 | -2.589647000 |
| H  | 0.869067000  | 0.316566000  | -2.850896000 |
| H  | -0.388150000 | 0.232421000  | -4.097787000 |
| H  | -0.734232000 | 1.023545000  | -2.542261000 |
| H  | -3.591099000 | -2.452298000 | -3.910806000 |
| H  | -2.223832000 | -1.739714000 | -4.786967000 |
| H  | -2.005854000 | -3.247468000 | -3.866015000 |
| H  | -2.937963000 | 0.402799000  | -3.482848000 |
| H  | -4.095617000 | -0.525746000 | -2.510789000 |
| H  | -2.813628000 | 0.404450000  | -1.706552000 |

#### 4a-cis

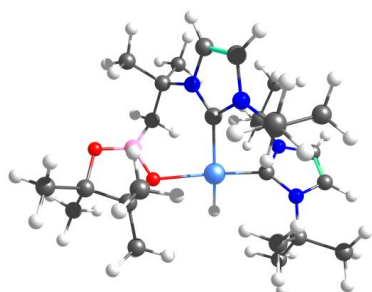

|    |              |              |              |
|----|--------------|--------------|--------------|
| Pt | 0.141824000  | -0.491805000 | -0.547929000 |
| N  | 0.400033000  | 1.371574000  | 1.975576000  |
| N  | -1.057178000 | 2.284383000  | 0.679812000  |
| N  | 3.145100000  | -1.043473000 | -0.334157000 |
| N  | 2.674800000  | 0.955632000  | -1.038096000 |
| C  | -0.257239000 | 1.180613000  | 0.800384000  |



|   |              |              |              |
|---|--------------|--------------|--------------|
| C | 0.049828000  | 2.568952000  | 2.566122000  |
| C | -0.860854000 | 3.143771000  | 1.753223000  |
| C | 2.102706000  | -0.211863000 | -0.644579000 |
| C | 4.051868000  | 0.866167000  | -0.988020000 |
| C | 4.344786000  | -0.376499000 | -0.553842000 |
| H | 0.470681000  | 2.899544000  | 3.505638000  |
| H | -1.381169000 | 4.084944000  | 1.851639000  |
| H | 4.695456000  | 1.692043000  | -1.256449000 |
| H | 5.306251000  | -0.832723000 | -0.380800000 |
| C | 1.968843000  | 2.169603000  | -1.492058000 |
| C | 2.291926000  | 3.338795000  | -0.579979000 |
| H | 3.360517000  | 3.587737000  | -0.612071000 |
| H | 1.737390000  | 4.227170000  | -0.903931000 |
| H | 2.015626000  | 3.121538000  | 0.460184000  |
| C | 2.289867000  | 2.447782000  | -2.948106000 |
| H | 1.695739000  | 3.299771000  | -3.298349000 |
| H | 3.348399000  | 2.700546000  | -3.088707000 |
| H | 2.052559000  | 1.580781000  | -3.575729000 |
| C | 1.339078000  | 0.420576000  | 2.592302000  |
| C | -2.055104000 | 2.657730000  | -0.380120000 |
| C | -2.299839000 | 1.521199000  | -1.377258000 |
| H | -1.376914000 | 1.305000000  | -1.935679000 |
| H | -3.018854000 | 1.920375000  | -2.105864000 |
| C | 0.859779000  | 0.017654000  | 3.974715000  |
| H | 0.896082000  | 0.859939000  | 4.677680000  |
| H | -0.167687000 | -0.363495000 | 3.948197000  |
| H | 1.509603000  | -0.770622000 | 4.372209000  |
| C | 2.746824000  | 0.986503000  | 2.613706000  |
| H | 3.068674000  | 1.303394000  | 1.614122000  |
| H | 2.817334000  | 1.850845000  | 3.287321000  |
| H | 3.448063000  | 0.224183000  | 2.975837000  |
| C | -1.519351000 | 3.875042000  | -1.125892000 |
| H | -1.286783000 | 4.701141000  | -0.443686000 |
| H | -0.614421000 | 3.621583000  | -1.692147000 |
| H | -2.274782000 | 4.229759000  | -1.836853000 |
| C | -3.372462000 | 2.998427000  | 0.317145000  |
| H | -4.152638000 | 3.142686000  | -0.438807000 |
| H | -3.690693000 | 2.185950000  | 0.981348000  |
| H | -3.311140000 | 3.921918000  | 0.902123000  |
| C | 3.116623000  | -2.514743000 | 0.007082000  |
| C | 4.462467000  | -2.910903000 | 0.608097000  |
| H | 5.276800000  | -2.892324000 | -0.124661000 |
| H | 4.731207000  | -2.278591000 | 1.463568000  |
| H | 4.380460000  | -3.942140000 | 0.967875000  |
| C | 2.898914000  | -3.299730000 | -1.280717000 |
| H | 2.975302000  | -4.373358000 | -1.070991000 |
| H | 1.913618000  | -3.103086000 | -1.715265000 |
| H | 3.666765000  | -3.040660000 | -2.020250000 |
| C | 2.045000000  | -2.827067000 | 1.042133000  |
| H | 2.281540000  | -2.358368000 | 2.006783000  |
| H | 2.023488000  | -3.912272000 | 1.196986000  |
| H | 1.303599000  | -0.452277000 | 1.933802000  |
| H | 1.047253000  | -2.506649000 | 0.721428000  |
| H | 0.905303000  | 1.921962000  | -1.402737000 |
| H | 0.393477000  | -1.707514000 | -1.574547000 |
| B | -2.866028000 | 0.186215000  | -0.791310000 |
| O | -4.141911000 | -0.091410000 | -0.431031000 |

|   |              |              |              |
|---|--------------|--------------|--------------|
| O | -2.030009000 | -0.907747000 | -0.601205000 |
| C | -4.231989000 | -1.520279000 | -0.164448000 |
| C | -2.764465000 | -1.901463000 | 0.194454000  |
| C | -4.726083000 | -2.165960000 | -1.447654000 |
| C | -5.222823000 | -1.744016000 | 0.954730000  |
| C | -2.339769000 | -3.286266000 | -0.230462000 |
| C | -2.404395000 | -1.651401000 | 1.646559000  |
| H | -4.911927000 | -3.236890000 | -1.310832000 |
| H | -5.669799000 | -1.691328000 | -1.737238000 |
| H | -4.013047000 | -2.036889000 | -2.270305000 |
| H | -6.226569000 | -1.463495000 | 0.616839000  |
| H | -5.245527000 | -2.803654000 | 1.237224000  |
| H | -4.982821000 | -1.149249000 | 1.841156000  |
| H | -1.309804000 | -3.478844000 | 0.092164000  |
| H | -2.986370000 | -4.034906000 | 0.243205000  |
| H | -2.387815000 | -3.418434000 | -1.315536000 |
| H | -2.878096000 | -2.391354000 | 2.301033000  |
| H | -1.316453000 | -1.745551000 | 1.758715000  |
| H | -2.698742000 | -0.647701000 | 1.980163000  |

### Int1

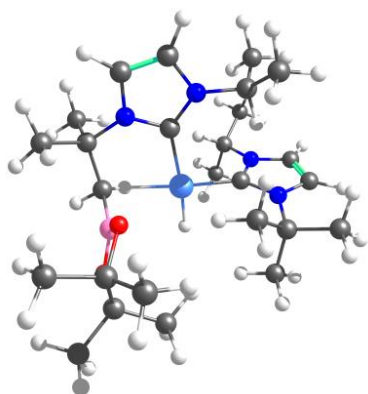

|    |              |              |              |
|----|--------------|--------------|--------------|
| Pt | -0.319961000 | -0.100474000 | -0.854950000 |
| N  | -1.005135000 | -1.765560000 | 1.849277000  |
| N  | 0.600442000  | -2.549557000 | 0.652059000  |
| N  | -2.137636000 | 2.043006000  | 0.374335000  |
| N  | -3.183128000 | 0.587237000  | -0.851716000 |
| C  | -0.324147000 | -1.555164000 | 0.698073000  |
| C  | -0.529652000 | -2.889642000 | 2.502159000  |
| C  | 0.479809000  | -3.383595000 | 1.748128000  |
| C  | -1.952568000 | 0.945230000  | -0.407218000 |
| C  | -4.138333000 | 1.457458000  | -0.362388000 |
| C  | -3.489822000 | 2.362331000  | 0.401063000  |
| H  | -0.940441000 | -3.233591000 | 3.441109000  |
| H  | 1.113614000  | -4.244016000 | 1.905104000  |
| H  | -5.188481000 | 1.357562000  | -0.595425000 |
| H  | -3.879180000 | 3.197463000  | 0.961688000  |
| C  | -3.460161000 | -0.470470000 | -1.850626000 |
| C  | -4.824363000 | -1.090767000 | -1.623666000 |
| H  | -5.632303000 | -0.398484000 | -1.891140000 |
| H  | -4.924833000 | -1.969156000 | -2.269499000 |
| H  | -4.968421000 | -1.411085000 | -0.585748000 |
| C  | -3.336446000 | 0.109935000  | -3.248673000 |
| H  | -3.511501000 | -0.672360000 | -3.995797000 |

|   |              |              |              |
|---|--------------|--------------|--------------|
| H | -4.084396000 | 0.899387000  | -3.399423000 |
| H | -2.340559000 | 0.533955000  | -3.418554000 |
| C | -2.171614000 | -0.986608000 | 2.303950000  |
| C | 1.497781000  | -2.796112000 | -0.502683000 |
| C | 1.696413000  | -1.492575000 | -1.286677000 |
| H | 0.758238000  | -1.250133000 | -1.898887000 |
| H | 2.282240000  | -1.748558000 | -2.185558000 |
| C | -2.059515000 | -0.636635000 | 3.775014000  |
| H | -2.166729000 | -1.521998000 | 4.413830000  |
| H | -1.100013000 | -0.157846000 | 4.002550000  |
| H | -2.863360000 | 0.059036000  | 4.041396000  |
| C | -3.446146000 | -1.742743000 | 1.979052000  |
| H | -3.482463000 | -1.999040000 | 0.913148000  |
| H | -3.508079000 | -2.672153000 | 2.560180000  |
| H | -4.322677000 | -1.129952000 | 2.221001000  |
| C | 0.836615000  | -3.844715000 | -1.393300000 |
| H | 0.657398000  | -4.771958000 | -0.835763000 |
| H | -0.123839000 | -3.481245000 | -1.781057000 |
| H | 1.487520000  | -4.079680000 | -2.243784000 |
| C | 2.846079000  | -3.305781000 | -0.004879000 |
| H | 3.543801000  | -3.353706000 | -0.849311000 |
| H | 3.267187000  | -2.641122000 | 0.756682000  |
| H | 2.768178000  | -4.317619000 | 0.408796000  |
| C | -1.085298000 | 2.915712000  | 1.005030000  |
| C | -1.735587000 | 3.775694000  | 2.081997000  |
| H | -2.430355000 | 4.517770000  | 1.674213000  |
| H | -2.258025000 | 3.161466000  | 2.826488000  |
| H | -0.943669000 | 4.327713000  | 2.598979000  |
| C | -0.510928000 | 3.802753000  | -0.092698000 |
| H | 0.235984000  | 4.485752000  | 0.330316000  |
| H | -0.030221000 | 3.206559000  | -0.877124000 |
| H | -1.304433000 | 4.406166000  | -0.551139000 |
| C | -0.006931000 | 2.073012000  | 1.669340000  |
| H | -0.430137000 | 1.434567000  | 2.455287000  |
| H | 0.717568000  | 2.750554000  | 2.138212000  |
| H | -2.137830000 | -0.064031000 | 1.717018000  |
| H | 0.533024000  | 1.436807000  | 0.958519000  |
| H | -2.678373000 | -1.226152000 | -1.693336000 |
| H | -0.194077000 | 0.950651000  | -2.084484000 |
| B | 2.553074000  | -0.313366000 | -0.661620000 |
| O | 3.228396000  | 0.540332000  | -1.488331000 |
| O | 2.849508000  | -0.143149000 | 0.662358000  |
| C | 3.918441000  | 1.496004000  | -0.642786000 |
| C | 4.018995000  | 0.722951000  | 0.709566000  |
| C | 3.043413000  | 2.734519000  | -0.565706000 |
| C | 5.246941000  | 1.834227000  | -1.282670000 |
| C | 3.943101000  | 1.588475000  | 1.946660000  |
| C | 5.229682000  | -0.193676000 | 0.784942000  |
| H | 3.542948000  | 3.547929000  | -0.026440000 |
| H | 2.828177000  | 3.080883000  | -1.583674000 |
| H | 2.089910000  | 2.520373000  | -0.071406000 |
| H | 5.075718000  | 2.380619000  | -2.217337000 |
| H | 5.841792000  | 2.477391000  | -0.622339000 |
| H | 5.829043000  | 0.937779000  | -1.514977000 |
| H | 4.008381000  | 0.960178000  | 2.842429000  |
| H | 4.783206000  | 2.293487000  | 1.970011000  |
| H | 3.009339000  | 2.157103000  | 1.996404000  |

|   |             |              |              |
|---|-------------|--------------|--------------|
| H | 6.159747000 | 0.378188000  | 0.879039000  |
| H | 5.137637000 | -0.836075000 | 1.668326000  |
| H | 5.305767000 | -0.837845000 | -0.100257000 |

## Int2

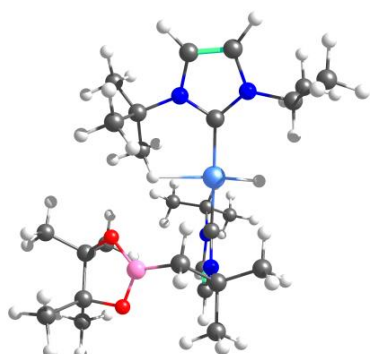

|    |              |              |              |
|----|--------------|--------------|--------------|
| Pt | -1.121426000 | -0.489722000 | 0.041689000  |
| N  | 0.983582000  | -2.266056000 | 1.343978000  |
| N  | 1.537593000  | -1.965253000 | -0.722826000 |
| N  | -2.739520000 | 2.044927000  | 0.276880000  |
| N  | -4.025188000 | 0.522980000  | -0.550204000 |
| C  | 0.568549000  | -1.681015000 | 0.193993000  |
| C  | 2.203033000  | -2.889179000 | 1.167680000  |
| C  | 2.549994000  | -2.702338000 | -0.127014000 |
| C  | -2.763921000 | 0.737084000  | -0.103684000 |
| C  | -4.781477000 | 1.676305000  | -0.446968000 |
| C  | -3.973105000 | 2.634507000  | 0.060543000  |
| H  | 2.712072000  | -3.409185000 | 1.967160000  |
| H  | 3.429095000  | -3.031335000 | -0.659014000 |
| H  | -5.822328000 | 1.715138000  | -0.735475000 |
| H  | -4.173774000 | 3.673151000  | 0.280190000  |
| C  | -4.568294000 | -0.769552000 | -1.014598000 |
| C  | -5.342399000 | -1.437195000 | 0.106801000  |
| H  | -6.201928000 | -0.822759000 | 0.405040000  |
| H  | -5.721425000 | -2.409622000 | -0.226982000 |
| H  | -4.708426000 | -1.597614000 | 0.986711000  |
| C  | -5.405471000 | -0.582562000 | -2.265215000 |
| H  | -5.687052000 | -1.564759000 | -2.659031000 |
| H  | -6.334423000 | -0.037537000 | -2.057908000 |
| H  | -4.852070000 | -0.046618000 | -3.044159000 |
| C  | 0.233106000  | -2.264514000 | 2.615536000  |
| C  | 1.518450000  | -1.564468000 | -2.175924000 |
| C  | 1.505534000  | -0.030053000 | -2.267484000 |
| H  | 0.506145000  | 0.343683000  | -1.997416000 |
| H  | 1.665364000  | 0.237736000  | -3.322151000 |
| C  | 0.891098000  | -1.337999000 | 3.620088000  |
| H  | 1.919965000  | -1.654754000 | 3.836947000  |
| H  | 0.917713000  | -0.305955000 | 3.250311000  |
| H  | 0.329725000  | -1.349468000 | 4.561102000  |
| C  | 0.086000000  | -3.680259000 | 3.139816000  |
| H  | -0.342065000 | -4.344542000 | 2.380832000  |
| H  | 1.049969000  | -4.094407000 | 3.461116000  |
| H  | -0.578221000 | -3.680984000 | 4.010635000  |
| C  | 0.290219000  | -2.173523000 | -2.840715000 |
| H  | 0.293352000  | -3.265631000 | -2.733038000 |
| H  | -0.641338000 | -1.781649000 | -2.419253000 |

|   |              |              |              |
|---|--------------|--------------|--------------|
| H | 0.308876000  | -1.934349000 | -3.910699000 |
| C | 2.756031000  | -2.123704000 | -2.867426000 |
| H | 2.709607000  | -1.833638000 | -3.922639000 |
| H | 3.686541000  | -1.723909000 | -2.453599000 |
| H | 2.777996000  | -3.219335000 | -2.828399000 |
| C | -1.536188000 | 2.789999000  | 0.739921000  |
| C | -1.944156000 | 3.734742000  | 1.863922000  |
| H | -2.627302000 | 4.516523000  | 1.515739000  |
| H | -2.423764000 | 3.188141000  | 2.684547000  |
| H | -1.050402000 | 4.233229000  | 2.255009000  |
| C | -0.962152000 | 3.567406000  | -0.438527000 |
| H | -0.074724000 | 4.128139000  | -0.119700000 |
| H | -0.665911000 | 2.891411000  | -1.249939000 |
| H | -1.694288000 | 4.282588000  | -0.832150000 |
| C | -0.503903000 | 1.811789000  | 1.279000000  |
| H | -0.903272000 | 1.195392000  | 2.093890000  |
| H | 0.350098000  | 2.374260000  | 1.677316000  |
| H | -0.757107000 | -1.869917000 | 2.348648000  |
| H | -0.006243000 | 1.220864000  | 0.467698000  |
| H | -3.687859000 | -1.372823000 | -1.263270000 |
| H | -1.860814000 | -1.735345000 | -0.477283000 |
| B | 2.582330000  | 0.658646000  | -1.354686000 |
| O | 3.910776000  | 0.330642000  | -1.360399000 |
| O | 2.273575000  | 1.619542000  | -0.426215000 |
| C | 4.592394000  | 1.271285000  | -0.494063000 |
| C | 3.438032000  | 1.767399000  | 0.426528000  |
| C | 5.161118000  | 2.359994000  | -1.389251000 |
| C | 5.710346000  | 0.544591000  | 0.220235000  |
| C | 3.546822000  | 3.210200000  | 0.867219000  |
| C | 3.208669000  | 0.865447000  | 1.630382000  |
| H | 5.769783000  | 3.072337000  | -0.820561000 |
| H | 5.802231000  | 1.894902000  | -2.146489000 |
| H | 4.369550000  | 2.913053000  | -1.908776000 |
| H | 6.477814000  | 0.247044000  | -0.503424000 |
| H | 6.183846000  | 1.197439000  | 0.963661000  |
| H | 5.350523000  | -0.358832000 | 0.722850000  |
| H | 2.697034000  | 3.466093000  | 1.511799000  |
| H | 4.465502000  | 3.368476000  | 1.445837000  |
| H | 3.548093000  | 3.899344000  | 0.017056000  |
| H | 4.030095000  | 0.936259000  | 2.352951000  |
| H | 2.287312000  | 1.178107000  | 2.136478000  |
| H | 3.095982000  | -0.187246000 | 1.332868000  |

### Int3

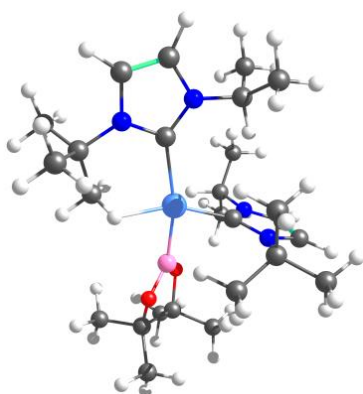

|    |             |             |              |
|----|-------------|-------------|--------------|
| Pt | 0.256620000 | 0.427239000 | -0.052611000 |
|----|-------------|-------------|--------------|

|   |              |              |              |
|---|--------------|--------------|--------------|
| N | 3.520541000  | -0.283841000 | -0.100077000 |
| N | 3.064629000  | 1.812105000  | -0.050788000 |
| N | -0.685811000 | -2.274965000 | 1.006921000  |
| N | -0.728081000 | -2.139219000 | -1.160864000 |
| C | 2.477811000  | 0.582352000  | -0.091959000 |
| C | 4.731134000  | 0.384904000  | -0.055029000 |
| C | 4.443791000  | 1.705447000  | -0.020182000 |
| C | -0.421725000 | -1.438979000 | -0.041166000 |
| C | -1.162942000 | -3.407761000 | -0.831272000 |
| C | -1.135404000 | -3.494925000 | 0.515327000  |
| H | 5.681531000  | -0.130530000 | -0.054218000 |
| H | 5.097706000  | 2.564968000  | 0.024060000  |
| H | -1.450510000 | -4.135094000 | -1.577207000 |
| H | -1.405947000 | -4.320899000 | 1.153184000  |
| C | -0.596607000 | -1.656036000 | -2.549999000 |
| C | 0.604380000  | -2.311282000 | -3.203969000 |
| H | 0.470073000  | -3.398389000 | -3.274593000 |
| H | 0.740322000  | -1.921525000 | -4.218787000 |
| H | 1.518015000  | -2.111357000 | -2.632387000 |
| C | -1.878467000 | -1.894275000 | -3.323811000 |
| H | -1.801098000 | -1.415345000 | -4.306136000 |
| H | -2.056821000 | -2.963355000 | -3.495178000 |
| H | -2.734676000 | -1.465828000 | -2.793593000 |
| C | 3.422763000  | -1.748887000 | -0.210168000 |
| C | 2.355065000  | 3.116361000  | 0.019285000  |
| C | 0.872187000  | 2.889642000  | -0.226044000 |
| H | 0.671553000  | 2.473560000  | -1.227065000 |
| H | 0.321560000  | 3.835751000  | -0.175815000 |
| C | 4.111083000  | -2.417114000 | 0.966670000  |
| H | 5.197685000  | -2.273092000 | 0.917630000  |
| H | 3.755197000  | -2.021676000 | 1.924007000  |
| H | 3.921454000  | -3.496124000 | 0.944089000  |
| C | 4.013010000  | -2.209484000 | -1.532313000 |
| H | 3.585490000  | -1.660481000 | -2.379061000 |
| H | 5.100189000  | -2.061113000 | -1.546937000 |
| H | 3.820128000  | -3.278444000 | -1.677728000 |
| C | 2.904157000  | 4.039409000  | -1.061485000 |
| H | 3.956885000  | 4.289636000  | -0.890015000 |
| H | 2.809364000  | 3.580010000  | -2.052707000 |
| H | 2.337908000  | 4.977670000  | -1.059531000 |
| C | 2.562628000  | 3.708122000  | 1.407633000  |
| H | 2.034526000  | 4.665571000  | 1.486123000  |
| H | 2.172079000  | 3.031905000  | 2.178587000  |
| H | 3.624245000  | 3.889980000  | 1.610876000  |
| C | -0.434256000 | -2.010143000 | 2.468139000  |
| C | -0.978158000 | -3.172543000 | 3.287808000  |
| H | -2.054299000 | -3.316360000 | 3.131992000  |
| H | -0.454934000 | -4.113097000 | 3.080893000  |
| H | -0.823173000 | -2.940532000 | 4.346706000  |
| C | -1.142829000 | -0.738446000 | 2.908369000  |
| H | -0.994898000 | -0.611514000 | 3.987211000  |
| H | -0.750822000 | 0.149647000  | 2.401778000  |
| H | -2.221478000 | -0.799034000 | 2.714253000  |
| C | 1.069019000  | -1.905059000 | 2.679758000  |
| H | 1.566072000  | -2.831822000 | 2.365547000  |
| H | 1.282293000  | -1.744044000 | 3.743351000  |
| H | 2.344568000  | -1.959887000 | -0.187182000 |

|   |              |              |              |
|---|--------------|--------------|--------------|
| H | 1.489879000  | -1.065276000 | 2.112978000  |
| H | -0.421000000 | -0.576807000 | -2.453139000 |
| H | 0.416381000  | 2.316858000  | 0.628379000  |
| B | -1.783512000 | 0.753792000  | -0.069984000 |
| O | -2.669341000 | 0.333354000  | -1.035564000 |
| O | -2.400006000 | 1.522333000  | 0.892738000  |
| C | -4.002403000 | 0.593435000  | -0.532168000 |
| C | -3.756134000 | 1.777247000  | 0.445162000  |
| C | -4.448738000 | -0.685520000 | 0.161192000  |
| C | -4.922222000 | 0.904463000  | -1.691361000 |
| C | -4.674051000 | 1.809315000  | 1.646916000  |
| C | -3.744362000 | 3.131531000  | -0.245637000 |
| H | -5.482370000 | -0.620378000 | 0.520124000  |
| H | -4.391094000 | -1.510903000 | -0.559498000 |
| H | -3.797041000 | -0.934882000 | 1.010050000  |
| H | -5.043207000 | 0.013258000  | -2.318834000 |
| H | -5.916593000 | 1.192314000  | -1.326799000 |
| H | -4.534105000 | 1.712520000  | -2.319016000 |
| H | -4.435501000 | 2.676428000  | 2.273891000  |
| H | -5.720551000 | 1.902445000  | 1.329716000  |
| H | -4.573487000 | 0.908762000  | 2.260981000  |
| H | -4.749832000 | 3.433240000  | -0.561809000 |
| H | -3.369295000 | 3.884525000  | 0.457341000  |
| H | -3.087738000 | 3.130471000  | -1.124810000 |

#### Int4

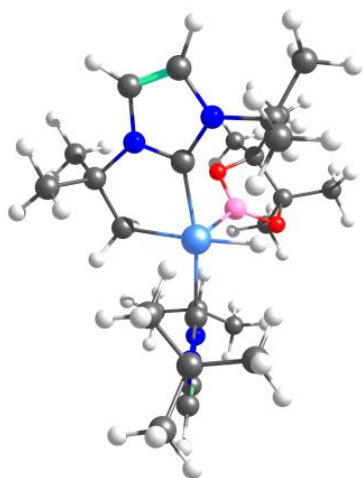

|   |              |              |              |
|---|--------------|--------------|--------------|
| C | 1.235703000  | -1.579046000 | 0.298443000  |
| C | 3.072355000  | -2.847521000 | 0.373637000  |
| H | 3.934641000  | -3.375677000 | -0.007885000 |
| C | 2.595523000  | -2.740666000 | 1.640931000  |
| H | 2.963764000  | -3.157966000 | 2.567855000  |
| C | 0.508077000  | -1.605341000 | 2.660685000  |
| C | -0.273346000 | -2.871271000 | 2.993314000  |
| H | -0.861192000 | -3.203501000 | 2.127744000  |
| H | -0.963113000 | -2.672607000 | 3.821883000  |
| H | 0.392763000  | -3.689704000 | 3.294441000  |
| C | -0.421354000 | -0.508979000 | 2.115974000  |
| H | -0.079422000 | 0.474370000  | 2.472275000  |
| H | -1.430981000 | -0.661448000 | 2.523283000  |
| C | 2.312644000  | -2.042644000 | -1.919476000 |
| H | 1.945515000  | -1.038723000 | -2.174209000 |
| C | 3.745809000  | -2.191204000 | -2.388832000 |
| H | 4.423934000  | -1.506982000 | -1.866739000 |

|    |              |              |              |
|----|--------------|--------------|--------------|
| H  | 3.792127000  | -1.965596000 | -3.459246000 |
| H  | 4.110585000  | -3.217256000 | -2.256896000 |
| C  | 1.407474000  | -3.091021000 | -2.541092000 |
| H  | 1.721355000  | -4.096238000 | -2.230453000 |
| H  | 1.466883000  | -3.036970000 | -3.633811000 |
| H  | 0.360741000  | -2.946151000 | -2.248136000 |
| C  | -2.261015000 | 0.540640000  | -0.166466000 |
| C  | -4.007947000 | 1.939704000  | 0.076344000  |
| H  | -4.518775000 | 2.853437000  | 0.345344000  |
| C  | -4.482708000 | 0.789695000  | -0.445659000 |
| H  | -5.491000000 | 0.520787000  | -0.718045000 |
| C  | -3.521077000 | -1.447150000 | -1.174351000 |
| C  | -2.702070000 | -2.428555000 | -0.347097000 |
| H  | -1.612571000 | -2.266287000 | -0.430513000 |
| H  | -2.865742000 | -3.443894000 | -0.727249000 |
| H  | -2.994757000 | -2.401748000 | 0.708963000  |
| C  | -3.057050000 | -1.402439000 | -2.624253000 |
| H  | -3.677149000 | -0.707249000 | -3.203247000 |
| H  | -3.150881000 | -2.399167000 | -3.072334000 |
| H  | -2.011457000 | -1.084167000 | -2.702318000 |
| C  | -4.976670000 | -1.897507000 | -1.120411000 |
| H  | -5.373412000 | -1.873002000 | -0.098354000 |
| H  | -5.029567000 | -2.930887000 | -1.478698000 |
| H  | -5.622290000 | -1.297604000 | -1.771176000 |
| C  | -1.788915000 | 2.810331000  | 0.840303000  |
| H  | -0.766917000 | 2.422411000  | 0.754273000  |
| C  | -2.130913000 | 3.001037000  | 2.306584000  |
| H  | -3.140560000 | 3.413876000  | 2.426439000  |
| H  | -1.425348000 | 3.707300000  | 2.759428000  |
| H  | -2.075731000 | 2.055758000  | 2.858429000  |
| C  | -1.913667000 | 4.098004000  | 0.047904000  |
| H  | -1.672976000 | 3.939647000  | -1.009553000 |
| H  | -1.229213000 | 4.850981000  | 0.452433000  |
| H  | -2.928396000 | 4.509008000  | 0.116384000  |
| C  | 1.298782000  | -1.130359000 | 3.871247000  |
| H  | 1.939562000  | -1.917271000 | 4.289952000  |
| H  | 0.597782000  | -0.820879000 | 4.655097000  |
| H  | 1.926208000  | -0.268435000 | 3.612116000  |
| N  | -3.406302000 | -0.072848000 | -0.585403000 |
| N  | -2.646301000 | 1.769918000  | 0.244663000  |
| N  | 2.224483000  | -2.121223000 | -0.444800000 |
| N  | 1.465484000  | -1.954910000 | 1.572221000  |
| Pt | -0.393607000 | -0.411451000 | -0.047208000 |
| H  | -0.246656000 | -0.350337000 | -1.686214000 |
| B  | 0.997294000  | 1.051050000  | -0.285447000 |
| O  | 0.983361000  | 2.012427000  | -1.248237000 |
| O  | 2.059891000  | 1.128631000  | 0.568605000  |
| C  | 2.092170000  | 2.919039000  | -0.948486000 |
| C  | 3.015185000  | 2.032729000  | -0.058412000 |
| C  | 1.518573000  | 4.112612000  | -0.208510000 |
| C  | 2.707772000  | 3.366364000  | -2.255075000 |
| C  | 3.769377000  | 2.771797000  | 1.022544000  |
| C  | 3.966178000  | 1.160086000  | -0.859067000 |
| H  | 2.293635000  | 4.863968000  | -0.019225000 |
| H  | 0.741859000  | 4.575564000  | -0.826167000 |
| H  | 1.074346000  | 3.824588000  | 0.752542000  |
| H  | 1.995868000  | 3.993056000  | -2.804022000 |



|   |             |             |              |
|---|-------------|-------------|--------------|
| H | 3.607178000 | 3.965463000 | -2.065743000 |
| H | 2.979340000 | 2.520960000 | -2.893963000 |
| H | 4.396304000 | 2.066692000 | 1.580289000  |
| H | 4.428638000 | 3.528472000 | 0.579940000  |
| H | 3.098811000 | 3.263860000 | 1.733147000  |
| H | 4.775719000 | 1.750362000 | -1.303131000 |
| H | 4.410899000 | 0.416154000 | -0.186481000 |
| H | 3.443578000 | 0.625909000 | -1.663037000 |

### Int5

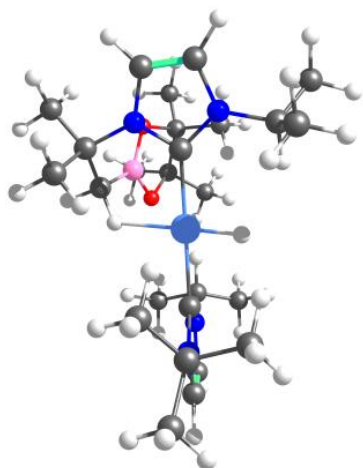

|   |              |              |              |
|---|--------------|--------------|--------------|
| C | 0.707348000  | -1.787326000 | 0.002065000  |
| C | 2.113123000  | -3.500305000 | -0.385121000 |
| H | 2.588153000  | -4.289203000 | -0.950816000 |
| C | 2.305998000  | -3.099137000 | 0.893740000  |
| H | 2.990949000  | -3.470794000 | 1.640666000  |
| C | 1.293391000  | -1.290166000 | 2.396054000  |
| C | 0.092062000  | -1.848168000 | 3.149701000  |
| H | -0.827456000 | -1.740464000 | 2.560264000  |
| H | -0.038335000 | -1.309996000 | 4.096301000  |
| H | 0.238557000  | -2.911619000 | 3.375528000  |
| C | 1.100455000  | 0.194238000  | 2.065737000  |
| H | 1.117072000  | 0.753239000  | 3.014832000  |
| H | 0.045553000  | 0.407021000  | 1.741897000  |
| C | 0.580018000  | -2.832809000 | -2.279151000 |
| H | 0.108005000  | -1.867315000 | -2.498487000 |
| C | 1.676939000  | -3.089190000 | -3.293695000 |
| H | 2.459645000  | -2.323342000 | -3.245237000 |
| H | 1.245784000  | -3.071618000 | -4.300084000 |
| H | 2.140790000  | -4.073471000 | -3.155488000 |
| C | -0.470784000 | -3.928489000 | -2.274618000 |
| H | -0.017702000 | -4.893395000 | -2.011598000 |
| H | -0.923105000 | -4.025876000 | -3.267928000 |
| H | -1.265827000 | -3.713270000 | -1.550218000 |
| C | -2.347423000 | 0.999923000  | -0.084165000 |
| C | -3.444655000 | 2.956177000  | -0.320376000 |
| H | -3.559494000 | 4.015723000  | -0.503267000 |
| C | -4.361551000 | 2.008317000  | -0.025590000 |
| H | -5.429098000 | 2.102133000  | 0.095876000  |
| C | -4.380472000 | -0.503428000 | 0.355139000  |
| C | -3.641857000 | -1.313064000 | 1.411669000  |
| H | -2.648381000 | -1.624899000 | 1.066168000  |
| H | -4.221742000 | -2.216017000 | 1.636041000  |
| H | -3.530046000 | -0.737884000 | 2.339861000  |

|    |              |              |              |
|----|--------------|--------------|--------------|
| C  | -4.447490000 | -1.252133000 | -0.970425000 |
| H  | -4.981219000 | -0.658906000 | -1.723379000 |
| H  | -4.986252000 | -2.197341000 | -0.833114000 |
| H  | -3.446606000 | -1.481699000 | -1.353760000 |
| C  | -5.795916000 | -0.239821000 | 0.855280000  |
| H  | -5.800777000 | 0.362651000  | 1.771729000  |
| H  | -6.260510000 | -1.204493000 | 1.085590000  |
| H  | -6.423724000 | 0.247458000  | 0.100947000  |
| C  | -0.950599000 | 3.016197000  | -0.637073000 |
| H  | -0.190497000 | 2.225054000  | -0.631171000 |
| C  | -0.638708000 | 4.006057000  | 0.468265000  |
| H  | -1.378746000 | 4.815883000  | 0.502912000  |
| H  | 0.345341000  | 4.457193000  | 0.298787000  |
| H  | -0.619277000 | 3.512193000  | 1.447292000  |
| C  | -1.001363000 | 3.658633000  | -2.010094000 |
| H  | -1.227788000 | 2.917238000  | -2.785381000 |
| H  | -0.032122000 | 4.114522000  | -2.242157000 |
| H  | -1.757759000 | 4.452056000  | -2.056622000 |
| C  | 2.546531000  | -1.463117000 | 3.245989000  |
| H  | 2.663855000  | -2.498524000 | 3.584910000  |
| H  | 2.444462000  | -0.842090000 | 4.142649000  |
| H  | 3.451198000  | -1.154781000 | 2.712642000  |
| N  | -3.683763000 | 0.808579000  | 0.126215000  |
| N  | -2.220338000 | 2.322634000  | -0.353645000 |
| N  | 1.137249000  | -2.679573000 | -0.921060000 |
| N  | 1.439737000  | -2.046864000 | 1.118967000  |
| Pt | -0.769047000 | -0.357785000 | -0.057265000 |
| H  | -1.386838000 | -0.909301000 | -1.351076000 |
| B  | 2.149295000  | 0.837643000  | 1.077339000  |
| O  | 1.968406000  | 2.069564000  | 0.510990000  |
| O  | 3.320903000  | 0.239436000  | 0.706240000  |
| C  | 3.206154000  | 2.409814000  | -0.166527000 |
| C  | 3.843546000  | 1.009073000  | -0.407040000 |
| C  | 4.003866000  | 3.277447000  | 0.792490000  |
| C  | 2.884699000  | 3.180326000  | -1.427496000 |
| C  | 5.354302000  | 0.978936000  | -0.358576000 |
| C  | 3.342284000  | 0.326890000  | -1.671640000 |
| H  | 4.922188000  | 3.652263000  | 0.326277000  |
| H  | 3.392836000  | 4.140662000  | 1.081561000  |
| H  | 4.274062000  | 2.731695000  | 1.704422000  |
| H  | 2.460952000  | 4.157831000  | -1.167758000 |
| H  | 3.798086000  | 3.358150000  | -2.008900000 |
| H  | 2.167826000  | 2.648337000  | -2.062113000 |
| H  | 5.709585000  | -0.044120000 | -0.527497000 |
| H  | 5.777078000  | 1.615421000  | -1.145663000 |
| H  | 5.739186000  | 1.317853000  | 0.607946000  |
| H  | 3.744936000  | 0.800824000  | -2.574326000 |
| H  | 3.677956000  | -0.717759000 | -1.658389000 |
| H  | 2.244340000  | 0.337091000  | -1.729104000 |

TS1

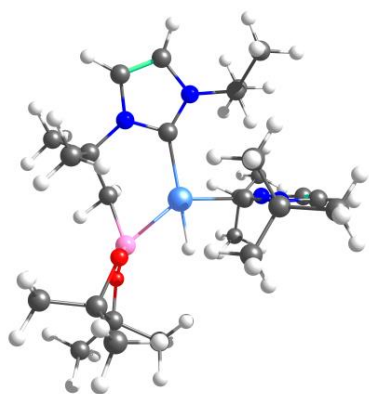

|    |              |              |              |
|----|--------------|--------------|--------------|
| Pt | 0.000484000  | 0.034583000  | -0.430667000 |
| N  | 2.356540000  | 2.133648000  | 0.416008000  |
| N  | 0.400796000  | 2.936476000  | 0.030254000  |
| N  | 1.729100000  | -2.041766000 | 1.072057000  |
| N  | 2.260287000  | -1.842303000 | -1.020722000 |
| C  | 1.102246000  | 1.778503000  | 0.054342000  |
| C  | 2.434659000  | 3.502591000  | 0.613255000  |
| C  | 1.199390000  | 4.007405000  | 0.381952000  |
| C  | 1.418140000  | -1.371518000 | -0.070365000 |
| C  | 3.100356000  | -2.799975000 | -0.486200000 |
| C  | 2.772926000  | -2.921481000 | 0.819226000  |
| H  | 3.353618000  | 3.999077000  | 0.891983000  |
| H  | 0.832846000  | 5.022357000  | 0.442271000  |
| H  | 3.849712000  | -3.313092000 | -1.071233000 |
| H  | 3.195925000  | -3.562155000 | 1.576222000  |
| C  | 2.192558000  | -1.503043000 | -2.459958000 |
| C  | 3.569418000  | -1.536353000 | -3.094094000 |
| H  | 3.944970000  | -2.562143000 | -3.193555000 |
| H  | 3.504834000  | -1.117249000 | -4.103635000 |
| H  | 4.301113000  | -0.951069000 | -2.527134000 |
| C  | 1.233509000  | -2.449352000 | -3.160691000 |
| H  | 1.166778000  | -2.193528000 | -4.224069000 |
| H  | 1.594929000  | -3.483064000 | -3.080885000 |
| H  | 0.227746000  | -2.394508000 | -2.729435000 |
| C  | 3.513543000  | 1.223131000  | 0.501599000  |
| C  | -1.059788000 | 2.958193000  | -0.190990000 |
| C  | -1.436284000 | 1.701247000  | -0.991540000 |
| H  | -0.993091000 | 1.733117000  | -1.998380000 |
| H  | -2.503507000 | 1.840442000  | -1.234256000 |
| C  | 4.344857000  | 1.519592000  | 1.734960000  |
| H  | 4.881989000  | 2.471404000  | 1.641222000  |
| H  | 3.727750000  | 1.554772000  | 2.640278000  |
| H  | 5.096505000  | 0.732806000  | 1.861084000  |
| C  | 4.330707000  | 1.305779000  | -0.773700000 |
| H  | 3.714206000  | 1.092163000  | -1.655711000 |
| H  | 4.765003000  | 2.307211000  | -0.891850000 |
| H  | 5.153093000  | 0.581339000  | -0.738685000 |
| C  | -1.418352000 | 4.186055000  | -1.021333000 |
| H  | -1.212558000 | 5.117282000  | -0.481419000 |
| H  | -0.866675000 | 4.198722000  | -1.968841000 |
| H  | -2.490955000 | 4.172193000  | -1.245741000 |
| C  | -1.747275000 | 3.020182000  | 1.166746000  |
| H  | -2.835762000 | 3.029393000  | 1.038932000  |
| H  | -1.482383000 | 2.155628000  | 1.784587000  |
| H  | -1.456294000 | 3.937682000  | 1.692796000  |

|   |              |              |              |
|---|--------------|--------------|--------------|
| C | 1.053378000  | -1.900588000 | 2.411383000  |
| C | 1.695822000  | -2.865112000 | 3.398863000  |
| H | 1.577556000  | -3.911010000 | 3.092482000  |
| H | 2.759871000  | -2.652481000 | 3.556481000  |
| H | 1.190878000  | -2.744065000 | 4.362988000  |
| C | -0.422013000 | -2.251977000 | 2.267807000  |
| H | -0.881113000 | -2.263923000 | 3.263755000  |
| H | -0.959983000 | -1.520005000 | 1.655532000  |
| H | -0.542995000 | -3.248281000 | 1.822942000  |
| C | 1.238535000  | -0.478691000 | 2.922280000  |
| H | 2.305250000  | -0.241376000 | 3.028185000  |
| H | 0.769062000  | -0.386699000 | 3.908816000  |
| H | 3.078347000  | 0.221529000  | 0.594931000  |
| H | 0.774134000  | 0.256136000  | 2.254633000  |
| H | 1.796158000  | -0.478760000 | -2.491539000 |
| H | -0.836907000 | -1.282924000 | -0.838692000 |
| B | -2.224944000 | 0.209278000  | -0.437531000 |
| O | -3.061740000 | -0.347697000 | -1.389423000 |
| O | -2.740728000 | 0.119602000  | 0.835288000  |
| C | -4.044423000 | -1.124747000 | -0.667623000 |
| C | -4.095169000 | -0.391983000 | 0.707297000  |
| C | -3.526651000 | -2.552423000 | -0.566447000 |
| C | -5.342164000 | -1.103391000 | -1.446507000 |
| C | -4.390741000 | -1.282842000 | 1.893397000  |
| C | -5.022145000 | 0.812257000  | 0.712011000  |
| H | -4.271821000 | -3.216352000 | -0.113026000 |
| H | -3.311222000 | -2.922466000 | -1.575934000 |
| H | -2.602636000 | -2.616152000 | 0.020759000  |
| H | -5.210695000 | -1.639041000 | -2.393881000 |
| H | -6.139362000 | -1.606591000 | -0.885058000 |
| H | -5.665946000 | -0.083869000 | -1.677396000 |
| H | -4.400091000 | -0.685547000 | 2.812800000  |
| H | -5.378285000 | -1.749024000 | 1.786522000  |
| H | -3.643062000 | -2.073970000 | 2.008869000  |
| H | -6.074741000 | 0.508263000  | 0.679506000  |
| H | -4.863180000 | 1.379560000  | 1.636331000  |
| H | -4.829560000 | 1.478006000  | -0.138996000 |

## TS2

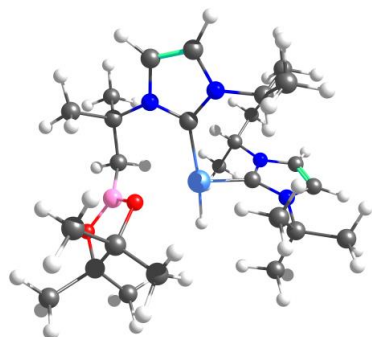

|    |              |              |              |
|----|--------------|--------------|--------------|
| Pt | 0.130476000  | -0.152728000 | -0.546461000 |
| N  | 0.972827000  | 1.867248000  | 1.783883000  |
| N  | -0.719278000 | 2.584506000  | 0.660642000  |
| N  | 2.568841000  | -1.870426000 | -0.003502000 |
| N  | 2.989580000  | -0.111042000 | -1.216214000 |
| C  | 0.183303000  | 1.564582000  | 0.724256000  |
| C  | 0.583711000  | 3.056388000  | 2.371793000  |

|   |              |              |              |
|---|--------------|--------------|--------------|
| C | -0.477856000 | 3.506333000  | 1.667760000  |
| C | 1.993031000  | -0.779235000 | -0.583023000 |
| C | 4.186930000  | -0.782252000 | -1.051915000 |
| C | 3.927310000  | -1.870643000 | -0.296818000 |
| H | 1.089002000  | 3.471676000  | 3.232705000  |
| H | -1.072630000 | 4.398268000  | 1.799858000  |
| H | 5.116584000  | -0.431135000 | -1.474970000 |
| H | 4.604234000  | -2.631076000 | 0.058029000  |
| C | 2.804572000  | 1.090820000  | -2.061806000 |
| C | 4.064364000  | 1.932561000  | -2.099128000 |
| H | 4.860606000  | 1.450056000  | -2.678895000 |
| H | 3.837385000  | 2.883476000  | -2.591880000 |
| H | 4.448015000  | 2.152213000  | -1.096557000 |
| C | 2.364780000  | 0.678169000  | -3.454950000 |
| H | 2.208237000  | 1.568716000  | -4.074437000 |
| H | 3.137470000  | 0.061760000  | -3.932736000 |
| H | 1.429168000  | 0.108095000  | -3.427490000 |
| C | 2.127373000  | 1.079135000  | 2.248220000  |
| C | -1.763484000 | 2.834160000  | -0.380298000 |
| C | -1.988400000 | 1.611074000  | -1.277332000 |
| H | -1.034455000 | 1.327017000  | -1.777554000 |
| H | -2.598039000 | 1.949351000  | -2.127440000 |
| C | 1.971756000  | 0.719394000  | 3.713203000  |
| H | 2.014653000  | 1.609643000  | 4.353207000  |
| H | 1.019520000  | 0.207180000  | 3.895854000  |
| H | 2.788021000  | 0.054813000  | 4.018605000  |
| C | 3.416551000  | 1.823260000  | 1.956556000  |
| H | 3.479596000  | 2.087953000  | 0.893741000  |
| H | 3.487481000  | 2.745578000  | 2.547256000  |
| H | 4.278103000  | 1.193988000  | 2.207468000  |
| C | -1.282695000 | 4.002855000  | -1.235340000 |
| H | -1.087764000 | 4.893263000  | -0.626508000 |
| H | -0.361503000 | 3.739286000  | -1.771145000 |
| H | -2.049130000 | 4.259607000  | -1.975623000 |
| C | -3.075962000 | 3.180913000  | 0.316683000  |
| H | -3.872644000 | 3.250771000  | -0.433403000 |
| H | -3.348750000 | 2.405218000  | 1.043387000  |
| H | -3.033053000 | 4.143355000  | 0.837718000  |
| C | 1.889484000  | -2.985489000 | 0.754860000  |
| C | 2.950830000  | -3.835929000 | 1.442477000  |
| H | 3.581283000  | -4.379605000 | 0.729873000  |
| H | 3.587585000  | -3.239548000 | 2.107050000  |
| H | 2.436689000  | -4.583798000 | 2.055222000  |
| C | 1.129133000  | -3.855425000 | -0.238704000 |
| H | 0.682473000  | -4.705449000 | 0.291051000  |
| H | 0.328008000  | -3.302284000 | -0.739117000 |
| H | 1.811842000  | -4.249036000 | -1.002164000 |
| C | 0.973820000  | -2.417713000 | 1.830828000  |
| H | 1.554035000  | -1.875875000 | 2.588092000  |
| H | 0.462884000  | -3.250211000 | 2.329224000  |
| H | 2.101194000  | 0.163697000  | 1.649918000  |
| H | 0.211763000  | -1.741840000 | 1.421827000  |
| H | 1.999636000  | 1.657080000  | -1.574118000 |
| H | -0.061422000 | -1.397426000 | -1.554706000 |
| B | -2.756677000 | 0.373135000  | -0.673732000 |
| O | -3.811650000 | -0.217996000 | -1.299384000 |
| O | -2.404819000 | -0.238075000 | 0.504596000  |

|   |              |              |              |
|---|--------------|--------------|--------------|
| C | -4.069467000 | -1.472410000 | -0.612855000 |
| C | -3.448676000 | -1.219545000 | 0.795299000  |
| C | -3.355716000 | -2.557952000 | -1.401593000 |
| C | -5.559794000 | -1.730448000 | -0.607646000 |
| C | -2.825624000 | -2.433612000 | 1.444058000  |
| C | -4.400990000 | -0.534012000 | 1.761028000  |
| H | -3.553042000 | -3.550572000 | -0.981079000 |
| H | -3.723678000 | -2.545812000 | -2.433570000 |
| H | -2.270168000 | -2.397628000 | -1.425274000 |
| H | -5.905843000 | -1.906902000 | -1.632434000 |
| H | -5.790861000 | -2.624919000 | -0.015974000 |
| H | -6.123805000 | -0.886397000 | -0.200406000 |
| H | -2.407455000 | -2.161135000 | 2.420376000  |
| H | -3.588262000 | -3.205329000 | 1.608254000  |
| H | -2.026027000 | -2.864757000 | 0.832425000  |
| H | -5.172962000 | -1.225144000 | 2.118300000  |
| H | -3.832920000 | -0.182191000 | 2.629823000  |
| H | -4.896503000 | 0.329799000  | 1.301797000  |

### TS3

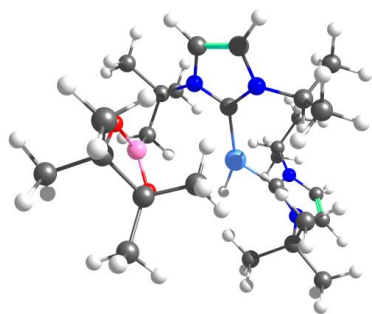

|    |              |              |              |
|----|--------------|--------------|--------------|
| Pt | -0.856198000 | -0.283738000 | -0.618064000 |
| N  | 0.541796000  | -1.201862000 | 2.095174000  |
| N  | 1.539686000  | -2.101220000 | 0.410797000  |
| N  | -3.002339000 | 1.805544000  | -0.144549000 |
| N  | -3.788100000 | -0.187488000 | -0.529565000 |
| C  | 0.482620000  | -1.311382000 | 0.747594000  |
| C  | 1.621027000  | -1.900837000 | 2.601269000  |
| C  | 2.249642000  | -2.462643000 | 1.541958000  |
| C  | -2.640839000 | 0.528124000  | -0.446360000 |
| C  | -4.869339000 | 0.619933000  | -0.232188000 |
| C  | -4.383171000 | 1.856836000  | 0.005683000  |
| H  | 1.842530000  | -1.945609000 | 3.658845000  |
| H  | 3.136367000  | -3.076626000 | 1.509987000  |
| H  | -5.884056000 | 0.249234000  | -0.215734000 |
| H  | -4.908651000 | 2.763720000  | 0.259087000  |
| C  | -3.876046000 | -1.637112000 | -0.806120000 |
| C  | -3.990406000 | -2.401441000 | 0.499568000  |
| H  | -4.912644000 | -2.131298000 | 1.030347000  |
| H  | -4.014640000 | -3.479028000 | 0.303486000  |
| H  | -3.137031000 | -2.190238000 | 1.155961000  |
| C  | -5.020935000 | -1.929331000 | -1.755218000 |
| H  | -4.987433000 | -2.984968000 | -2.044274000 |
| H  | -5.995580000 | -1.750801000 | -1.284227000 |
| H  | -4.955697000 | -1.322123000 | -2.664720000 |
| C  | -0.451068000 | -0.512546000 | 2.939826000  |
| C  | 1.867722000  | -2.522014000 | -0.993672000 |
| C  | 2.015888000  | -1.264009000 | -1.860959000 |

|   |              |              |              |
|---|--------------|--------------|--------------|
| H | 1.017605000  | -0.841108000 | -2.092083000 |
| H | 2.414646000  | -1.575195000 | -2.838290000 |
| C | 0.204494000  | 0.607528000  | 3.725511000  |
| H | 0.952365000  | 0.216219000  | 4.426764000  |
| H | 0.694527000  | 1.329377000  | 3.060803000  |
| H | -0.552567000 | 1.139799000  | 4.312290000  |
| C | -1.155165000 | -1.516809000 | 3.833887000  |
| H | -1.582996000 | -2.337540000 | 3.246967000  |
| H | -0.465354000 | -1.944565000 | 4.572142000  |
| H | -1.965537000 | -1.023059000 | 4.381230000  |
| C | 0.738252000  | -3.412293000 | -1.499676000 |
| H | 0.635961000  | -4.304498000 | -0.869475000 |
| H | -0.221355000 | -2.877635000 | -1.510527000 |
| H | 0.959242000  | -3.734924000 | -2.524130000 |
| C | 3.165012000  | -3.318160000 | -1.000502000 |
| H | 3.381102000  | -3.600823000 | -2.036508000 |
| H | 4.013141000  | -2.735245000 | -0.627695000 |
| H | 3.074805000  | -4.245205000 | -0.421879000 |
| C | -2.088861000 | 2.984673000  | 0.067565000  |
| C | -2.932707000 | 4.235966000  | 0.268855000  |
| H | -3.575852000 | 4.444574000  | -0.594038000 |
| H | -3.547583000 | 4.183226000  | 1.174694000  |
| H | -2.250864000 | 5.084405000  | 0.387422000  |
| C | -1.203052000 | 3.184474000  | -1.155144000 |
| H | -0.618867000 | 4.102567000  | -1.018422000 |
| H | -0.501669000 | 2.355382000  | -1.297598000 |
| H | -1.807099000 | 3.293753000  | -2.064497000 |
| C | -1.260315000 | 2.735345000  | 1.319554000  |
| H | -1.912951000 | 2.562886000  | 2.185461000  |
| H | -0.638664000 | 3.614591000  | 1.529564000  |
| H | -1.173749000 | -0.092489000 | 2.226553000  |
| H | -0.600223000 | 1.868965000  | 1.190308000  |
| H | -2.923713000 | -1.884076000 | -1.293965000 |
| H | -1.358690000 | 0.302420000  | -1.988157000 |
| B | 2.903634000  | -0.125076000 | -1.237804000 |
| O | 4.048152000  | -0.341815000 | -0.519706000 |
| O | 2.570991000  | 1.201111000  | -1.327683000 |
| C | 4.627015000  | 0.957921000  | -0.236236000 |
| C | 3.390629000  | 1.897888000  | -0.356398000 |
| C | 5.680892000  | 1.213211000  | -1.300399000 |
| C | 5.263830000  | 0.913791000  | 1.135432000  |
| C | 3.684996000  | 3.290659000  | -0.865114000 |
| C | 2.572841000  | 1.965960000  | 0.924733000  |
| H | 6.224283000  | 2.146444000  | -1.112252000 |
| H | 6.404706000  | 0.390571000  | -1.288271000 |
| H | 5.240262000  | 1.263408000  | -2.303079000 |
| H | 6.132426000  | 0.245442000  | 1.119007000  |
| H | 5.613562000  | 1.910530000  | 1.432259000  |
| H | 4.567689000  | 0.544828000  | 1.895738000  |
| H | 2.752432000  | 3.865405000  | -0.918973000 |
| H | 4.364813000  | 3.814800000  | -0.181723000 |
| H | 4.131843000  | 3.279336000  | -1.863881000 |
| H | 3.099204000  | 2.512206000  | 1.716003000  |
| H | 1.629468000  | 2.488208000  | 0.717569000  |
| H | 2.327585000  | 0.960127000  | 1.295318000  |

TS4

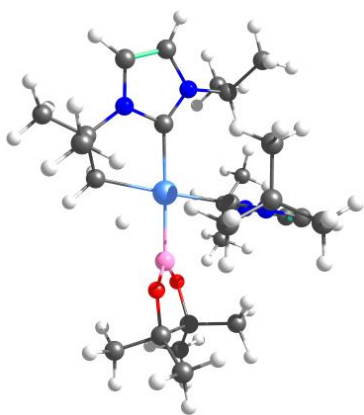

|    |              |              |              |
|----|--------------|--------------|--------------|
| Pt | 0.264626000  | 0.628484000  | -0.507632000 |
| N  | 3.341320000  | -0.367042000 | 0.125900000  |
| N  | 2.960876000  | 1.722876000  | -0.210533000 |
| N  | -0.372379000 | -1.225549000 | 1.779467000  |
| N  | -0.375773000 | -2.439229000 | -0.011474000 |
| C  | 2.368052000  | 0.505044000  | -0.218648000 |
| C  | 4.530166000  | 0.304907000  | 0.362575000  |
| C  | 4.287459000  | 1.623962000  | 0.158154000  |
| C  | -0.210225000 | -1.164368000 | 0.432275000  |
| C  | -0.628225000 | -3.280354000 | 1.064827000  |
| C  | -0.619110000 | -2.523171000 | 2.183636000  |
| H  | 5.441244000  | -0.210116000 | 0.634994000  |
| H  | 4.944451000  | 2.479357000  | 0.232593000  |
| H  | -0.806956000 | -4.339271000 | 0.948511000  |
| H  | -0.770076000 | -2.794410000 | 3.219163000  |
| C  | -0.381339000 | -2.980282000 | -1.415344000 |
| C  | 0.506433000  | -4.221869000 | -1.449525000 |
| H  | 0.108384000  | -5.043723000 | -0.845234000 |
| H  | 0.572325000  | -4.581133000 | -2.482516000 |
| H  | 1.523187000  | -3.993867000 | -1.103705000 |
| C  | -1.819949000 | -3.338357000 | -1.771999000 |
| H  | -1.843723000 | -3.806055000 | -2.763584000 |
| H  | -2.248767000 | -4.049030000 | -1.054830000 |
| H  | -2.442455000 | -2.435693000 | -1.798267000 |
| C  | 3.200282000  | -1.834408000 | 0.130759000  |
| C  | 2.171800000  | 2.944059000  | -0.486483000 |
| C  | 0.986730000  | 2.520890000  | -1.368053000 |
| H  | 1.325744000  | 2.224312000  | -2.368681000 |
| H  | 0.361735000  | 3.413120000  | -1.503079000 |
| C  | 3.499494000  | -2.414598000 | 1.499258000  |
| H  | 4.548967000  | -2.258580000 | 1.779971000  |
| H  | 2.862732000  | -1.972889000 | 2.274030000  |
| H  | 3.313912000  | -3.495075000 | 1.482866000  |
| C  | 4.071457000  | -2.444137000 | -0.952723000 |
| H  | 3.854561000  | -2.007057000 | -1.934460000 |
| H  | 5.136895000  | -2.294068000 | -0.736127000 |
| H  | 3.893918000  | -3.524373000 | -1.008358000 |
| C  | 3.035805000  | 3.942272000  | -1.246003000 |
| H  | 3.867095000  | 4.308033000  | -0.631046000 |
| H  | 3.444528000  | 3.498180000  | -2.161423000 |
| H  | 2.427244000  | 4.810182000  | -1.523932000 |
| C  | 1.708610000  | 3.542541000  | 0.835895000  |
| H  | 1.125355000  | 4.452346000  | 0.649936000  |
| H  | 1.079982000  | 2.835228000  | 1.391623000  |



|   |              |              |              |
|---|--------------|--------------|--------------|
| H | 2.570602000  | 3.811096000  | 1.459393000  |
| C | -0.280476000 | -0.072195000 | 2.699904000  |
| C | -1.416713000 | -0.096996000 | 3.704144000  |
| H | -2.389275000 | -0.224350000 | 3.212648000  |
| H | -1.293296000 | -0.898913000 | 4.443136000  |
| H | -1.433214000 | 0.851200000  | 4.252073000  |
| C | 1.079439000  | -0.032667000 | 3.371083000  |
| H | 1.247731000  | -0.940342000 | 3.965927000  |
| H | 1.135663000  | 0.828799000  | 4.046512000  |
| H | 2.145641000  | -2.006346000 | -0.112488000 |
| H | 1.887142000  | 0.058281000  | 2.632986000  |
| H | -0.473574000 | 1.933826000  | -1.111669000 |
| B | -1.838738000 | 0.794076000  | -0.444757000 |
| O | -2.706425000 | 0.019006000  | -1.173959000 |
| O | -2.485036000 | 1.578282000  | 0.480330000  |
| C | -3.989126000 | 0.076947000  | -0.491665000 |
| C | -3.911273000 | 1.452127000  | 0.230269000  |
| C | -4.025688000 | -1.096594000 | 0.476777000  |
| C | -5.093793000 | -0.053258000 | -1.515344000 |
| C | -4.649153000 | 1.524627000  | 1.548441000  |
| C | -4.306124000 | 2.621361000  | -0.657005000 |
| H | -4.969418000 | -1.127357000 | 1.033529000  |
| H | -3.935703000 | -2.034023000 | -0.084351000 |
| H | -3.196669000 | -1.048690000 | 1.196570000  |
| H | -5.050062000 | -1.047022000 | -1.976745000 |
| H | -6.076948000 | 0.053456000  | -1.040007000 |
| H | -5.006814000 | 0.693427000  | -2.310092000 |
| H | -4.548489000 | 2.529763000  | 1.974317000  |
| H | -5.718538000 | 1.327469000  | 1.401730000  |
| H | -4.258762000 | 0.807610000  | 2.278215000  |
| H | -5.388220000 | 2.648149000  | -0.829698000 |
| H | -4.019051000 | 3.555449000  | -0.160957000 |
| H | -3.798828000 | 2.580102000  | -1.628385000 |
| H | -0.391188000 | 0.807130000  | 2.052408000  |
| C | 0.151569000  | -1.969813000 | -2.415465000 |
| H | -0.457854000 | -1.060106000 | -2.449544000 |
| H | 1.193776000  | -1.700471000 | -2.210307000 |
| H | 0.114736000  | -2.435434000 | -3.407491000 |

### TS5

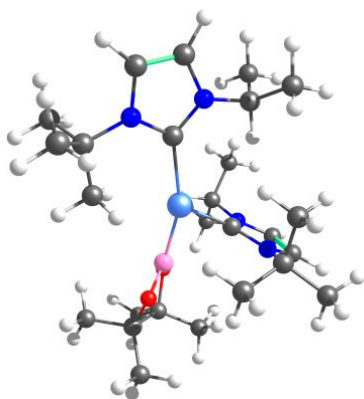

|    |              |              |              |
|----|--------------|--------------|--------------|
| Pt | 0.338431000  | 0.296175000  | -0.046598000 |
| N  | 3.520338000  | -0.454318000 | -0.133838000 |
| N  | 3.209739000  | 1.666761000  | -0.018467000 |
| N  | -1.031242000 | -2.194656000 | 1.030851000  |
| N  | -1.110470000 | -2.051878000 | -1.138309000 |

|   |              |              |              |
|---|--------------|--------------|--------------|
| C | 2.543372000  | 0.482132000  | -0.071032000 |
| C | 4.774037000  | 0.128463000  | -0.128111000 |
| C | 4.579395000  | 1.464698000  | -0.057105000 |
| C | -0.668456000 | -1.408694000 | -0.027517000 |
| C | -1.719923000 | -3.241366000 | -0.792041000 |
| C | -1.669733000 | -3.333824000 | 0.553729000  |
| H | 5.686761000  | -0.450222000 | -0.168344000 |
| H | 5.291704000  | 2.277507000  | -0.032824000 |
| H | -2.132289000 | -3.917535000 | -1.527415000 |
| H | -2.045954000 | -4.109287000 | 1.201375000  |
| C | -0.891919000 | -1.623413000 | -2.534716000 |
| C | 0.214175000  | -2.459013000 | -3.152028000 |
| H | -0.084165000 | -3.513050000 | -3.222883000 |
| H | 0.434092000  | -2.102633000 | -4.164538000 |
| H | 1.135078000  | -2.400274000 | -2.559226000 |
| C | -2.179016000 | -1.695829000 | -3.332069000 |
| H | -2.004858000 | -1.287959000 | -4.333897000 |
| H | -2.524979000 | -2.729791000 | -3.455801000 |
| H | -2.966595000 | -1.105930000 | -2.852341000 |
| C | 3.302032000  | -1.905936000 | -0.254392000 |
| C | 2.603879000  | 3.026311000  | 0.031123000  |
| C | 1.093996000  | 2.902765000  | 0.131931000  |
| H | 0.671212000  | 2.394701000  | -0.762927000 |
| H | 0.628939000  | 3.895268000  | 0.130028000  |
| C | 3.977119000  | -2.640381000 | 0.888893000  |
| H | 5.069059000  | -2.558705000 | 0.821494000  |
| H | 3.661132000  | -2.245895000 | 1.861364000  |
| H | 3.723489000  | -3.705573000 | 0.847795000  |
| C | 3.783610000  | -2.392097000 | -1.609801000 |
| H | 3.335042000  | -1.809829000 | -2.423435000 |
| H | 4.875040000  | -2.313779000 | -1.693368000 |
| H | 3.515472000  | -3.445702000 | -1.747432000 |
| C | 2.980197000  | 3.764753000  | -1.247233000 |
| H | 4.066221000  | 3.876076000  | -1.342543000 |
| H | 2.607328000  | 3.230137000  | -2.129557000 |
| H | 2.539888000  | 4.768451000  | -1.237274000 |
| C | 3.130793000  | 3.752532000  | 1.263098000  |
| H | 2.652455000  | 4.735586000  | 1.341270000  |
| H | 2.904697000  | 3.185443000  | 2.174223000  |
| H | 4.213232000  | 3.914242000  | 1.212112000  |
| C | -0.649449000 | -2.005829000 | 2.475639000  |
| C | -1.404058000 | -3.018864000 | 3.326923000  |
| H | -2.489937000 | -2.925598000 | 3.201398000  |
| H | -1.103724000 | -4.052372000 | 3.121503000  |
| H | -1.170995000 | -2.817192000 | 4.377696000  |
| C | -1.019761000 | -0.611053000 | 2.957519000  |
| H | -0.787826000 | -0.541731000 | 4.026777000  |
| H | -0.457814000 | 0.171582000  | 2.435871000  |
| H | -2.090041000 | -0.412375000 | 2.822588000  |
| C | 0.848341000  | -2.251202000 | 2.595119000  |
| H | 1.100324000  | -3.259735000 | 2.241962000  |
| H | 1.156632000  | -2.166806000 | 3.644240000  |
| H | 2.211693000  | -2.026013000 | -0.182805000 |
| H | 1.415740000  | -1.517350000 | 2.008622000  |
| H | -0.568741000 | -0.577901000 | -2.457714000 |
| H | 0.787307000  | 2.422233000  | 1.075107000  |
| B | -1.646151000 | 0.831700000  | -0.082405000 |

|   |              |              |              |
|---|--------------|--------------|--------------|
| O | -2.544814000 | 0.601908000  | -1.094667000 |
| O | -2.181041000 | 1.587745000  | 0.933072000  |
| C | -3.851091000 | 0.949811000  | -0.566679000 |
| C | -3.489204000 | 2.034901000  | 0.485218000  |
| C | -4.404882000 | -0.326784000 | 0.051192000  |
| C | -4.739365000 | 1.427570000  | -1.691968000 |
| C | -4.421887000 | 2.101456000  | 1.673310000  |
| C | -3.300449000 | 3.416645000  | -0.118716000 |
| H | -5.434350000 | -0.199080000 | 0.404801000  |
| H | -4.396195000 | -1.118410000 | -0.708570000 |
| H | -3.783657000 | -0.665411000 | 0.891991000  |
| H | -4.963699000 | 0.599571000  | -2.375001000 |
| H | -5.692300000 | 1.797982000  | -1.293093000 |
| H | -4.267675000 | 2.228998000  | -2.268561000 |
| H | -4.101613000 | 2.897466000  | 2.355633000  |
| H | -5.442919000 | 2.333186000  | 1.344165000  |
| H | -4.442241000 | 1.161271000  | 2.233326000  |
| H | -4.257026000 | 3.864226000  | -0.412076000 |
| H | -2.837664000 | 4.069949000  | 0.630086000  |
| H | -2.644405000 | 3.387049000  | -0.997757000 |

### TS A

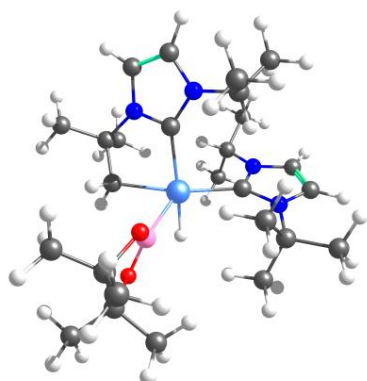

|    |              |              |              |
|----|--------------|--------------|--------------|
| Pt | 0.007426000  | -0.235505000 | -0.609353000 |
| N  | -1.892680000 | -1.260086000 | 1.849789000  |
| N  | -0.944800000 | -2.732610000 | 0.599802000  |
| N  | -1.332467000 | 2.686409000  | -0.164812000 |
| N  | -2.636534000 | 1.206640000  | -1.044964000 |
| C  | -1.036486000 | -1.403316000 | 0.816557000  |
| C  | -2.332415000 | -2.501456000 | 2.278515000  |
| C  | -1.743746000 | -3.430168000 | 1.480084000  |
| C  | -1.370050000 | 1.396270000  | -0.591784000 |
| C  | -3.382471000 | 2.361575000  | -0.915312000 |
| C  | -2.569463000 | 3.285504000  | -0.358767000 |
| H  | -3.010165000 | -2.617789000 | 3.113057000  |
| H  | -1.822905000 | -4.508554000 | 1.477692000  |
| H  | -4.415160000 | 2.429610000  | -1.224888000 |
| H  | -2.777514000 | 4.308769000  | -0.089669000 |
| C  | -3.113518000 | -0.011308000 | -1.733823000 |
| C  | -4.583916000 | -0.261151000 | -1.465475000 |
| H  | -5.221924000 | 0.482265000  | -1.958709000 |
| H  | -4.855767000 | -1.241163000 | -1.871462000 |
| H  | -4.810590000 | -0.262581000 | -0.393310000 |
| C  | -2.815682000 | 0.085435000  | -3.219325000 |
| H  | -3.138990000 | -0.830184000 | -3.727790000 |
| H  | -3.358596000 | 0.930252000  | -3.663146000 |

|   |              |              |              |
|---|--------------|--------------|--------------|
| H | -1.744631000 | 0.224169000  | -3.406756000 |
| C | -2.193703000 | 0.019845000  | 2.518714000  |
| C | -0.118570000 | -3.229684000 | -0.526655000 |
| C | 0.957792000  | -2.154688000 | -0.770782000 |
| H | 1.391509000  | -2.301157000 | -1.767814000 |
| H | 1.753752000  | -2.326799000 | -0.032354000 |
| C | -1.421077000 | 0.105343000  | 3.822191000  |
| H | -1.745537000 | -0.677147000 | 4.520091000  |
| H | -0.344234000 | -0.009107000 | 3.648789000  |
| H | -1.593515000 | 1.075572000  | 4.301804000  |
| C | -3.686583000 | 0.193031000  | 2.708924000  |
| H | -4.221508000 | 0.111150000  | 1.755358000  |
| H | -4.096105000 | -0.551463000 | 3.402965000  |
| H | -3.887611000 | 1.183605000  | 3.131099000  |
| C | -1.006714000 | -3.423735000 | -1.749284000 |
| H | -1.851254000 | -4.086124000 | -1.519985000 |
| H | -1.397542000 | -2.464956000 | -2.112427000 |
| H | -0.425043000 | -3.880293000 | -2.558698000 |
| C | 0.525060000  | -4.550206000 | -0.132359000 |
| H | 1.233609000  | -4.850768000 | -0.912595000 |
| H | 1.071204000  | -4.456027000 | 0.813817000  |
| H | -0.217825000 | -5.351799000 | -0.033524000 |
| C | -0.129027000 | 3.410967000  | 0.370116000  |
| C | -0.532446000 | 4.811057000  | 0.813390000  |
| H | -0.878461000 | 5.430655000  | -0.021895000 |
| H | -1.302777000 | 4.790964000  | 1.593495000  |
| H | 0.353124000  | 5.297890000  | 1.235477000  |
| C | 0.897678000  | 3.525112000  | -0.749342000 |
| H | 1.761942000  | 4.099958000  | -0.395122000 |
| H | 1.248449000  | 2.543909000  | -1.088318000 |
| H | 0.466494000  | 4.052759000  | -1.609311000 |
| C | 0.416307000  | 2.661198000  | 1.576810000  |
| H | -0.334077000 | 2.617641000  | 2.377116000  |
| H | 1.293661000  | 3.193961000  | 1.964008000  |
| H | -1.822711000 | 0.786958000  | 1.827114000  |
| H | 0.726505000  | 1.641297000  | 1.330224000  |
| H | -2.538328000 | -0.838851000 | -1.296807000 |
| H | 0.706290000  | 0.491933000  | -1.853642000 |
| B | 2.038058000  | -0.077587000 | -0.354923000 |
| O | 3.032290000  | 0.032914000  | -1.282183000 |
| O | 2.483873000  | -0.028432000 | 0.937716000  |
| C | 4.236365000  | 0.414970000  | -0.555420000 |
| C | 3.938937000  | -0.116545000 | 0.879152000  |
| C | 4.324491000  | 1.929871000  | -0.616323000 |
| C | 5.432790000  | -0.211388000 | -1.234056000 |
| C | 4.516984000  | 0.711653000  | 2.004309000  |
| C | 4.304655000  | -1.579049000 | 1.067819000  |
| H | 5.258991000  | 2.292566000  | -0.172794000 |
| H | 4.297273000  | 2.249022000  | -1.664641000 |
| H | 3.484560000  | 2.402863000  | -0.092794000 |
| H | 5.559880000  | 0.222662000  | -2.232453000 |
| H | 6.346619000  | -0.008124000 | -0.662021000 |
| H | 5.322686000  | -1.294317000 | -1.344493000 |
| H | 4.252804000  | 0.259309000  | 2.967257000  |
| H | 5.611492000  | 0.740074000  | 1.936318000  |
| H | 4.140912000  | 1.739220000  | 1.995834000  |
| H | 5.388831000  | -1.707706000 | 1.163041000  |

|   |             |              |             |
|---|-------------|--------------|-------------|
| H | 3.839709000 | -1.946170000 | 1.990184000 |
| H | 3.957849000 | -2.203788000 | 0.236601000 |

**TS B**

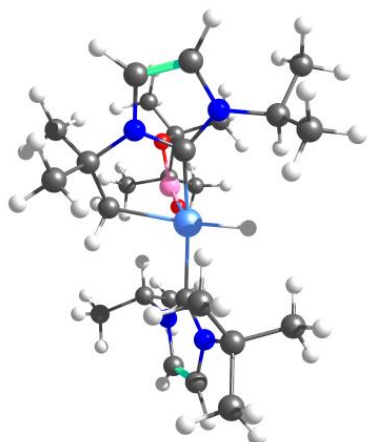

|   |              |              |              |
|---|--------------|--------------|--------------|
| C | 1.125634000  | -1.634145000 | 0.357440000  |
| C | 2.743875000  | -3.152104000 | 0.582956000  |
| H | 3.400757000  | -3.958256000 | 0.288115000  |
| C | 2.617962000  | -2.508710000 | 1.771977000  |
| H | 3.150170000  | -2.644906000 | 2.703367000  |
| C | 1.118628000  | -0.580595000 | 2.611850000  |
| C | 0.270654000  | -1.342365000 | 3.624011000  |
| H | -0.594837000 | -1.810195000 | 3.137302000  |
| H | -0.097358000 | -0.655301000 | 4.394819000  |
| H | 0.854467000  | -2.128935000 | 4.118501000  |
| C | 0.266330000  | 0.469082000  | 1.869427000  |
| H | 0.735007000  | 1.462079000  | 1.948161000  |
| H | -0.713064000 | 0.583133000  | 2.351877000  |
| C | 1.572391000  | -3.033784000 | -1.672234000 |
| H | 1.110797000  | -2.167308000 | -2.161803000 |
| C | 2.873583000  | -3.376535000 | -2.368109000 |
| H | 3.598482000  | -2.557573000 | -2.303642000 |
| H | 2.672182000  | -3.572503000 | -3.426311000 |
| H | 3.330828000  | -4.282023000 | -1.949976000 |
| C | 0.598116000  | -4.197393000 | -1.671392000 |
| H | 1.021009000  | -5.052636000 | -1.128144000 |
| H | 0.390797000  | -4.514720000 | -2.699359000 |
| H | -0.351920000 | -3.920221000 | -1.198793000 |
| C | -2.302272000 | 0.608530000  | -0.184308000 |
| C | -3.977009000 | 2.122503000  | -0.191072000 |
| H | -4.427408000 | 3.103563000  | -0.140319000 |
| C | -4.534814000 | 0.906063000  | -0.355529000 |
| H | -5.572494000 | 0.638584000  | -0.471557000 |
| C | -3.781551000 | -1.504194000 | -0.416493000 |
| C | -2.935725000 | -2.239054000 | 0.616126000  |
| H | -1.858157000 | -2.204823000 | 0.401842000  |
| H | -3.214379000 | -3.299454000 | 0.617131000  |
| H | -3.110162000 | -1.835280000 | 1.621062000  |
| C | -3.527433000 | -1.989679000 | -1.837722000 |
| H | -4.186583000 | -1.463575000 | -2.539148000 |
| H | -3.746547000 | -3.062420000 | -1.902080000 |
| H | -2.490834000 | -1.829968000 | -2.148361000 |
| C | -5.244615000 | -1.766547000 | -0.067435000 |
| H | -5.510671000 | -1.361855000 | 0.916269000  |

|    |              |              |              |
|----|--------------|--------------|--------------|
| H  | -5.394286000 | -2.850922000 | -0.036732000 |
| H  | -5.935302000 | -1.370954000 | -0.820347000 |
| C  | -1.705958000 | 3.044372000  | 0.227127000  |
| H  | -0.723331000 | 2.593725000  | 0.359068000  |
| C  | -2.118112000 | 3.733459000  | 1.515719000  |
| H  | -3.076710000 | 4.257208000  | 1.411851000  |
| H  | -1.361397000 | 4.479889000  | 1.784066000  |
| H  | -2.202615000 | 3.019278000  | 2.343191000  |
| C  | -1.651631000 | 3.997004000  | -0.951597000 |
| H  | -1.373289000 | 3.471150000  | -1.871565000 |
| H  | -0.907931000 | 4.780099000  | -0.761812000 |
| H  | -2.619503000 | 4.490490000  | -1.110739000 |
| C  | 2.315285000  | 0.063503000  | 3.298044000  |
| H  | 2.913754000  | -0.666145000 | 3.856470000  |
| H  | 1.953532000  | 0.810692000  | 4.014212000  |
| H  | 2.957543000  | 0.563233000  | 2.563773000  |
| N  | -3.509838000 | -0.024966000 | -0.334340000 |
| N  | -2.617741000 | 1.923463000  | -0.068622000 |
| N  | 1.819488000  | -2.592877000 | -0.284008000 |
| N  | 1.616830000  | -1.574322000 | 1.612536000  |
| Pt | -0.415373000 | -0.394853000 | -0.054813000 |
| H  | -0.777686000 | -1.122862000 | -1.461405000 |
| B  | 1.158134000  | 0.928247000  | -0.152720000 |
| O  | 0.953815000  | 2.099303000  | -0.828194000 |
| O  | 2.488483000  | 0.660414000  | 0.056337000  |
| C  | 2.237249000  | 2.786212000  | -0.874776000 |
| C  | 3.232365000  | 1.596141000  | -0.768439000 |
| C  | 2.285197000  | 3.712652000  | 0.327784000  |
| C  | 2.313961000  | 3.577382000  | -2.159734000 |
| C  | 4.540545000  | 1.918909000  | -0.083857000 |
| C  | 3.483312000  | 0.900766000  | -2.095695000 |
| H  | 3.200218000  | 4.315593000  | 0.331616000  |
| H  | 1.431995000  | 4.400437000  | 0.284460000  |
| H  | 2.232661000  | 3.156416000  | 1.272978000  |
| H  | 1.571131000  | 4.384065000  | -2.144893000 |
| H  | 3.305185000  | 4.035243000  | -2.268326000 |
| H  | 2.118630000  | 2.952428000  | -3.036342000 |
| H  | 5.167512000  | 1.020880000  | -0.040906000 |
| H  | 5.087182000  | 2.684728000  | -0.648400000 |
| H  | 4.392471000  | 2.283058000  | 0.937742000  |
| H  | 4.090050000  | 1.519094000  | -2.767383000 |
| H  | 4.029874000  | -0.030819000 | -1.905222000 |
| H  | 2.543333000  | 0.650237000  | -2.603807000 |

### TS C

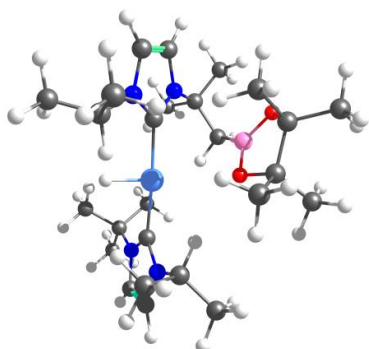

|   |              |              |             |
|---|--------------|--------------|-------------|
| C | -1.057213000 | -1.434419000 | 0.614503000 |
|---|--------------|--------------|-------------|

|   |              |              |              |
|---|--------------|--------------|--------------|
| C | -2.806630000 | -2.389796000 | 1.665600000  |
| H | -3.439846000 | -2.651607000 | 2.501639000  |
| C | -2.914235000 | -2.685440000 | 0.349492000  |
| H | -3.671644000 | -3.251958000 | -0.170214000 |
| C | -1.545275000 | -2.203263000 | -1.757125000 |
| C | -0.484968000 | -3.283029000 | -1.934876000 |
| H | 0.419743000  | -3.050344000 | -1.359786000 |
| H | -0.211050000 | -3.365282000 | -2.993919000 |
| H | -0.867663000 | -4.255308000 | -1.599661000 |
| C | -1.061451000 | -0.842569000 | -2.290604000 |
| H | -1.110460000 | -0.882803000 | -3.388402000 |
| H | 0.011779000  | -0.701136000 | -2.067720000 |
| C | -1.205915000 | -1.083796000 | 3.105691000  |
| H | -0.386500000 | -0.402018000 | 2.847135000  |
| C | -2.311930000 | -0.300085000 | 3.786310000  |
| H | -2.693002000 | 0.498696000  | 3.138541000  |
| H | -1.923766000 | 0.157222000  | 4.702888000  |
| H | -3.151829000 | -0.946553000 | 4.069704000  |
| C | -0.676360000 | -2.214127000 | 3.968616000  |
| H | -1.473429000 | -2.926910000 | 4.216463000  |
| H | -0.280530000 | -1.814390000 | 4.908781000  |
| H | 0.127369000  | -2.759405000 | 3.459908000  |
| C | 2.472715000  | 0.628135000  | -0.030668000 |
| C | 3.966740000  | 2.303232000  | 0.203160000  |
| H | 4.320199000  | 3.297199000  | 0.437792000  |
| C | 4.636435000  | 1.219599000  | -0.249668000 |
| H | 5.683501000  | 1.112006000  | -0.484206000 |
| C | 4.064059000  | -1.173651000 | -0.910654000 |
| C | 3.135631000  | -1.522518000 | -2.065187000 |
| H | 2.090657000  | -1.549399000 | -1.738769000 |
| H | 3.399408000  | -2.512194000 | -2.456797000 |
| H | 3.232359000  | -0.790393000 | -2.876740000 |
| C | 3.943635000  | -2.181213000 | 0.225703000  |
| H | 4.576951000  | -1.888456000 | 1.072530000  |
| H | 4.275312000  | -3.165951000 | -0.124731000 |
| H | 2.909839000  | -2.273383000 | 0.575733000  |
| C | 5.498114000  | -1.172686000 | -1.423539000 |
| H | 5.649576000  | -0.434530000 | -2.220047000 |
| H | 5.706832000  | -2.162145000 | -1.844201000 |
| H | 6.227831000  | -0.995745000 | -0.625092000 |
| C | 1.568286000  | 2.817362000  | 0.795556000  |
| H | 0.641419000  | 2.347621000  | 0.441214000  |
| C | 1.692701000  | 4.194348000  | 0.170892000  |
| H | 2.562098000  | 4.741854000  | 0.556038000  |
| H | 0.804982000  | 4.787443000  | 0.419837000  |
| H | 1.773077000  | 4.136109000  | -0.920522000 |
| C | 1.566351000  | 2.872111000  | 2.312018000  |
| H | 1.438422000  | 1.873190000  | 2.746354000  |
| H | 0.747666000  | 3.510048000  | 2.665689000  |
| H | 2.508942000  | 3.293894000  | 2.685325000  |
| C | -2.815381000 | -2.608257000 | -2.494278000 |
| H | -3.154279000 | -3.610599000 | -2.209392000 |
| H | -2.595043000 | -2.636400000 | -3.566785000 |
| H | -3.626415000 | -1.889626000 | -2.331876000 |
| N | 3.714333000  | 0.196291000  | -0.400280000 |
| N | 2.644691000  | 1.928745000  | 0.318569000  |
| N | -1.671530000 | -1.615995000 | 1.809529000  |

|    |              |              |              |
|----|--------------|--------------|--------------|
| N  | -1.842220000 | -2.086520000 | -0.290852000 |
| Pt | 0.678005000  | -0.389310000 | 0.236632000  |
| H  | 1.353081000  | -1.083943000 | 1.423169000  |
| B  | -1.876207000 | 0.386310000  | -1.751894000 |
| O  | -1.265547000 | 1.406112000  | -1.061665000 |
| O  | -3.228975000 | 0.529345000  | -1.840334000 |
| C  | -2.288709000 | 2.406124000  | -0.781938000 |
| C  | -3.606593000 | 1.579782000  | -0.913516000 |
| C  | -2.142799000 | 3.480250000  | -1.844865000 |
| C  | -2.061208000 | 2.992267000  | 0.594537000  |
| C  | -4.775556000 | 2.345216000  | -1.492303000 |
| C  | -4.021088000 | 0.888075000  | 0.376542000  |
| H  | -2.838043000 | 4.309519000  | -1.671185000 |
| H  | -1.122074000 | 3.879249000  | -1.809456000 |
| H  | -2.318507000 | 3.081365000  | -2.850930000 |
| H  | -1.191013000 | 3.659354000  | 0.584121000  |
| H  | -2.929009000 | 3.590560000  | 0.898923000  |
| H  | -1.891619000 | 2.213167000  | 1.347653000  |
| H  | -5.655866000 | 1.693875000  | -1.537837000 |
| H  | -5.026034000 | 3.204131000  | -0.857412000 |
| H  | -4.568009000 | 2.706998000  | -2.503776000 |
| H  | -4.436466000 | 1.599404000  | 1.100054000  |
| H  | -4.797406000 | 0.149948000  | 0.143677000  |
| H  | -3.181788000 | 0.361078000  | 0.849315000  |

#### TS D

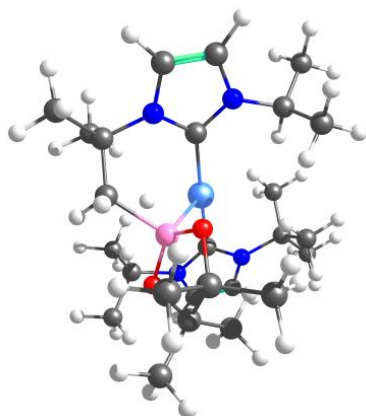

|    |              |              |              |
|----|--------------|--------------|--------------|
| C  | -2.122752000 | 0.607923000  | -0.547066000 |
| C  | -4.250907000 | 1.228392000  | -0.155398000 |
| H  | -5.052146000 | 1.853397000  | 0.213572000  |
| C  | -4.289095000 | 0.043912000  | -0.809495000 |
| H  | -5.136393000 | -0.546157000 | -1.124006000 |
| C  | -1.448619000 | -2.267568000 | -0.956539000 |
| H  | -0.627834000 | -1.108319000 | -0.909268000 |
| H  | -0.840832000 | -2.929939000 | -1.581625000 |
| C  | 2.013031000  | 0.547846000  | -0.585579000 |
| C  | 4.176079000  | 0.030847000  | -0.961700000 |
| H  | 5.010467000  | -0.547479000 | -1.333398000 |
| C  | 4.152403000  | 1.201105000  | -0.282913000 |
| H  | 4.969926000  | 1.822666000  | 0.048469000  |
| N  | -2.916624000 | 1.560504000  | -0.007687000 |
| N  | -2.975615000 | -0.331533000 | -1.039066000 |
| N  | 2.861407000  | -0.353836000 | -1.138384000 |
| N  | 2.822656000  | 1.515108000  | -0.058991000 |
| Pt | -0.061484000 | 0.522527000  | -0.543705000 |



|   |              |              |              |
|---|--------------|--------------|--------------|
| C | -2.420621000 | 2.718162000  | 0.758813000  |
| H | -1.356536000 | 2.788534000  | 0.495018000  |
| C | -3.125663000 | 3.992156000  | 0.336770000  |
| H | -2.658798000 | 4.847639000  | 0.836964000  |
| H | -3.059996000 | 4.148736000  | -0.745667000 |
| H | -4.184547000 | 3.982372000  | 0.624295000  |
| C | -2.552595000 | 2.439571000  | 2.245376000  |
| H | -2.053205000 | 1.501060000  | 2.516686000  |
| H | -2.100567000 | 3.254314000  | 2.822613000  |
| H | -3.608933000 | 2.365154000  | 2.534406000  |
| C | -2.529425000 | -1.552064000 | -1.779778000 |
| C | -3.705530000 | -2.499533000 | -1.961361000 |
| H | -3.338878000 | -3.422034000 | -2.424400000 |
| H | -4.167898000 | -2.763307000 | -1.003131000 |
| H | -4.467351000 | -2.076561000 | -2.627074000 |
| C | -2.000534000 | -1.132353000 | -3.148457000 |
| H | -1.127826000 | -0.473525000 | -3.059423000 |
| H | -1.708094000 | -2.021501000 | -3.719760000 |
| H | -2.780893000 | -0.602120000 | -3.707448000 |
| C | 2.455151000  | -1.527641000 | -1.933259000 |
| H | 1.400602000  | -1.684036000 | -1.684863000 |
| C | 2.589616000  | -1.216661000 | -3.413278000 |
| H | 2.001119000  | -0.332949000 | -3.688066000 |
| H | 3.637608000  | -1.029839000 | -3.681759000 |
| H | 2.235178000  | -2.066030000 | -4.008669000 |
| C | 3.240912000  | -2.756894000 | -1.522904000 |
| H | 2.834688000  | -3.634697000 | -2.037586000 |
| H | 4.299678000  | -2.676977000 | -1.799119000 |
| H | 3.165877000  | -2.929889000 | -0.443584000 |
| C | 2.337192000  | 2.774965000  | 0.592331000  |
| C | 1.548566000  | 2.431221000  | 1.851470000  |
| H | 1.148442000  | 3.352180000  | 2.293919000  |
| H | 0.705476000  | 1.761307000  | 1.630365000  |
| H | 2.193134000  | 1.944970000  | 2.594536000  |
| C | 3.527452000  | 3.640818000  | 0.976753000  |
| H | 4.180806000  | 3.140644000  | 1.701366000  |
| H | 4.120405000  | 3.938025000  | 0.103756000  |
| H | 3.149699000  | 4.554607000  | 1.447876000  |
| C | 1.478970000  | 3.533361000  | -0.415409000 |
| H | 2.059342000  | 3.779084000  | -1.313090000 |
| H | 0.599407000  | 2.950966000  | -0.731676000 |
| H | 1.117719000  | 4.467230000  | 0.032391000  |
| H | -1.916644000 | -2.851601000 | -0.153896000 |
| B | -0.406276000 | -1.543090000 | 0.405472000  |
| O | 0.683739000  | -2.379308000 | 0.576608000  |
| O | -1.093725000 | -1.298231000 | 1.585415000  |
| C | 0.941982000  | -2.416204000 | 1.998935000  |
| C | -0.474184000 | -2.129378000 | 2.599003000  |
| C | 1.963224000  | -1.333864000 | 2.312391000  |
| C | 1.509394000  | -3.774952000 | 2.350893000  |
| C | -0.466494000 | -1.362376000 | 3.903840000  |
| C | -1.327252000 | -3.381316000 | 2.737007000  |
| H | 2.263177000  | -1.357996000 | 3.366445000  |
| H | 2.859060000  | -1.498363000 | 1.698981000  |
| H | 1.572352000  | -0.338424000 | 2.077307000  |
| H | 2.502266000  | -3.891777000 | 1.899643000  |
| H | 1.623378000  | -3.872653000 | 3.437803000  |

|   |              |              |             |
|---|--------------|--------------|-------------|
| H | 0.876158000  | -4.591746000 | 1.991756000 |
| H | -1.496213000 | -1.213649000 | 4.250318000 |
| H | 0.070657000  | -1.921875000 | 4.680224000 |
| H | 0.000495000  | -0.376880000 | 3.797926000 |
| H | -0.985498000 | -4.013119000 | 3.565447000 |
| H | -2.361469000 | -3.083173000 | 2.944902000 |
| H | -1.324162000 | -3.986195000 | 1.822151000 |

## TS E

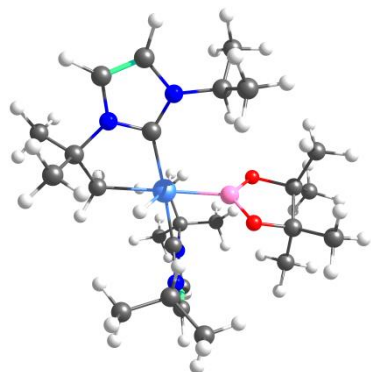

|   |              |              |              |
|---|--------------|--------------|--------------|
| C | -2.391925000 | 0.569173000  | -0.115041000 |
| C | -4.206342000 | 1.891016000  | -0.081575000 |
| H | -4.761304000 | 2.818587000  | -0.099574000 |
| C | -4.638323000 | 0.609288000  | 0.010917000  |
| H | -5.639256000 | 0.207921000  | 0.087126000  |
| C | -3.455120000 | -1.665383000 | 0.138604000  |
| C | -3.681525000 | -1.992086000 | 1.610112000  |
| H | -2.903725000 | -1.540791000 | 2.240799000  |
| H | -3.658912000 | -3.078447000 | 1.757205000  |
| H | -4.655448000 | -1.623086000 | 1.955013000  |
| C | -2.070107000 | -2.092956000 | -0.326961000 |
| H | -2.054157000 | -2.205951000 | -1.421606000 |
| H | -1.806419000 | -3.060238000 | 0.116124000  |
| C | -1.974925000 | 3.054269000  | -0.202193000 |
| H | -0.982184000 | 2.693566000  | -0.497193000 |
| C | -2.476142000 | 4.034501000  | -1.245093000 |
| H | -2.596872000 | 3.554848000  | -2.222662000 |
| H | -1.752458000 | 4.850244000  | -1.351059000 |
| H | -3.433579000 | 4.484768000  | -0.955494000 |
| C | -1.909569000 | 3.662134000  | 1.187380000  |
| H | -2.914233000 | 3.917352000  | 1.548522000  |
| H | -1.320232000 | 4.585890000  | 1.171526000  |
| H | -1.448907000 | 2.965433000  | 1.899223000  |
| C | 1.152844000  | -1.572911000 | -0.007577000 |
| C | 2.900168000  | -2.731962000 | 0.806850000  |
| H | 3.520154000  | -3.197929000 | 1.559407000  |
| C | 3.028965000  | -2.692349000 | -0.536654000 |
| H | 3.794152000  | -3.104219000 | -1.177878000 |
| C | 1.832465000  | -1.659121000 | -2.493792000 |
| C | 0.451373000  | -1.125546000 | -2.837876000 |
| H | -0.332153000 | -1.869117000 | -2.660525000 |
| H | 0.437958000  | -0.876737000 | -3.905661000 |
| H | 0.217801000  | -0.180244000 | -2.315063000 |
| C | 2.061615000  | -2.941691000 | -3.286543000 |
| H | 3.086683000  | -3.316262000 | -3.195290000 |
| H | 1.883094000  | -2.740140000 | -4.348709000 |
| H | 1.369225000  | -3.729243000 | -2.965803000 |

|    |              |              |              |
|----|--------------|--------------|--------------|
| C  | 2.88854000   | -0.612665000 | -2.830153000 |
| H  | 2.684410000  | 0.321961000  | -2.293442000 |
| H  | 2.867372000  | -0.403686000 | -3.906339000 |
| H  | 3.896594000  | -0.960680000 | -2.573770000 |
| C  | 1.222872000  | -1.890428000 | 2.494342000  |
| H  | 0.564824000  | -1.015075000 | 2.461443000  |
| C  | 2.338782000  | -1.597564000 | 3.476492000  |
| H  | 3.027265000  | -2.443991000 | 3.586252000  |
| H  | 1.901433000  | -1.403800000 | 4.461720000  |
| H  | 2.907034000  | -0.710187000 | 3.175807000  |
| C  | 0.428013000  | -3.126836000 | 2.872125000  |
| H  | -0.395890000 | -3.303384000 | 2.169410000  |
| H  | 0.003489000  | -3.009438000 | 3.875589000  |
| H  | 1.073437000  | -4.014927000 | 2.876928000  |
| C  | -4.546375000 | -2.299686000 | -0.716851000 |
| H  | -5.554377000 | -2.062697000 | -0.353417000 |
| H  | -4.432708000 | -3.389436000 | -0.687786000 |
| H  | -4.464427000 | -1.974238000 | -1.760834000 |
| N  | 1.945444000  | -1.981006000 | -1.034430000 |
| N  | 1.748906000  | -2.032467000 | 1.119902000  |
| N  | -2.825587000 | 1.849379000  | -0.164573000 |
| N  | -3.514389000 | -0.185920000 | -0.019099000 |
| Pt | -0.592403000 | -0.464468000 | -0.086795000 |
| H  | -1.052904000 | -1.097944000 | 1.229015000  |
| B  | 0.856014000  | 1.102631000  | 0.132225000  |
| O  | 1.561441000  | 1.296788000  | 1.301864000  |
| O  | 1.326635000  | 1.919936000  | -0.878044000 |
| C  | 2.738724000  | 2.080766000  | 0.980148000  |
| C  | 2.289257000  | 2.843065000  | -0.298820000 |
| C  | 3.870312000  | 1.098354000  | 0.715720000  |
| C  | 3.080904000  | 2.960087000  | 2.162599000  |
| C  | 3.384670000  | 3.113438000  | -1.307781000 |
| C  | 1.547386000  | 4.133836000  | 0.004925000  |
| H  | 4.814974000  | 1.618054000  | 0.517224000  |
| H  | 4.015877000  | 0.466340000  | 1.599249000  |
| H  | 3.647068000  | 0.445876000  | -0.138743000 |
| H  | 3.369310000  | 2.334518000  | 3.016236000  |
| H  | 3.928660000  | 3.615409000  | 1.925468000  |
| H  | 2.233748000  | 3.581450000  | 2.468438000  |
| H  | 2.966215000  | 3.640347000  | -2.173443000 |
| H  | 4.158193000  | 3.756362000  | -0.868805000 |
| H  | 3.861848000  | 2.196978000  | -1.668528000 |
| H  | 2.232231000  | 4.914690000  | 0.355935000  |
| H  | 1.066820000  | 4.493598000  | -0.912990000 |
| H  | 0.773128000  | 3.986859000  | 0.766846000  |

**TS isom**

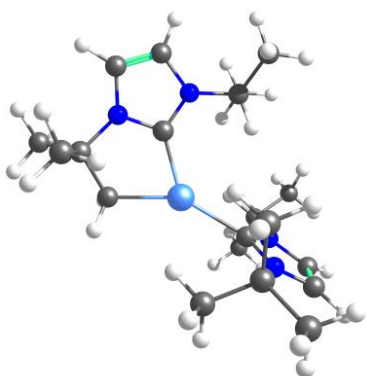

|    |              |              |              |
|----|--------------|--------------|--------------|
| Pt | -0.207404000 | -0.374787000 | -0.486215000 |
| N  | -2.086692000 | 1.399159000  | 1.063734000  |
| N  | -3.072344000 | -0.219758000 | 0.026080000  |
| N  | 2.820679000  | -0.825305000 | 0.463584000  |
| N  | 2.595324000  | 1.031060000  | -0.611565000 |
| C  | -1.867199000 | 0.341586000  | 0.251030000  |
| C  | -3.442073000 | 1.487483000  | 1.342063000  |
| C  | -4.060940000 | 0.463439000  | 0.698395000  |
| C  | 1.896765000  | -0.041511000 | -0.161804000 |
| C  | 3.924609000  | 0.927687000  | -0.282216000 |
| C  | 4.067136000  | -0.241292000 | 0.394774000  |
| H  | -3.846345000 | 2.265579000  | 1.974458000  |
| H  | -5.101815000 | 0.172907000  | 0.664814000  |
| H  | 4.655086000  | 1.678217000  | -0.550458000 |
| H  | 4.955561000  | -0.683863000 | 0.818514000  |
| C  | 2.016401000  | 2.151970000  | -1.379502000 |
| C  | 2.363198000  | 3.474010000  | -0.722743000 |
| H  | 3.440271000  | 3.678343000  | -0.772925000 |
| H  | 1.848710000  | 4.289383000  | -1.242971000 |
| H  | 2.057530000  | 3.488098000  | 0.330583000  |
| C  | 2.464784000  | 2.074320000  | -2.825974000 |
| H  | 1.991164000  | 2.873857000  | -3.405989000 |
| H  | 3.552329000  | 2.194665000  | -2.910620000 |
| H  | 2.184927000  | 1.112481000  | -3.271574000 |
| C  | -1.053353000 | 2.341168000  | 1.537290000  |
| C  | -3.073145000 | -1.440201000 | -0.794677000 |
| C  | -1.725001000 | -1.346497000 | -1.518979000 |
| H  | -1.829138000 | -0.786899000 | -2.460537000 |
| H  | -1.321211000 | -2.346673000 | -1.733840000 |
| C  | -1.187586000 | 2.571404000  | 3.029477000  |
| H  | -2.107002000 | 3.117655000  | 3.274339000  |
| H  | -1.184646000 | 1.624837000  | 3.581281000  |
| H  | -0.344283000 | 3.176029000  | 3.379528000  |
| C  | -1.125301000 | 3.627461000  | 0.735785000  |
| H  | -0.990070000 | 3.437152000  | -0.335977000 |
| H  | -2.096211000 | 4.119125000  | 0.879218000  |
| H  | -0.343784000 | 4.321459000  | 1.065581000  |
| C  | -4.246208000 | -1.423983000 | -1.760324000 |
| H  | -5.204161000 | -1.515783000 | -1.232878000 |
| H  | -4.256998000 | -0.500550000 | -2.351394000 |
| H  | -4.161783000 | -2.272868000 | -2.448695000 |
| C  | -3.134409000 | -2.652986000 | 0.123249000  |
| H  | -3.144265000 | -3.571719000 | -0.475131000 |
| H  | -2.261869000 | -2.681692000 | 0.789268000  |
| H  | -4.043937000 | -2.635839000 | 0.736676000  |
| C  | 2.512535000  | -2.121555000 | 1.157526000  |

|   |              |              |              |
|---|--------------|--------------|--------------|
| C | 3.805608000  | -2.733737000 | 1.675205000  |
| H | 4.514832000  | -2.941195000 | 0.865058000  |
| H | 4.291769000  | -2.098823000 | 2.425095000  |
| H | 3.564272000  | -3.686437000 | 2.158071000  |
| C | 1.874982000  | -3.081797000 | 0.160789000  |
| H | 1.706617000  | -4.049068000 | 0.648774000  |
| H | 0.902670000  | -2.712776000 | -0.196528000 |
| H | 2.530682000  | -3.240317000 | -0.703942000 |
| C | 1.580411000  | -1.839093000 | 2.329939000  |
| H | 2.037974000  | -1.126706000 | 3.027718000  |
| H | 1.384854000  | -2.772525000 | 2.871031000  |
| H | -0.101383000 | 1.829910000  | 1.334274000  |
| H | 0.619736000  | -1.430871000 | 1.989875000  |
| H | 0.931402000  | 1.984921000  | -1.324597000 |

### TS isom'

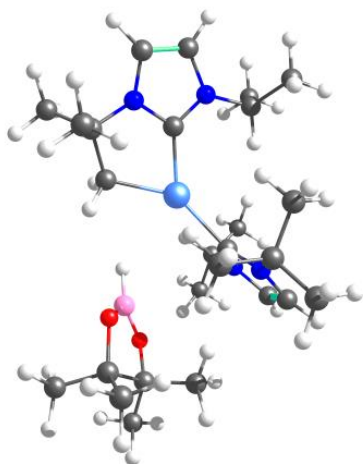

|    |              |              |              |
|----|--------------|--------------|--------------|
| Pt | 0.865728000  | 0.252192000  | -0.244488000 |
| N  | 3.848193000  | -0.174105000 | -0.020935000 |
| N  | 3.269834000  | 1.902326000  | -0.130669000 |
| N  | -0.961055000 | -1.948442000 | 1.226487000  |
| N  | -1.009461000 | -2.196651000 | -0.916201000 |
| C  | 2.780700000  | 0.645521000  | -0.152891000 |
| C  | 5.001833000  | 0.586312000  | 0.089234000  |
| C  | 4.637705000  | 1.893399000  | 0.031205000  |
| C  | -0.494876000 | -1.408895000 | 0.063088000  |
| C  | -1.760382000 | -3.216582000 | -0.386951000 |
| C  | -1.729465000 | -3.061852000 | 0.962229000  |
| H  | 5.975976000  | 0.129152000  | 0.194341000  |
| H  | 5.227890000  | 2.797994000  | 0.079558000  |
| H  | -2.258525000 | -3.959169000 | -0.994982000 |
| H  | -2.209419000 | -3.649275000 | 1.729759000  |
| C  | -0.712147000 | -2.051630000 | -2.356814000 |
| C  | 0.312195000  | -3.090682000 | -2.773017000 |
| H  | -0.094047000 | -4.104856000 | -2.667238000 |
| H  | 0.585436000  | -2.944194000 | -3.823799000 |
| H  | 1.222151000  | -3.018114000 | -2.165597000 |
| C  | -1.985084000 | -2.131982000 | -3.175901000 |
| H  | -1.762400000 | -1.879818000 | -4.218249000 |
| H  | -2.404966000 | -3.145888000 | -3.167559000 |
| H  | -2.740047000 | -1.433102000 | -2.800213000 |
| C  | 3.805365000  | -1.648357000 | -0.012472000 |
| C  | 2.275905000  | 2.983391000  | -0.156509000 |
| C  | 1.022528000  | 2.273780000  | -0.686084000 |

|   |              |              |              |
|---|--------------|--------------|--------------|
| H | 0.982997000  | 2.324846000  | -1.784058000 |
| H | 0.109947000  | 2.721850000  | -0.267669000 |
| C | 4.461369000  | -2.184512000 | 1.245313000  |
| H | 5.535792000  | -1.961639000 | 1.260196000  |
| H | 4.007163000  | -1.757559000 | 2.147129000  |
| H | 4.346609000  | -3.273221000 | 1.283424000  |
| C | 4.435269000  | -2.189676000 | -1.281678000 |
| H | 3.960549000  | -1.762199000 | -2.172483000 |
| H | 5.507317000  | -1.957171000 | -1.315980000 |
| H | 4.326243000  | -3.279151000 | -1.318305000 |
| C | 2.731143000  | 4.097903000  | -1.083340000 |
| H | 3.619772000  | 4.607696000  | -0.689923000 |
| H | 2.960600000  | 3.709368000  | -2.082599000 |
| H | 1.932296000  | 4.842702000  | -1.175917000 |
| C | 2.076018000  | 3.499226000  | 1.261502000  |
| H | 1.331578000  | 4.303943000  | 1.262930000  |
| H | 1.723358000  | 2.697428000  | 1.922721000  |
| H | 3.013652000  | 3.899390000  | 1.667249000  |
| C | -0.613805000 | -1.461984000 | 2.605346000  |
| C | -1.449172000 | -2.220540000 | 3.626792000  |
| H | -2.524572000 | -2.086685000 | 3.452645000  |
| H | -1.217515000 | -3.291893000 | 3.643233000  |
| H | -1.220246000 | -1.820680000 | 4.620034000  |
| C | -0.921697000 | 0.025054000  | 2.725078000  |
| H | -0.731597000 | 0.342060000  | 3.757397000  |
| H | -0.289810000 | 0.630275000  | 2.062212000  |
| H | -1.971937000 | 0.235103000  | 2.487485000  |
| C | 0.867015000  | -1.734609000 | 2.845378000  |
| H | 1.100440000  | -2.795571000 | 2.686487000  |
| H | 1.128372000  | -1.474551000 | 3.878258000  |
| H | 2.734008000  | -1.893438000 | 0.000830000  |
| H | 1.487933000  | -1.132148000 | 2.169538000  |
| H | -0.274141000 | -1.048151000 | -2.446537000 |
| H | -1.474193000 | 1.182984000  | -1.623149000 |
| B | -2.514827000 | 1.159571000  | -1.042325000 |
| O | -3.573519000 | 0.413235000  | -1.464561000 |
| O | -2.758979000 | 1.887224000  | 0.083833000  |
| C | -4.570538000 | 0.478369000  | -0.408513000 |
| C | -4.194558000 | 1.805010000  | 0.316105000  |
| C | -4.367600000 | -0.757309000 | 0.453437000  |
| C | -5.946926000 | 0.458761000  | -1.035017000 |
| C | -4.463223000 | 1.815088000  | 1.803611000  |
| C | -4.805043000 | 3.037275000  | -0.331176000 |
| H | -5.128272000 | -0.828992000 | 1.239567000  |
| H | -4.445890000 | -1.649525000 | -0.179690000 |
| H | -3.374801000 | -0.764244000 | 0.924253000  |
| H | -6.117484000 | -0.511303000 | -1.516270000 |
| H | -6.720586000 | 0.593965000  | -0.268981000 |
| H | -6.065641000 | 1.238131000  | -1.793452000 |
| H | -4.133938000 | 2.769172000  | 2.231110000  |
| H | -5.538947000 | 1.714542000  | 1.994865000  |
| H | -3.943620000 | 1.007468000  | 2.328540000  |
| H | -5.882739000 | 3.096459000  | -0.142203000 |
| H | -4.335948000 | 3.931156000  | 0.095032000  |
| H | -4.639217000 | 3.049569000  | -1.414910000 |

TS isom''

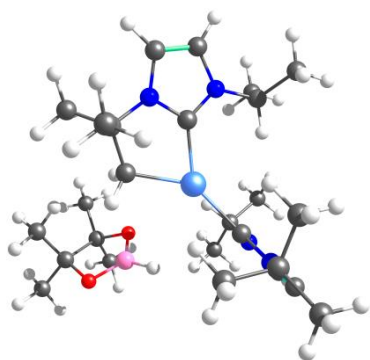

|    |              |              |              |
|----|--------------|--------------|--------------|
| Pt | 0.655761000  | -0.204308000 | -0.254943000 |
| N  | 2.427639000  | -2.209039000 | 1.124875000  |
| N  | 1.011202000  | -3.102573000 | -0.238832000 |
| N  | 1.627575000  | 2.796107000  | -0.917888000 |
| N  | 0.626814000  | 2.669565000  | 0.988035000  |
| C  | 1.420660000  | -1.924367000 | 0.271829000  |
| C  | 2.646275000  | -3.578318000 | 1.135709000  |
| C  | 1.761131000  | -4.140363000 | 0.271014000  |
| C  | 1.008430000  | 1.920814000  | -0.076998000 |
| C  | 1.003070000  | 3.980879000  | 0.829636000  |
| C  | 1.630466000  | 4.061849000  | -0.372814000 |
| H  | 3.407806000  | -4.028394000 | 1.757696000  |
| H  | 1.604997000  | -5.172605000 | -0.010631000 |
| H  | 0.804808000  | 4.742854000  | 1.570844000  |
| H  | 2.064459000  | 4.919783000  | -0.862780000 |
| C  | -0.052114000 | 2.140594000  | 2.188840000  |
| C  | 0.908705000  | 2.143499000  | 3.363203000  |
| H  | 1.187851000  | 3.167113000  | 3.644287000  |
| H  | 0.437219000  | 1.671656000  | 4.232492000  |
| H  | 1.824275000  | 1.587564000  | 3.123948000  |
| C  | -1.322982000 | 2.918657000  | 2.464206000  |
| H  | -1.846198000 | 2.468270000  | 3.314722000  |
| H  | -1.108086000 | 3.963431000  | 2.721685000  |
| H  | -1.994598000 | 2.899028000  | 1.597990000  |
| C  | 3.171020000  | -1.214362000 | 1.920604000  |
| C  | -0.035310000 | -3.021444000 | -1.268925000 |
| C  | -0.639058000 | -1.634385000 | -1.012781000 |
| H  | -1.434600000 | -1.694179000 | -0.254937000 |
| H  | -1.042869000 | -1.195763000 | -1.938426000 |
| C  | 4.657196000  | -1.339822000 | 1.651427000  |
| H  | 5.048448000  | -2.301291000 | 2.007357000  |
| H  | 4.871446000  | -1.251153000 | 0.579888000  |
| H  | 5.196531000  | -0.545233000 | 2.178042000  |
| C  | 2.812714000  | -1.349682000 | 3.387447000  |
| H  | 1.731805000  | -1.239913000 | 3.539125000  |
| H  | 3.122778000  | -2.327091000 | 3.778883000  |
| H  | 3.324749000  | -0.575636000 | 3.970010000  |
| C  | -1.059471000 | -4.126942000 | -1.075925000 |
| H  | -0.618032000 | -5.118095000 | -1.240790000 |
| H  | -1.489219000 | -4.094599000 | -0.067100000 |
| H  | -1.869756000 | -4.000665000 | -1.803572000 |
| C  | 0.615611000  | -3.111575000 | -2.642317000 |
| H  | -0.152542000 | -3.054325000 | -3.422385000 |
| H  | 1.325339000  | -2.287971000 | -2.792841000 |
| H  | 1.151226000  | -4.061889000 | -2.759513000 |
| C  | 2.231845000  | 2.424709000  | -2.240859000 |

|   |              |              |              |
|---|--------------|--------------|--------------|
| C | 2.765834000  | 3.678282000  | -2.918025000 |
| H | 1.974340000  | 4.414816000  | -3.101202000 |
| H | 3.568748000  | 4.150988000  | -2.340045000 |
| H | 3.183081000  | 3.390924000  | -3.888836000 |
| C | 1.151726000  | 1.807716000  | -3.122078000 |
| H | 1.567686000  | 1.609559000  | -4.116977000 |
| H | 0.782505000  | 0.857046000  | -2.713391000 |
| H | 0.302924000  | 2.494010000  | -3.233305000 |
| C | 3.381452000  | 1.453426000  | -1.997416000 |
| H | 4.132888000  | 1.900420000  | -1.334184000 |
| H | 3.864725000  | 1.214024000  | -2.952118000 |
| H | 2.814087000  | -0.243220000 | 1.547973000  |
| H | 3.028596000  | 0.517120000  | -1.545448000 |
| H | -0.307544000 | 1.105083000  | 1.924007000  |
| H | -1.805086000 | 1.407698000  | -0.934630000 |
| B | -2.804581000 | 0.894344000  | -0.534796000 |
| O | -2.930279000 | 0.403038000  | 0.730880000  |
| O | -3.914361000 | 0.748602000  | -1.306430000 |
| C | -4.335108000 | 0.068781000  | 0.906587000  |
| C | -4.830105000 | -0.102670000 | -0.564687000 |
| C | -4.976478000 | 1.245265000  | 1.623583000  |
| C | -4.435856000 | -1.178491000 | 1.756639000  |
| C | -6.244931000 | 0.368625000  | -0.818332000 |
| C | -4.644287000 | -1.510242000 | -1.105022000 |
| H | -6.032658000 | 1.050653000  | 1.842220000  |
| H | -4.460434000 | 1.409981000  | 2.576422000  |
| H | -4.907610000 | 2.167795000  | 1.034133000  |
| H | -4.072432000 | -0.966622000 | 2.768836000  |
| H | -5.479887000 | -1.506485000 | 1.836114000  |
| H | -3.841997000 | -2.002049000 | 1.346943000  |
| H | -6.504055000 | 0.207430000  | -1.871042000 |
| H | -6.953945000 | -0.202017000 | -0.205789000 |
| H | -6.367990000 | 1.432556000  | -0.596484000 |
| H | -5.352276000 | -2.212306000 | -0.650189000 |
| H | -4.820033000 | -1.500644000 | -2.186561000 |
| H | -3.625989000 | -1.877511000 | -0.927149000 |

## 15. Crystallographic details

Low-temperature diffraction data were collected on a Bruker D8 Quest APEX-III single crystal diffractometer with a Photon III detector and a  $\mu$ S 3.0 microfocus X-ray source at the Centro de Investigación, Tecnología e Innovación de la Universidad de Sevilla. Data were collected by means of  $\omega$  and  $\phi$  scans using monochromatic radiation  $\lambda(\text{Ag K}\alpha 1) = 0.56086 \text{ \AA}$ . The diffraction images collected were processed and scaled using APEX-III v2018.7-2 software. The structures were solved with SHELXT and was refined against F<sup>2</sup> on all data by full-matrix least squares with SHELXL,<sup>[24]</sup> using Olex2 as graphical interface.<sup>[25]</sup> All non-hydrogen atoms were refined anisotropically. Hydrogen atoms were included in the model at geometrically calculated positions and refined using a riding model, unless otherwise noted. The isotropic displacement parameters of all hydrogen atoms were fixed to 1.2 times the U value of the atoms to which they are linked (1.5 times for methyl groups). C-F and F-F distances in  $\text{BAr}^{\text{F}}$  counterions were restricted with SADI instructions.



The x-ray crystallographic coordinates for structures **2c**, **3c**, **4a** and **5** have been deposited at the Cambridge Crystallographic Data Centre (CCDC) under deposition numbers 2033931-2033934, respectively. These data are provided free of charge by The Cambridge Crystallographic Data Centre.

The hydride ligand in structure (**4a**) was found from different Fourier maps and included in a refinement with isotropic parameters. BPin fragment were refined according to positional disorder of C atoms in 3:1 occupancy ratio. The H atom in PtHB in structure (**3c**) was found from difference Fourier maps and included in a refinement with isotropic parameters. The unit cell contains two dichloromethane molecules which were treated as a diffuse contribution to the overall scattering without specific atom positions by BYPASS.<sup>[26]</sup> High residual electronic density can be found near Pt in structure (**2c**), probably due to absorption problems in the sample.

The hydride ligand in structure (**5**) was found from different Fourier maps and included in a refinement with isotropic parameters.

**Crystal Data** for  $C_{58}H_{54}B_2F_{24}N_6Pt$  (**2c**) ( $M=1507.78$  g/mol): triclinic, space group P-1 (no. 2),  $a = 17.7840(10)$  Å,  $b = 19.3314(12)$  Å,  $c = 19.4985(12)$  Å,  $\alpha = 77.056(3)^\circ$ ,  $\beta = 83.793(3)^\circ$ ,  $\gamma = 71.134(3)^\circ$ ,  $V = 6177.4(7)$  Å<sup>3</sup>,  $Z = 4$ ,  $T = 99.99$  K,  $\mu(AgK\alpha) = 1.302$  mm<sup>-1</sup>,  $D_{calc} = 1.621$  g/cm<sup>3</sup>, 140866 reflections measured ( $3.298^\circ \leq 2\theta \leq 48.21^\circ$ ), 39747 unique ( $R_{int} = 0.0671$ ,  $R_{sigma} = 0.0875$ ) which were used in all calculations. The final  $R_1$  was 0.0600 ( $I > 2\sigma(I)$ ) and  $wR_2$  was 0.1624 (all data).

**Crystal Data** for  $C_{58}H_{54}B_2F_{24}N_6Pt$  (**3c**) ( $M=1507.78$  g/mol): triclinic, space group P-1 (no. 2),  $a = 12.8046(7)$  Å,  $b = 13.6804(7)$  Å,  $c = 18.4265(10)$  Å,  $\alpha = 96.145(3)^\circ$ ,  $\beta = 98.035(3)^\circ$ ,  $\gamma = 91.631(3)^\circ$ ,  $V = 3174.7(3)$  Å<sup>3</sup>,  $Z = 2$ ,  $T = 173.15$  K,  $\mu(AgK\alpha) = 1.267$  mm<sup>-1</sup>,  $D_{calc} = 1.577$  g/cm<sup>3</sup>, 89536 reflections measured ( $3.392^\circ \leq 2\theta \leq 51.602^\circ$ ), 24625 unique ( $R_{int} = 0.0653$ ,  $R_{sigma} = 0.0827$ ) which were used in all calculations. The final  $R_1$  was 0.0438 ( $I > 2\sigma(I)$ ) and  $wR_2$  was 0.0888 (all data).

**Crystal Data** for  $C_{58}H_{60}B_2F_{24}N_4O_2Pt$  (**4a**) ( $M=1517.81$  g/mol): monoclinic, space group P2<sub>1</sub>/c (no. 14),  $a = 13.9627(11)$  Å,  $b = 24.4797(19)$  Å,  $c = 20.1924(16)$  Å,  $\beta = 109.711(4)^\circ$ ,  $V = 6497.4(9)$  Å<sup>3</sup>,  $Z = 4$ ,  $T = 173.15$  K,  $\mu(AgK\alpha) = 1.239$  mm<sup>-1</sup>,  $D_{calc} = 1.552$  g/cm<sup>3</sup>, 134022 reflections measured ( $3.628^\circ \leq 2\theta \leq 45.08^\circ$ ), 17211 unique ( $R_{int} = 0.0699$ ,  $R_{sigma} = 0.0450$ ) which were used in all calculations. The final  $R_1$  was 0.0358 ( $I > 2\sigma(I)$ ) and  $wR_2$  was 0.0813 (all data).

**Crystal Data** for  $C_{63}H_{69}B_2F_{24}N_5O_2Pt$  (**5**) ( $M=1517.81$  g/mol): monoclinic, space group P2<sub>1</sub>/c (no. 14),  $a = 13.0010(7)$  Å,  $b = 26.3167(13)$  Å,  $c = 21.0636(10)$  Å,  $\beta = 101.229(2)^\circ$ ,  $V = 7068.8(6)$  Å<sup>3</sup>,  $Z = 4$ ,  $T = 273.15$  K,  $\mu(AgK\alpha) = 1.239$  mm<sup>-1</sup>,  $D_{calc} = 1.505$  g/cm<sup>3</sup>, 83935 reflections measured ( $3.342^\circ \leq 2\theta \leq 47.814^\circ$ ), 21793 unique ( $R_{int} = 0.0574$ ,  $R_{sigma} = 0.0644$ ) which were used in all calculations. The final  $R_1$  was 0.0506 ( $I > 2\sigma(I)$ ) and  $wR_2$  was 0.1148 (all data).

## 16. References

- [1] S. W. Hadebe and R. S. Robinson, *Eur. J. Org. Chem.*, 2006, 4898.  
[2] P. Ríos, H. Fouilloux, P. Vidossich, J. Díez, A. Lledós and S. Conejero, *Angew. Chem., Int. Ed.*, 2018, **57**, 3217.

- [3] P. Ríos, H. Fouilloux, J. Díez, P. Vidossich, A. Lledós and S. Conejero, *Chem. Eur. J.*, 2019, **25**, 11346.
- [4] Y. Zhao and D.G. Truhlar, *Theor. Chem. Acc.*, 2008, **120**, 215-241.
- [5] Gaussian 09, Revision D.01, M. J. Frisch, G. W. Trucks, H. B. Schlegel, G. E. Scuseria, M. A. Robb, J. R. Cheeseman, G. Scalmani, V. Barone, B. Mennucci, G. A. Petersson, H. Nakatsuji, M. Caricato, X. Li, H. P. Hratchian, A. F. Izmaylov, J. Bloino, G. Zheng, J. L. Sonnenberg, M. Hada, M. Ehara, K. Toyota, R. Fukuda, J. Hasegawa, M. Ishida, T. Nakajima, Y. Honda, O. Kitao, H. Nakai, T. Vreven, J. A. Montgomery, Jr., J. E. Peralta, F. Ogliaro, M. Bearpark, J. J. Heyd, E. Brothers, K. N. Kudin, V. N. Staroverov, R. Kobayashi, J. Normand, K. Raghavachari, A. Rendell, J. C. Burant, S. S. Iyengar, J. Tomasi, M. Cossi, N. Rega, J. M. Millam, M. Klene, J. E. Knox, J. B. Cross, V. Bakken, C. Adamo, J. Jaramillo, R. Gomperts, R. E. Stratmann, O. Yazyev, A. J. Austin, R. Cammi, C. Pomelli, J. W. Ochterski, R. L. Martin, K. Morokuma, V. G. Zakrzewski, G. A. Voth, P. Salvador, J. J. Dannenberg, S. Dapprich, A. D. Daniels, Ö. Farkas, J. B. Foresman, J. V. Ortiz, J. Cioslowski, and D. J. Fox, Gaussian, Inc., Wallingford CT, 2009.
- [6] S. A. V. Marenich, C. J. Cramer and D. G. Truhlar, *J. Phys. Chem. B*, 2009, **113**, 6378–6396.
- [7] S. Grimme, *Chem. Eur. J.*, 2012, **18**, 9955–9964.
- [8] G. Luchini, J. V. Alegre-Requena, I. Funes-Ardoiz, R. S. Paton, GoodVibes: Automated Thermochemistry for Heterogeneous Computational Chemistry Data. *F1000Research*, 2020, **9**, 291  
[DOI: 10.12688/f1000research.22758.1](https://doi.org/10.12688/f1000research.22758.1)
- [9] (a) A. D. Becke, *J. Chem. Phys.*, 1993, **98**, 5648–5652; (b) C. Lee, W. Yang and R. G. Parr, *Phys. Rev. B: Condens. Matter Mater. Phys.*, 1988, **37**, 785–789.
- [10] S. Grimme, J. Anthony, S. Ehrlich and H. Krieg, *J. Chem. Phys.*, 2010, **132**, 154104.
- [11] R. F. W. Bader, *Atom in Molecules: A Quantum Theory*; Oxford University Press: Oxford, U.K., 1995.
- [12] T. Lu and F. Chen, *J. Comput. Chem.*, 2012, **33**, 580-592.
- [13] (a) W. J. Hehre, R. Ditchfield and J. A. Pople, *J. Chem. Phys.*, 1972, **56**, 2257-2261; (b) P. C. Hariharan and J. A. Pople, *Theor. Chim. Acta.*, 1973, **28**, 213-222; (c) M. M. Francl, W. J. Pietro, W. J. Hehre J.S., Binkley, M.S. Gordon, D.J. DeFrees and J. A. Pople, *J. Chem. Phys.*, 1982, **77**, 3654-3665.
- [14] D. Andrae, U. Häussermann, M. Dolg, H. Stoll and H. Preuss, *Theor. Chim. Acta*, 1990, **77**, 123-141.
- [15] A. W. Ehlers, M. Boehme, S. Dapprich, A. Gobbi, A. Hoellwarth, V. Jonas, K. F. Koehler, R. Stegmann, A. Veldkamp and G. Frenking, *Chem. Phys. Lett.*, 1993, **208**, 111-114.
- [16] (a) F. Weigend and R. Ahlrichs, *Phys. Chem. Chem. Phys.*, 2005, **7**, 3297–3305; (b) F. Weigend, *Phys. Chem. Chem. Phys.*, 2006, **8**, 1057-1065.
- [17] (a) N. Marzari, A. A. Mostofi, J. R. Yates, I. Souza and D. Vanderbilt, *Rev. Mod. Phys.*, 2012, **84**, 1419-1475; (b) P. Vidossich and A. Lledós, *Dalton Trans.*, 2014, **43**, 11145–11151; (c) G. Knizia, J. E. M. N. Klein, *Angew. Chem., Int. Ed.*, 2015, **54**, 5518–5522; (d) P. Vidossich and A. Lledós, *ChemTexts*, 2017, **3**, 17; (e) G. Sciortino, A. Lledós and P. Vidossich, *Dalton Trans.*, 2019, **48**, 1574-15752.
- [18] J. Hutter, M. Iannuzzi, F. Schiffmann and J. VandeVondele, *Wiley Interdiscip. Rev. Comput. Mol. Sci.*, 2014, **4**, 15-25.
- [19] J. P. Perdew, K. Burke and M. Ernzerhof, *Phys. Rev. Lett.*, 1996, **77**, 3865–3868.
- [20] G. Lippert, G.; J. Hutter and M. Parrinello, *Mol. Phys.*, 1997, **92**, 477–488.
- [21] J. VandeVondele and J. Hutter, *J. Chem. Phys.*, 2007, **127**, 114105.
- [22] (a) S. Goedecker, M. Teter and J. Hutter, *Phys. Rev. B Condens. Matter.*, 1996, **54**, 1703-1710; (b) M. Krack, *Theor. Chem. Acc.*, 2005, **114**, 145–152.
- [23] L. Genovese, T. Deutsch and S. Goedecker, *J. Chem. Phys.*, 2007, **127**, 054704.
- [24] G. M. Sheldrick, Crystal structure refinement with SHELXL. *Acta Cryst.*, 2008, **A64**, 112-122.
- [25] O.V. Dolomanov L.J. Bourhis, R. J. Gildea, J. A. K.Howard and H. Puschmann, *J. Appl. Cryst.* 2009, **42**, 339-341.
- [26] P. van der Sluis and A. L. Spek *Acta Cryst.*, 1990, **A46**, 194-201.
